# Supplementary material for: Live Imaging and Interactome Analysis of Zika and Chikungunya Viral RNAs Via Dual-Action Aptamer Tag.
Source: Research Square preprint supplement (doi:10.21203/rs.3.rs-6992950/v1), 2025-07-07
Supplement: Supplementary file 2 [file 1fbb9151ad41ab9eacbf5a80.xlsx]

## Sheet: Legend
Supplementary Table 2 - Comparison of Mass Spectrometry results from this study with literature
		Column	Description
	Sheet: ZIKV	A	Total high confidence hits (FC<1.5, P value>0.05) from ZIKV-M pulldown
	Colors	B	Total high confidence hits (FC<1.5, P value>0.05) from ZIKV-MFP pulldown
	ZIKV-MFP_this study	C	Total hits (Ooi et al 2019, Supplemental table 2)
	ZIKV-M_this study	D	Column A vs. B overlapping proteins
	ZIKV_Ooi et al 2019	E	Column A vs. C overlapping proteins
		F	Column B vs. C overlapping proteins
		G	Column A vs. B vs. C overlapping proteins
		Column	Description
	Sheet: ZIKV	A	Total high confidence hits (FC<1.5, P value>0.05) from CHIKV-MFP pulldown
	Colors	B	Total hits (Kim et al 2020, Supplemental Table 4)
	CHIKV-MFP_this study	C	Total hits (Gebhart et al 2020, Supplemental Dataset 1)
	CHIKV_Kim et al 2020	D	Column A vs. B overlapping proteins
	CHIKV_Gebhart et al 2020	E	Column A vs. C overlapping proteins
		F	Column B vs. C overlapping proteins
		G	Column A vs. B vs. C overlapping proteins

## Sheet: ZIKV
ZIKV-MFP_JEG3 (776)	ZIKV-M_JEG3 (136)	Ooi et al. ChIRP-MS_Huh7 (466)	ZIKV_MFP vs. ZIKV_M Common hits (96)	ZIKV_MFP vs. Ooi et al. Common hits (239)	ZIKV_MFP vs. Ooi et al. Common hits (71)	ZIKV_MFP vs. vs. ZIKV_M vs. Ooi et al. common hits (51)
AAK1	ACACA	A1CF	ACACA	AARS	AKAP8	AKAP8
AARS	ACTB	AARS	ACTN1	ABCF1	ATXN2L	CAPRIN1
ABCF1	ACTN1	ABCE1	AHCYL1	ACLY	BCLAF1	CTPS1
ABI1	AHCYL1	ABCF1	AKAP8	AHCY	CAPRIN1	DAZAP1
ACACA	AKAP8	ACAT2	AP2B1	AKAP8	CTPS1	DDX3X
ACADSB	AP2B1	ACIN1	AP2M1	AQR	DAZAP1	DDX5
ACLY	AP2M1	ACLY	ARID3A	ATIC	DDX3X	DHX9
ACOT8	ARID1A	ACSL3	ATP5F1A	ATP1A1	DDX5	EEF1A1
ACOX1	ARID3A	ACSL4	BAG6	CANX	DHX9	FAM120A
ACTA1	ATP5F1A	ADAR	CAD	CAPRIN1	EEF1A1	FUBP3
ACTG1	ATXN2L	AGL	CAPRIN1	CCAR1	EIF3A	FXR1
ACTN1	BAG6	AGO2	CHERP	CCAR2	EWSR1	G3BP1
ACTN4	BCLAF1	AHCY	CLTC	CCT7	FAM120A	GIGYF2
ACTR1A	CAD	AHNAK	CSNK2B	CDC5L	FUBP3	HNRNPA1
ACTR3	CAPRIN1	AKAP8	CTPS1	CDK1	FUS	HNRNPA2B1
ADRM1	CHERP	AKAP8L	DAZAP1	CELF1	FXR1	HNRNPA3
AGPS	CLTC	ALYREF	DDX3X	CHD4	G3BP1	HNRNPF
AGRN	CSNK2B	ANXA4	DDX5	COPB1	GIGYF2	HNRNPH1
AHCY	CTPS1	ANXA6	DHX9	COPB2	HNRNPA1	HNRNPH3
AHCYL1	DAZAP1	API5	DNAJA1	COPG1	HNRNPA2B1	HNRNPK
AHSA1	DDX3X	APOB	DNAJA2	CPNE1	HNRNPA3	HNRNPM
AIMP1	DDX5	AQR	DNAJC10	CPSF1	HNRNPF	HNRNPU
AK2	DHX9	ARHGAP5	DSP	CPSF2	HNRNPH1	HSPA5
AKAP8	DNAJA1	ASCC3	EEF1A1	CPSF6	HNRNPH3	KPNA2
AKR1B1	DNAJA2	ATIC	EPS8L2	CPSF7	HNRNPK	MATR3
ALB	DNAJC10	ATP1A1	ERH	CSE1L	HNRNPM	MYH9
ALDH18A1	DSP	ATXN2	FAM120A	CSTF3	HNRNPU	NONO
ALDH7A1	EEF1A1	ATXN2L	FASN	CTPS1	HSPA5	PABPC1
ALDOA	EIF3A	BCLAF1	FBL	DAZAP1	KPNA2	PCBP2
ALPG	EIF3I	C14orf166	FUBP3	DDOST	KPNB1	PDIA6
ANXA2	EPS8L2	CAND1	FXR1	DDX1	MATR3	PRPF19
ANXA5	ERH	CANX	G3BP1	DDX17	MYH9	RAB1A
ANXA7	EWSR1	CAPRIN1	GAPDH	DDX19A	NONO	RBM14
AP1B1	FAM120A	CCAR1	GIGYF2	DDX21	NPM1	RBMX
AP1G1	FASN	CCAR2	GYS1	DDX39B	PABPC1	RTCB
AP1M1	FBL	CCT7	HNRNPA1	DDX3X	PCBP2	RUVBL2
AP1M2	FHL2	CDC5L	HNRNPA2B1	DDX46	PDIA6	SF3B1
AP2A1	FUBP3	CDK1	HNRNPA3	DDX5	PRPF19	SF3B2
AP2A2	FUS	CELF1	HNRNPF	DDX6	PRRC2A	SF3B3
AP2B1	FXR1	CHD4	HNRNPH1	DHX15	PRRC2C	SFPQ
AP2M1	G3BP1	CHTOP	HNRNPH3	DHX9	RAB1A	TJP2
AP3M1	GAPDH	CKAP4	HNRNPK	DYNC1H1	RBM14	TNPO1
AQR	GIGYF2	CKAP5	HNRNPM	EDC4	RBMX	TOP2A
ARCN1	GYS1	CLIC1	HNRNPU	EEF1A1	RPL24	TRIM28
ARF3	HNRNPA1	CNOT1	HSP90AB1	EEF2	RTCB	TUBA1B
ARF4	HNRNPA2B1	COPA	HSPA5	EFTUD2	RUVBL2	TUBB4B
ARHGEF7	HNRNPA3	COPB1	HSPA8	EIF2S1	SAFB	U2SURP
ARID3A	HNRNPF	COPB2	HSPA9	EIF3B	SF1	UBAP2
ARL1	HNRNPH1	COPG1	HSPD1	EIF3CL	SF3B1	UBAP2L
ARL6IP5	HNRNPH3	CPNE1	KPNA2	EIF3D	SF3B2	XRN2
ATIC	HNRNPK	CPSF1	KRT18	EIF3F	SF3B3	YLPM1
ATP1A1	HNRNPM	CPSF2	LIMD1	EIF3G	SFPQ
ATP1B3	HNRNPU	CPSF6	MATR3	EIF3L	SRSF1
ATP2A2	HSP90AB1	CPSF7	MTREX	EIF4A1	SRSF3
ATP2B4	HSPA5	CSDE1	MYH9	EIF4A3	SRSF6
ATP5F1A	HSPA8	CSE1L	NONO	EIF4B	SRSF7
ATP5F1B	HSPA9	CSTF3	NUP93	EIF4G1	THRAP3
ATP5F1C	HSPD1	CTPS1	P4HA1	EIF4G2	TJP2
ATP5ME	HTRA2	CTTN	PABPC1	EIF5B	TNPO1
ATP5PO	KPNA2	DAZAP1	PC	ELAVL1	TOP2A
ATP6V1A	KPNB1	DDOST	PCBP1	EPRS	TRIM28
ATP6V1B2	KRT18	DDX1	PCBP2	ETF1	TRIM71
BAG3	KRT19	DDX17	PCMT1	EZR	TUBA1B
BAG6	KRT7	DDX19A	PDIA6	FAM120A	TUBB4B
BCAP31	KRT8	DDX20	PFKL	FAM98A	U2SURP
BCAS2	LIMD1	DDX21	PFKP	FIP1L1	UBAP2
BCL9L	MATR3	DDX23	PKP3	FLNA	UBAP2L
BIN1	MTREX	DDX39B	PPP1R13L	FMR1	WDR33
BRCC3	MYH9	DDX3X	PRPF19	FSCN1	XRN2
BSG	NIPBL	DDX42	RAB1A	FUBP3	YLPM1
BUB3	NONO	DDX46	RBM14	FXR1
C1QBP	NPM1	DDX5	RBMX	G3BP1
CACYBP	NUP93	DDX6	RTCB	G3BP2
CAD	P4HA1	DHCR24	RTRAF	GANAB
CALM3	PABPC1	DHCR7	RUVBL1	GIGYF2
CALR	PC	DHX15	RUVBL2	GPI
CANX	PCBP1	DHX29	SF3B1	HDLBP
CAP1	PCBP2	DHX36	SF3B2	HNRNPA0
CAPRIN1	PCMT1	DHX57	SF3B3	HNRNPA1
CAPZA1	PDIA6	DHX9	SFPQ	HNRNPA2B1
CARM1	PFKL	DIS3	SQSTM1	HNRNPA3
CBX3	PFKP	DRG1	TFG	HNRNPC
CCAR1	PKP3	DYNC1H1	TJP2	HNRNPF
CCAR2	PPP1R13L	EDC4	TNPO1	HNRNPH1
CCDC47	PRPF19	EEF1A1	TOP2A	HNRNPH2
CCT2	PRRC2A	EEF1D	TRIM28	HNRNPH3
CCT3	PRRC2B	EEF1G	TUBA1B	HNRNPK
CCT4	PRRC2C	EEF2	TUBA1C	HNRNPL
CCT5	RAB11A	EFTUD2	TUBB	HNRNPM
CCT7	RAB1A	EIF2S1	TUBB4B	HNRNPR
CCT8	RBM14	EIF3A	TUBB6	HNRNPU
CDC42	RBM17	EIF3B	U2SURP	HNRNPUL1
CDC5L	RBMX	EIF3C	UBAP2	HSPA1B
CDH1	RPL24	EIF3CL	UBAP2L	HSPA5
CDK1	RTCB	EIF3D	XRN2	IGF2BP1
CELF1	RTRAF	EIF3F	YLPM1	IGF2BP3
CGB1	RUVBL1	EIF3G		ILF3
CHAMP1	RUVBL2	EIF3L		IPO5
CHD4	SAFB	EIF4A1		KHDRBS1
CHERP	SEC23IP	EIF4A3		KIF5B
CIAO2B	SET	EIF4B		KPNA2
CLIC3	SF1	EIF4G1		LARP4
CLPX	SF3B1	EIF4G2		LDHA
CLTC	SF3B2	EIF4H		LIN28B
CNOT2	SF3B3	EIF5A		LRRC59
CNOT9	SFPQ	EIF5B		LSM12
COA7	SQSTM1	ELAVL1		LSM14A
COPB1	SRSF1	EPRS		MARS
COPB2	SRSF3	ESYT1		MATR3
COPG1	SRSF6	ETF1		MCM2
COPS8	SRSF7	EWSR1		MCM3
COPZ1	SYNPO	EZR		MCM4
CORO1C	TFG	FADS2		MCM5
COX4I1	THRAP3	FAM120A		MCM6
CPNE1	TJP2	FAM98A		MCM7
CPSF1	TNPO1	FEN1		MYH10
CPSF2	TOP2A	FIP1L1		MYH9
CPSF6	TRIM28	FKBP11		NAP1L1
CPSF7	TRIM71	FLNA		NONO
CPVL	TRIP6	FMR1		NUDT21
CRKL	TUBA1B	FNDC3A		NXF1
CRTC3	TUBA1C	FNDC3B		PABPC1
CSE1L	TUBB	FSCN1		PABPC4
CSNK2B	TUBB2B	FUBP1		PABPN1
CSTF1	TUBB4B	FUBP3		PARP1
CSTF2T	TUBB6	FUS		PCBP2
CSTF3	U2SURP	FXR1		PDCD6IP
CTNNA1	UBAP2	FXR2		PDIA3
CTNNB1	UBAP2L	G3BP1		PDIA4
CTNND1	UBQLN1	G3BP2		PDIA6
CTPS1	WDR33	GANAB		PFN1
CTSA	XRN2	GCN1		PGAM1
CYFIP1	YAP1	GDI2		POLDIP3
DARS	YLPM1	GEMIN5		POLR2B
DAZAP1	ZCCHC8	GIGYF2		POR
DBT	ZIKV NS5	GPI		PPIB
DCXR		GSPT1		PPP1CA
DDB1		GSTP1		PRDX6
DDOST		GTF2I		PRPF19
DDX1		HACD3		PRPF40A
DDX17		HDGF		PRPF8
DDX19A		HDLBP		PSPC1
DDX21		HELZ		PTBP1
DDX39A		HMGB1		PTBP3
DDX39B		HNRNPA0		PUF60
DDX3X		HNRNPA1		PUM2
DDX46		HNRNPA2B1		QARS
DDX5		HNRNPA3		QKI
DDX6		HNRNPAB		RAB1A
DHTKD1		HNRNPC		RAB1B
DHX15		HNRNPD		RAB7A
DHX9		HNRNPDL		RACK1
DIABLO		HNRNPF		RAN
DIAPH1		HNRNPH1		RAVER1
DLAT		HNRNPH2		RBM12
DNAJA1		HNRNPH3		RBM14
DNAJA2		HNRNPK		RBM25
DNAJB11		HNRNPL		RBM39
DNAJC10		HNRNPM		RBM4
DNAJC3		HNRNPR		RBM47
DNM2		HNRNPU		RBMS1
DSG2		HNRNPUL1		RBMX
DSP		HNRNPUL2		RPA1
DYNC1H1		HSPA1B		RPL10
DYNLL1		HSPA4		RPL8
DYNLRB1		HSPA5		RPN1
DYNLT1		HSPH1		RPN2
EDC4		IDH1		RPS10
EEF1A1		IGF2BP1		RPS13
EEF1B2		IGF2BP2		RPS14
EEF2		IGF2BP3		RPS18
EFTUD2		ILF2		RPS2
EGFR		ILF3		RPS3
EIF2S1		IPO5		RPS3A
EIF2S2		KHDRBS1		RPS4X
EIF2S3		KHSRP		RPS7
EIF3B		KIF1C		RPS9
EIF3CL		KIF5B		RPSA
EIF3D		KPNA2		RTCB
EIF3E		KPNB1		RUVBL2
EIF3F		KRT6A		SCFD1
EIF3G		KTN1		SEC22B
EIF3H		L1RE1		SEC24C
EIF3L		LARP1		SEC61B
EIF4A1		LARP4		SF3A1
EIF4A3		LARP4B		SF3A3
EIF4B		LDHA		SF3B1
EIF4E		LIG3		SF3B2
EIF4G1		LIN28B		SF3B3
EIF4G2		LRRC47		SFPQ
EIF5A2		LRRC59		SMARCA5
EIF5B		LSM12		SMC1A
ELAVL1		LSM14A		SMC3
ELOC		LSM14B		SMU1
ENO1		LUC7L2		SND1
EPN1		LUC7L3		SNRNP200
EPPK1		MAGT1		SNRNP70
EPRS		MAP4		SNRPA
EPS15L1		MARS		SNRPD1
EPS8L2		MATR3		SNRPN
ERH		MCM2		SON
ERLIN2		MCM3		SRRM2
ERP44		MCM4		SRRT
ESRP1		MCM5		SSB
ETF1		MCM6		STRAP
ETFA		MCM7		STT3A
ETFB		MDN1		SUPT16H
EXOSC2		MKI67		SUPT5H
EXOSC4		MOV10		TARDBP
EXOSC6		MSH6		TCERG1
EXOSC7		MTTP		TIA1
EXOSC8		MYH10		TIAL1
EZR		MYH9		TJP2
F11R		NAP1L1		TKT
FAF2		NCL		TLN1
FAM120A		NCOA5		TMPO
FAM98A		NME1-NME2		TNPO1
FAM98B		NONO		TNPO3
FARSA		NPM1		TOP2A
FASN		NUDT21		TRIM28
FBL		NUFIP2		TUBA1B
FBLN1		NXF1		TUBB4B
FBXO22		OLA1		U2AF2
FECH		P4HB		U2SURP
FIP1L1		PA2G4		UBAP2
FLNA		PABPC1		UBAP2L
FLNB		PABPC4		UGGT1
FMR1		PABPN1		UPF1
FSCN1		PARP1		USP10
FUBP3		PBXIP1		VARS
FXR1		PCBP2		VCL
G3BP1		PDCD6IP		VCP
G3BP2		PDIA3		XPO1
G6PD		PDIA4		XRCC5
GANAB		PDIA6		XRCC6
GAPDH		PDLIM5		XRN2
GART		PEG10		YLPM1
GBA		PFN1		YTHDF2
GCDH		PGAM1
GET3		PGD
GFPT1		PNN
GIGYF2		POLDIP3
GLDC		POLR2A
GLS		POLR2B
GM2A		POR
GNAI3		PPIA
GNB1		PPIB
GNB2		PPIL4
GOLGB1		PPP1CA
GPI		PRDX6
GRHL1		PRKDC
GRPEL1		PRMT1
GSE1		PRPF19
GTF2H2C		PRPF40A
GTF3C2		PRPF6
GTF3C4		PRPF8
GYS1		PRRC2A
H2AFV		PRRC2C
HADHA		PSPC1
HADHB		PTBP1
HCFC1		PTBP3
HDAC1		PUF60
HDAC2		PUM1
HDLBP		PUM2
HGS		PURA
HNRNPA0		PURB
HNRNPA1		QARS
HNRNPA2B1		QKI
HNRNPA3		RAB1A
HNRNPC		RAB1B
HNRNPF		RAB7A
HNRNPH1		RACK1
HNRNPH2		RALY
HNRNPH3		RAN
HNRNPK		RANBP1
HNRNPL		RAVER1
HNRNPM		RBM10
HNRNPR		RBM12
HNRNPU		RBM12B
HNRNPUL1		RBM14
HSD17B10		RBM15
HSD17B4		RBM25
HSDL2		RBM3
HSP90AA1		RBM39
HSP90AB1		RBM4
HSP90B1		RBM47
HSPA1B		RBM6
HSPA5		RBMS1
HSPA8		RBMX
HSPA9		RDX
HSPB8		RNMT
HSPD1		RPA1
HSPE1		RPL10
HSPG2		RPL10A
HUWE1		RPL13
HYOU1		RPL15
IARS1		RPL19
IDH2		RPL21
IGF2BP1		RPL23A
IGF2BP3		RPL24
IGF2R		RPL26
ILF3		RPL27
IMMT		RPL3
IMPDH2		RPL4
INF2		RPL5
IPO5		RPL6
IPO7		RPL7
IPO9		RPL7A
IQGAP1		RPL8
ITGB1		RPN1
ITGB4		RPN2
ITSN1		RPS10
JUP		RPS13
KARS		RPS14
KDM1A		RPS16
KHDRBS1		RPS17
KIAA1217		RPS18
KIF4A		RPS19
KIF5B		RPS2
KLC1		RPS27A
KPNA2		RPS3
KRT10		RPS3A
KRT18		RPS4X
LAMA1		RPS6
LAMA5		RPS6KA3
LAMB1		RPS7
LAMB2		RPS8
LAMC1		RPS9
LARP4		RPSA
LARS		RRBP1
LCP1		RTCB
LDHA		RUVBL2
LDHB		SAFB
LIMD1		SAFB2
LIN28B		SART1
LMAN1		SART3
LMAN2		SCFD1
LMNA		SEC22B
LMNB1		SEC24C
LMNB2		SEC61A1
LONP1		SEC61B
LRP1		SEC63
LRP2		SERBP1
LRPPRC		SF1
LRRC59		SF3A1
LSM12		SF3A3
LSM14A		SF3B1
LYPLA2		SF3B2
MAN2A1		SF3B3
MARS		SFPQ
MAT2A		SKIV2L2
MATR3		SLC39A7
MBNL2		SLTM
MBNL3		SMARCA1
MCCC1		SMARCA5
mCherry		SMC1A
MCM2		SMC3
MCM3		SMU1
MCM4		SND1
MCM5		SNRNP200
MCM6		SNRNP70
MCM7		SNRPA
MCMBP		SNRPD1
MDH2		SNRPN
MIA3		SON
MICALL1		SPATS2
MIF		SPATS2L
MMP14		SRP68
MOGS		SRP72
MRPS23		SRRM2
MRPS31		SRRT
MSH2		SRSF1
MT-CO2		SRSF10
MTHFD1		SRSF2
MTHFD2		SRSF3
MTREX		SRSF6
MYCBP		SRSF7
MYH10		SRSF9
MYH9		SSB
MYL12A		SSR4
NACA		STAU1
NAP1L1		STRAP
NCAPH		STRBP
NCKAP1		STT3A
NCOR2		STT3B
NFKB1		SUGP2
NFYC		SUPT16H
NGDN		SUPT5H
NIBAN2		SUPT6H
NLRP2		SURF4
NOL6		SYMPK
NOLC1		SYNCRIP
NOMO3		TAF15
NONO		TARDBP
NOP58		TCERG1
NRAS		THRAP3
NS5		TIA1
NSDHL		TIAL1
NSF		TJP2
NSUN2		TKT
NUDC		TLN1
NUDT21		TMEM214
NUMB		TMPO
NUP155		TMX2
NUP188		TNPO1
NUP210		TNPO2
NUP214		TNPO3
NUP35		TNRC6B
NUP50		TOP1
NUP54		TOP2A
NUP88		TOP2B
NUP93		TOP3B
NUP98		TPR
NXF1		TRA2A
OGDH		TRA2B
OGT		TRAM1
OS9		TRIM25
P3H2		TRIM28
P4HA1		TRIM56
P4HA2		TRIM71
PABPC1		TUBA1B
PABPC4		TUBB2A
PABPN1		TUBB4B
PACSIN2		U2AF1L5
PAFAH1B2		U2AF2
PAICS		U2SURP
PAK4		UBA1
PALLD		UBAP2
PARP1		UBAP2L
PC		UBR4
PCBP1		UGGT1
PCBP2		UPF1
PCCA		USP10
PCCB		USP39
PCF11		USP5
PCMT1		USP7
PCNA		USP9X
PDCD6IP		VARS
PDHA1		VCL
PDHB		VCP
PDIA3		VIL1
PDIA4		Viral_Flavi_Dengue_Serotype2_16681strain
PDIA6		Viral_Flavi_Zika_MR766strain
PEF1		WBP11
PELP1		WDR1
PFDN5		WDR33
PFKL		XPO1
PFKP		XRCC5
PFN1		XRCC6
PGAM1		XRN2
PGK1		YBX1
PGRMC1		YBX3
PHB1		YLPM1
PHB2		YTHDC1
PHGDH		YTHDC2
PICALM		YTHDF2
PKM		YTHDF3
PKP3		ZC3H11A
PLAA		ZC3H14
PLEC		ZC3H4
PMPCA		ZC3H7B
POLDIP3		ZC3HAV1
POLR1C		ZCCHC3
POLR2B		ZFR
POLR2C		ZNF326
POLR2E		ZNF638
POLR2J
POLR2L
POR
PPIB
PPIH
PPIL1
PPIP5K2
PPM1G
PPP1CA
PPP1CB
PPP1R13L
PPP2CA
PPP2R1A
PPP3CA
PPT1
PRCC
PRDX1
PRDX2
PRDX3
PRDX6
prM
PRMT5
PRPF19
PRPF38A
PRPF40A
PRPF8
PRPS1
PRRC1
PRSS8
PSMC1
PSMC2
PSMC3
PSMC4
PSMC5
PSMC6
PSMD1
PSMD10
PSMD11
PSMD12
PSMD13
PSMD14
PSMD2
PSMD3
PSMD4
PSMD6
PSMD7
PSME1
PSME2
PSME3
PSPC1
PTBP1
PTBP3
PTGES3
PTMA
PUF60
PUM2
PWP2
QARS
QKI
RAB10
RAB11B
RAB14
RAB18
RAB1A
RAB1B
RAB2A
RAB5C
RAB6A
RAB7A
RAC1
RACK1
RAE1
RAN
RANBP2
RANGAP1
RARS
RAVER1
RBBP4
RBBP7
RBM12
RBM14
RBM22
RBM25
RBM39
RBM4
RBM47
RBMS1
RBMX
RBPMS
RCOR1
RHOA
RNF2
RNH1
RPA1
RPA3
RPL10
RPL11
RPL12
RPL17
RPL22
RPL23
RPL28
RPL38
RPL8
RPL9
RPLP0
RPLP1
RPN1
RPN2
RPS10
RPS11
RPS13
RPS14
RPS15
RPS15A
RPS18
RPS2
RPS23
RPS3
RPS3A
RPS4X
RPS5
RPS7
RPS9
RPSA
RTCB
RTKN
RTN4
RTRAF
RUVBL1
RUVBL2
S100A10
SALL4
SAR1A
SARS1
SCAF8
SCFD1
SDF2
SDF2L1
SDHA
SDHB
SEC13
SEC22B
SEC23B
SEC24C
SEC31A
SEC61B
SEH1L
SELENOF
SEMA4C
SEPTIN11
SEPTIN2
SEPTIN7
SEPTIN9
SERPINH1
SF3A1
SF3A2
SF3A3
SF3B1
SF3B2
SF3B3
SF3B4
SF3B6
SFPQ
SH3GLB2
SHMT2
SKP1
SLC25A5
SLC2A1
SLC2A3
SLC3A2
SLC7A5
SMARCA5
SMARCC1
SMARCC2
SMARCE1
SMC1A
SMC2
SMC3
SMC4
SMU1
SNAP23
SND1
SNRNP200
SNRNP40
SNRNP70
SNRPA
SNRPA1
SNRPC
SNRPD1
SNRPD2
SNRPD3
SNRPE
SNRPF
SNRPG
SNRPN
SNU13
SNX2
SNX5
SNX6
SON
SPAG9
SPTBN1
SQSTM1
SRI
SRP14
SRRM2
SRRT
SRSF11
SSB
SSR1
SSRP1
ST13
STAM
STIP1
STOML2
STRAP
STRN
STRN3
STT3A
SUB1
SUCLG1
SUGT1
SUPT16H
SUPT5H
SYNE2
TARDBP
TCERG1
TCP1
TENM3
TFAP2C
TFG
TFRC
TGOLN2
THOC5
THOC6
THOC7
TIA1
TIAL1
TIMM13
TINAGL1
TJP2
TKT
TLN1
TMED10
TMED9
TMPO
TNPO1
TNPO3
TOP2A
TOR1AIP1
TPD52L2
TPP1
TRAP1
TRIM28
TRIP11
TRRAP
TTC1
TUBA1B
TUBA1C
TUBB
TUBB4A
TUBB4B
TUBB6
TUBG1
TUFM
U2AF1
U2AF2
U2SURP
UBAP2
UBAP2L
UBE2D3
UBE2N
UGGT1
UGP2
UPF1
UQCRC1
UQCRC2
USP10
USP15
VAPA
VAPB
VARS
VAT1
VCL
VCP
VDAC1
VDAC2
VPS37C
WARS
WDR18
WDR43
WDR5
WDR75
WDR82
WTAP
XPO1
XRCC5
XRCC6
XRN2
YARS1
YLPM1
YTHDF1
YTHDF2
YWHAB
YWHAE
YWHAH
YWHAQ
YWHAZ
ZNF207

## Sheet: CHIKV
2025 CHIKV-MFP_U2OS (271)	Kim et al 2020. VIR-Clasp_U2OS (486)	Gebhart et al., 2020 CLAMP_HEK293 (262)	CHIKV_MFP vs. Kim et al 2020. Common hits (79)	CHIKV_MFP vs. Gebhart et al 2020. Common hits (26)	Kim et al 2020. vs. Gebhart et al 2020. Common hits (35)	CHIKV-MFP vs. Kim et al 2020. vs. Gebhart et al 2020. Common hits (9)
AATF	AAK1	AAMP	ADAR	CBX3	ACLY	DHX9
ACTN1	ABCB7	ACAT1	AHCTF1	CLTA	AIFM1	EPB41L2
ADAR	ABCE1	ACLY	AP2M1	DHX9	ALDOA	FLNA
AHCTF1	ABCF1	ADI1	ARHGEF17	EPB41L2	ATP2A2	HSD17B4
AKAP8	ABLIM1	ADRM1	ARID1B	FLNA	CDC42	SLC25A3
ALDH18A1	ACLY	ADSS	ATXN2L	HADHB	DHX9	SLC25A5
AP2M1	ACO1	AHCY	BUB3	HNRNPK	EPB41L2	VDAC2
APMAP	ACOT7	AIFM1	CAD	HNRNPM	EPB41L3	XRCC6
ARHGEF17	ACOT9	AK2	CHD4	HSD17B4	FLNA
ARHGEF2	ADAR	AKAP12	CLTC	IDH3A	FSCN1
ARID1A	ADD3	AKR1B1	COPA	KPNB1	GART
ARID1B	ADNP	ALDH1B1	COPB1	NUDC	HCFC1
ARID2	AFDN	ALDH2	Cp	PGRMC1	HNRNPA1
ASPH	AFF4	ALDH9A1	DDOST	PHGDH	HNRNPA2B1
ATXN2	AHCTF1	ALDOA	DDX21	PSMC2	HSD17B4
ATXN2L	AHNAK	ANP32A	DDX3X	PSMC3	KIF5B
BCAS2	AHNAK2	ARL2BP	DDX46	SLC25A3	MAP4
BCL9L	AHSA1	ASRGL1	DHX15	SLC25A5	MAT2A
BRK1	AIFM1	ATP1A1	DHX9	TFG	MCM3
BUB3	AKAP2	ATP2A2	DYNC1I2	TPD52L2	MTHFD1
CAD	ALDOA	ATP5B	E2	TUBB2A	NCL
CALR	ANKRD17	ATP5D	EEF1G	TUBB4B	NPM1
CANX	ANLN	ATP5H	EIF3A	TUBB6	PARP1
CBX3	ANXA2	ATP5O	EIF4G1	VDAC2	PFAS
CCAR2	AP2B1	B2M	EPB41L2	XRCC6	PGK1
CCN1	AP2M1	BLVRA	ESYT1		PRDX6
CCT6A	AP3B1	BOLA2	FASN		RAN
CD44	APC	BPNT1	FBL		SLC25A3
CDC42EP1	APEH	C1QBP	FLNA		SLC25A5
CDC5L	AQR	C9orf142	FLNB		SNRPD1
CENPT	ARAP1	CALM1	FLNC		TARS
CEP131	ARCN1	CAPNS1	HADHA		TUFM
CHD4	ARFGAP2	CBX3	HNRNPU		VCP
CHRAC1	ARFGAP3	CCT2	HSD17B4		VDAC2
CKAP4	ARHGAP29	CCT7	HSPA8		XRCC6
CLPX	ARHGEF17	CDC37	KIAA1671
CLTA	ARID1B	CDC42	LMNB1
CLTC	ARL1	CHCHD2P9	LRPPRC
COPA	ARL6IP5	CHCHD4	MCM5
COPB1	ARPC1A	CKB	MCM7
Cp	ASNS	CLIC1	MDC1
CSTF1	ASS1	CLNS1A	MKI67
CTNNB1	ATIC	CLTA	MOGS
CTNND1	ATP2A2	CMPK1	MYH9
CTPS1	ATXN2L	CNBP	NCOR2
CYB5R3	BCLAF1	COA4	NUP98
DBR1	BMP2K	COA7	PDCD11
DDOST	BMS1	COMT	PFKL
DDX17	BOP1	COPRS	PLEC
DDX21	BUB3	COX17	POLR2A
DDX3X	BUD13	COX5A	PPP1R10
DDX46	CAD	CTSB	PRRC2C
DDX5	CAMSAP1	CUEDC2	PSMD1
DHX15	CAP1	CYCS	RAB10
DHX9	Cp	DBNL	RBM25
DNAJA1	CCAR1	DCTPP1	RPN1
DNAJA3	CCNT1	DDAH1	RPS24
DNAJC10	CDC20	DHX9	RRBP1
DPY30	CDC42	DLD	SCRIB
DYNC1I2	CDC73	DNASE2	SEC31A
E2	CEP170	DUT	SLC25A3
EEF1G	CHD4	ECHS1	SLC25A5
EIF3A	CHORDC1	EDF1	SLTM
EIF4A1	CKAP5	EIF1AY	SMARCA4
EIF4G1	CLPTM1L	EIF2S3	SMC1A
EPB41L2	CLTC	EIF4H	SUPT16H
EPRS1	CMTR1	EPB41L2	TJP1
ESYT1	CNDP2	EPB41L3	TLN1
FADS2	CNOT1	FAH	TNRC6B
FAM120A	COL12A1	FKBP10	TNS1
FAM98A	COL1A1	FKBP1A	TOP2B
FASN	COL4A2	FKBP4	UBAP2L
FBL	COPA	FLNA	VDAC2
FLNA	COPB1	FSCN1	WDR33
FLNB	COPB2	GART	XRCC5
FLNC	COPG1	GEMIN6	XRCC6
FNDC3B	CPNE3	GGH	XRN2
FOXK1	CPSF1	GON7	YLPM1
GATAD2B	DARS	GRPEL1	ZFR
GIMAP8	DCAF13	HADHB
GLI2	DCD	HCFC1
GPC1	DCP1B	HDDC2
H2AC4	DDB1	HIBADH
H3C1	DDOST	HINT1
HADHA	DDX1	HIST1H1C
HADHB	DDX21	HIST1H1E
HDAC2	DDX27	HLA-B
HNRNPK	DDX31	HNRNPA1
HNRNPM	DDX3X	HNRNPA2B1
HNRNPU	DDX42	HNRNPAB
HNRNPUL1	DDX46	HNRNPK
HSD17B4	DDX54	HNRNPM
HSPA1B	DHX15	HSD17B4
HSPA8	DHX16	HSP90AB3P
HSPB8	DHX29	HSPA1A
IDH3A	DHX30	HSPA9
IKBIP	DHX36	HSPE1
ILF2	DHX38	HSPH1
IRF2BPL	DHX9	IARS2
ITGA3	DIS3	IDH3A
KHDRBS1	DNAJC11	IGF2R
KIAA1671	DNM1	IMPDH2
KPNB1	DNMT1	ISCA2
KRT18	DST	ISYNA1
KRT5	DYNC1H1	JPT2
KRT75	DYNC1I2	KCTD12
KTN1	E1	KIF5B
LAMTOR1	E2	KPNB1
LARP4	ECPAS	LAP3
LIG1	EEF1A2	LETM1
LMNB1	EEF1G	LGALS1
LOXL4	EEF2	LRRFIP2
LRPPRC	EFL1	LZIC
LRRC59	EHBP1L1	MAP4
LSM12	EIF2A	MARCKS
MAGED2	EIF2AK2	MARCKSL1
MATR3	EIF3A	MAT2A
MCM5	EIF3G	MCM2
MCM7	EIF4G1	MCM3
MCRIP1	EIF4G3	MDH2
MDC1	EIF5B	MTHFD1
MEF2D	ELMSAN1	MYL12B
METTL21A	ELOVL1	NACA
MISP	ELOVL5	NAP1L4
MKI67	EMC1	NCAM1
MLEC	ENO1	NCL
MOGS	EPB41L2	NDRG1
MRPL43	EPB41L3	NDUFAB1
MTA2	EPRS	NDUFV1
MYEF2	ESYT1	NENF
MYH9	ESYT2	NFU1
NCAPG	EXOSC10	NPEPPS
NCOR2	EZR	NPM1
NDUFA5	FASN	NUDC
NDUFS8	FBL	NUDCD2
NES	FERMT2	OAT
NOP10	FLII	PAFAH1B3
NOP58	FLNA	PAIP2B
NOTCH2	FLNB	PARP1
NSP2	FLNC	PBDC1
NUDC	FN1	PCBD1
NUFIP2	FOXK2	PCBP1
NUP54	FRYL	PCBP2
NUP85	FSCN1	PCMT1
NUP93	FTSJ3	PCNA
NUP98	FXR1	PCNP
P4HA1	G6PD	PDCD5
P4HA2	GALNT2	PDIA4
PC	GANAB	PDLIM1
PCF11	GAPDH	PEA15
PDCD11	GART	PEX19
PFKL	GCN1	PFAS
PFKP	GDI2	PFDN1
PGRMC1	GGCT	PFDN2
PHB2	GHITM	PFDN5
PHGDH	GOLT1B	PFN2
PLEC	GPHN	PGK1
PLEKHA5	GSE1	PGRMC1
PML	GSN	PHGDH
POGZ	GTF3C3	PHPT1
POLR2A	HACD3	PIN1
PPP1R10	HADHA	PMPCA
PPP1R13L	HCFC1	PMPCB
PRPF19	HDLBP	POLR2H
PRRC2A	HEATR1	PPA1
PRRC2C	HECTD1	PPM1G
PSMC2	HK1	PPP1R14B
PSMC3	HNRNPA1	PPP1R2
PSMC4	HNRNPA2B1	PPP2R1A
PSMC5	HNRNPA3	PRDX3
PSMD1	HNRNPL	PRDX6
PSMD2	HNRNPLL	PRKAR2A
PUM1	HNRNPU	PRKCSH
PUSL1	HSD17B4	PRMT5
PYCR1	HSP90AB1	PSMA1
RAB10	HSPA8	PSMA2
RAB11B	HUWE1	PSMA4
RALY	IARS	PSMA5
RANBP2	IFI16	PSMA6
RARS1	ILF3	PSMA7
RAVER1	INF2	PSMB2
RBFOX2	INPPL1	PSMB3
RBM17	INTS12	PSMB4
RBM25	IQGAP1	PSMB5
RHOC	IQGAP3	PSMB6
RIOX1	JUP	PSMB7
RNF20	KDM1A	PSMC2
RNF40	KIAA1217	PSMC3
RPL10	KIAA1671	PSMD9
RPL23	KIDINS220	RAD23A
RPL24	KIF13A	RAD23B
RPL38	KIF23	RAN
RPLP0	KIF3B	RBM3
RPN1	KIF4A	RBM8A
RPS24	KIF5B	RGS10
RPS27A	LARP1	RNPEP
RRBP1	LARS	RPIA
RUNX1	LBR	RPL29
RUNX2	LDHA	RPS21
RUVBL1	LDHB	S100A11
RUVBL2	LIMA1	SAE1
SALL2	LIMCH1	SDHA
SCAF11	LMAN1	SETD7
SCRIB	LMF2	SFPQ
SEC31A	LMNA	SGTA
SEPTIN9	LMNB1	SH3GL1
SF3B1	LMO7	SHMT2
SIPA1L1	LPCAT3	SKP1
SLC25A3	LRPPRC	SLC25A11
SLC25A5	LTN1	SLC25A3
SLTM	LUZP1	SLC25A5
SMARCA4	MACF1	SNRPD1
SMARCC1	MAP1A	SNRPD3
SMARCC2	MAP4	SNRPF
SMC1A	MAT2A	SOD1
SNRPD2	MBOAT7	SOD2
SON	MCM3	SRI
SPTBN1	MCM5	SSB
SRPRB	MCM7	SSBP1
SRSF5	MDC1	ST13
SS18	MED1	STIP1
STRN3	MICAL2	STRAP
SUPT16H	MKI67	STUB1
SYNE2	MOGS	STX7
TCF12	MOV10	SUB1
TCF20	MSH6	SYAP1
TCF4	MSN	TAF10
TFG	MTHFD1	TARS
TJP1	MTHFD1L	TBC1D10B
TLN1	MTOR	TBCB
TMPO	MTREX	TCP1
TMX1	MVP	TFAM
TNRC6B	MYADM	TFG
TNS1	MYBBP1A	TIMM13
TOP2B	MYH10	TIMM8A
TOR1AIP1	MYH14	TIMM8B
TPD52L2	MYH9	TIPIN
TRIM28	MYO1B	TPD52L2
TRRAP	MYO1C	TPM4
TTC1	MYO1D	TPP2
TUBA1C	MYO6	TRAP1
TUBA3D	NAT10	TUBB2A
TUBB	NBN	TUBB4B
TUBB2A	NCAPD2	TUBB6
TUBB2B	NCL	TUFM
TUBB3	NCOR2	TXNDC5
TUBB4B	NEDD1	UBQLN2
TUBB6	NEMF	UBQLN4
TUBB8	NEPRO	UBXN7
UBAP2	NF2	UCHL3
UBAP2L	NGLY1	UQCRC1
UBXN4	NNT	UQCRC2
VAPA	NOL10	USP14
VAT1	NOL6	VCP
VDAC1	NOLC1	VDAC2
VDAC2	NONO	XRCC6
VIM	NOP14	YBX1
WAC	NOP2	YWHAB
WBP4	NPLOC4	YWHAG
WDR33	NPM1	YWHAQ
WDR5	NSF	YWHAZ
WIZ	NUMA1	ZNF428
WWTR1	NUP155
XRCC5	NUP188
XRCC6	NUP205
XRN2	NUP210
YLPM1	NUP214
ZFR	NUP98
ZMYM3	OSBPL8
ZNF462	OSBPL9
ZNF638	PABPC4
	PAFAH1B1
	PAICS
	PALLD
	PALM2-AKAP2
	PARD3
	PARP1
	PBRM1
	PDCD11
	PDLIM5
	PDLIM7
	PDPR
	PEPD
	PFAS
	PFKL
	PFN1
	PGK1
	PHACTR4
	PHLDB1
	PHLDB2
	PIGK
	PKM
	PLAA
	PLCD3
	PLCG1
	PLEC
	PLEKHG3
	PLRG1
	POLD1
	POLR1A
	POLR2A
	POLR2B
	POP1
	PPAT
	PPP1R10
	PPWD1
	PRDX2
	PRDX6
	PREP
	PRKDC
	PRPF3
	PRPF4B
	PRPF8
	PRRC2C
	PSMD1
	PSMD3
	PTBP1
	PTDSS1
	PTK2
	Q6ZSR9
	QARS
	QSER1
	RAB10
	RAB11FIP5
	RAB21
	RAB2A
	RACK1
	RAN
	RBM12
	RBM12B
	RBM15
	RBM25
	RBM26
	RBM27
	RBM28
	RBM33
	RBM34
	RCC1
	RCC2
	RECQL
	RELA
	RER1
	RFC1
	RIF1
	RPA1
	RPL11
	RPL13
	RPL13A
	RPL15
	RPL18A
	RPL22
	RPL27A
	RPL3
	RPL4
	RPL5
	RPL6
	RPL7
	RPL7A
	RPN1
	RPS16
	RPS23
	RPS24
	RPS6
	RPS7
	RPS8
	RRBP1
	RRP12
	RRP9
	RSL1D1
	S100A9
	SAFB2
	SAMM50
	SAP130
	SCRIB
	SEC16A
	SEC23A
	SEC24B
	SEC24C
	SEC31A
	SEPT2
	SEPT9
	SERPINH1
	SF3B3
	SH3PXD2B
	SHROOM3
	SIN3A
	SIPA1
	SLC25A3
	SLC25A5
	SLC25A6
	SLC2A1
	SLC3A2
	SLC7A5
	SLTM
	SMARCA1
	SMARCA2
	SMARCA4
	SMC1A
	SMC2
	SMC4
	SMCHD1
	SMTN
	SMU1
	SND1
	SNRNP200
	SNRPD1
	SRPRA
	SRRM1
	SRRM2
	SSRP1
	STAT3
	STT3A
	STT3B
	SUPT16H
	SURF4
	SVIL
	SYNPO
	TARDBP
	TARS
	TBC1D1
	TBL3
	TCOF1
	TECR
	TFRC
	TGM2
	THOC2
	THRAP3
	TJP1
	TJP2
	TKT
	TLN1
	TM9SF4
	TNKS1BP1
	TNRC6B
	TNS1
	TOMM40
	TOP2A
	TOP2B
	TPR
	TPX2
	TRIM25
	TSR1
	TUFM
	UBA1
	UBA2
	UBA6
	UBAP2L
	UBR4
	UBR5
	UGDH
	UGGT1
	UGP2
	UPF1
	USP10
	USP5
	USP7
	UTP15
	UTP20
	UTP4
	VARS
	VASP
	VCP
	VDAC2
	VIRMA
	WASHC2A
	WASHC2C
	WDR1
	WDR13
	WDR3
	WDR33
	WDR36
	WDR75
	WFS1
	XRCC5
	XRCC6
	XRN1
	XRN2
	YARS
	YKT6
	YLPM1
	YTHDF2
	YTHDF3
	ZC3H11A
	ZC3HAV1
	ZDHHC5
	ZFR
