# Supplementary material for: Live Imaging and Interactome Analysis of Zika and Chikungunya Viral RNAs Via Dual-Action Aptamer Tag.
Source: Research Square preprint supplement (doi:10.21203/rs.3.rs-6992950/v1), 2025-07-07
Supplement: Supplementary file 3 [file e0a631ca1f3697c3b09d6126.xlsx]

## Sheet: shRNA sequences and primers
Target protein	shRNA sequence	Forward qRT primer	Reverse qRT primer
ARID3A	CCCTAAGATCAAGAAAGAGGA	CCCGCCCCTAAGATCAAGAA	GTTGATCTCCACCGACATGC
BRD4	CCTGGAGATGACATAGTCTTA	GTGGTGCACATCATCCAGTC	CCGACTCTGAGGACGAGAAG
COPA	CCGTGAGTACATTGTGGGTTT	GAAGGCACCATTGCCAGCAAAG	CCTTCTGTAGCCTCCACAAACC
CTNND1	CTCCCAATGTTGCCAACAATA	ACCACGGTCAAGAAAGTAG	GAAATCACGACCCAAAGT
DDX21	CCTGAGGTTGATTTGGTTATA	CCTTTCAGGGTGATTTCCCTTT	TCATCAAGGACGCACTATCATCT
DDX5	GCTCCTATTCTGATTGCTACA	GCTTGCTGAAGATTTCCTGAAAGAC	TCTCACTCATGATCTCTTCCATTAGAC
EIF4G1	GCCCTTGTAGTGACCTTAGAA	TTGTGGATGATGGTGGCT	TTATCTGTGCTTTCTGTGGGT
FASN	CATGGAGCGTATCTGTGAGAA	CTTCCGAGATTCCATCCTACGC	TGGCAGTCAGGCTCACAAACG
FXR1	CGCCAGGTTCCATTTAATGAA	GGTTGGCTAAAGTTCGGATG	TAGCACACGCCTCTCTCAAA
PABPC1	CCAGACCTCATCCATTCCAAA	AGCAAATGTTGGGTGAACGG	ACCGGTGGCACTGTTAACTG
PACSIN2	CGCTTGGACAACGGGCAAGTT	GAGAAACGCCTTCGCTTCTTC	GATTGGCTCGGAACCACCTC
PLEC	GCACCAGTCCATCGAAGAATT	CTGCGTAGGAAATACAGTT	CAGCTGTTCCTTCTCGTCCT
PUM2	CCTAATCCTACAGCTAATAAA	ATCAGGGTCAGCAAGGGCAG	GCTGCTGTGGTGGCTGAGTG
QARS	CCACACACCATGAATCTACTA	GGATAGACGACCTTGGAGCG	GACTCCGCACATACTCAAGG
RBM47	CGCTTGACTATTTATGAAGAA	ATCAGCAATCCTTGGCTCAC	CCTTGGGATTCCTCTGTTCA
SFPQ	CGGTTGTTTGTTGGGAATCTA	GAGGAGAAGATCTCGGACTCG	CGACATCGCTGTGTGTAAGTTT
TJP2	ATAGAGTCAAACCGATCATTT	GAGACAACCCCCACTTTGAA	GCTGAACTGCAAACGAATGA
TMPO	CTTGTGAAATACGGAGTGAAT	GTGACAATGAAGAAGGAAAG	GGTAGGTCTCCCTTAGAAG
TUBB3	CGAGATGTACGAAGACGACGA	GAGATGGAGTTCACCGAGGC	TCGTCTTCGTACATCTCGCC
YTHDF1	CCCTACCTGTCCAGCTATTAC	ACCTGTCCAGCTATTACCCG	TGGTGAGGTATGGAATCGGAG
β-actin	NA	TTAGTTGCGTTACACCCTTTCTTG	TCACCTTCACCGTTCCAGTTT
CHIKV	NA	AAAGGGCAAACTCAGCTTCAC	GCCTGGGCTCATCGTTATTC
ZIKV	NA	TTGGTCATGATACTGCTGATTGC	CCCTCCACGAAGTCTCTATTGC
SCR		NA	NA

## Sheet: Insert sequences
Insert	Sequence
Mango (M)	TGCCAAGAAAGGCACGTACGAAGGAGAGGAGAGGAAGAGGAGAGTACGTGCTTTTTGGACATGCCGGCACGTACGAAGGAAGGAGAGGAAGAGGAGAGGCATGTCCTTTTTGGGTGCATCGAAGGAGAGGAGAGGAAGAGGAGAGATGCACCCTTTTT
Mango-mCherry (MFP)	TGCCAAGAAAGGCACGTACGAAGGAGAGGAGAGGAAGAGGAGAGTACGTGCTTTTTGGACATGCCGGCACGTACGAAGGAGAGGAGAGGAAGAGGAGAGGCATGTCCTTTTTGGGTGCATCGAAGGAGAGGAGAGGAAGAGGAGAGATGCACCCTTTTTGCGCGCTGCATGGTGAGCAAGGGCGAGGAGGATAACATGGCCATCATCAAGGAGTTCATGCGCTTCAAGGTGCACATGGAGGGCTCCGTGAACGGCCACGAGTTCGAGATCGAGGGCGAGGGCGAGGGCCGCCCCTACGAGGGCACCCAGACCGCCAAGCTGAAGGTGACCAAGGGTGGCCCCCTGCCCTTCGCCTGGGACATCCTGTCCCCTCAGTTCATGTACGGCTCCAAGGCCTAC…
Virus protein	Insert location	^ insertion site
ZIKV NS1-NS2A	AGGCCCAGGAAAGAACCAGAGAGCAACTTAGTGAGGTCAATGGTGACAGCGGGGTCAACCGATCATATG^GGAAGTACTGACCACATGGACCACTTCTCTCTTGGAGTGCTTGTGATTCTACTCATGGTGCAGGAGGGGTTG	NS1 5' end
		Cleavage site
		NS2A 3' end
CHIKV nsP3	TGGATGCTGACGCCCCAGCCCTAGAACCGGCCCTAGACGACGGGGCGGTACATACATTACCAACCATAATCGGAA^AACCTTGCGGCCGTGTCTGACTGGGTAATGAGCACCGTACCTGTCGCGCCGCCTAGAAGAAGGAG	nsP3 upstream
		nsP3 downstream
