# Supplementary material for: Live Imaging and Interactome Analysis of Zika and Chikungunya Viral RNAs Via Dual-Action Aptamer Tag.
Source: Research Square preprint supplement (doi:10.21203/rs.3.rs-6992950/v1), 2025-07-07
Supplement: Supplementary file 4 [file f03613f46388f76c73425f7f.xlsx]

## Sheet: Legend
Supplementary Table 1 - Mass Spectrometry results vgRNA pulldown from ZIKV infected cells
		Column	Description
	Sheet: ZIKV-M	A	Accession number of identified protein
	Colors	B	Alternate ID of identified protein
	Selected protein of interest	C-E	Total spectrum counts from 3 replicate ZIKV-M vgRNA pulldown samples
	Viral protein	F-H	Total spectrum counts from 3 replicate mock infection pulldown samples
		I-K	Total spectrum counts from 3 replicate untagged ZIKV vgRNA pulldown samples
		L	Fold change of ZIKV-M over mock infection, Average value [Log 2 ((C-E))/(F-H))]
		M	Significance of FC in column L calculated using PRISM, Log 10 (Pvalue)
		N	Fold change of ZIKV-M over untagged ZIKV infection, Average value [Log 2 ((C-E))/(I-K))]
		O	Significance of FC in column N calculated using PRISM, Log 10 (Pvalue)
	Sheet: ZIKV-MFP	A	Accession number of identified protein
	Colors	B	Alternate ID of identified protein
	Selected protein of interest	C-E	Total spectrum counts from 3 replicate ZIKV-MFP vgRNA pulldown samples
	Viral protein	F-H	Total spectrum counts from 3 replicate mock infection pulldown samples
		I-K	Total spectrum counts from 3 replicate untagged ZIKV vgRNA pulldown samples
		L	Fold change of ZIKV-MFP over mock infection, Average value [Log 2 ((C-E))/(F-H))]
		M	Significance of FC in column L calculated using PRISM, Log 10 (Pvalue)
		N	Fold change of ZIKV-MFP over untagged ZIKV infection, Average value [Log 2 ((C-E))/(I-K))]
		O	Significance of FC in column N calculated using PRISM, Log 10 (Pvalue)
	Sheet: CHIKV-MFP	A	Accession number of identified protein
	Colors	B	Alternate ID of identified protein
	Selected protein of interest	C-E	Abundance values from 3 replicate CHIKV-MFP vgRNA pulldown samples
	Viral protein	F-H	Abundance values from 3 replicate mock infection vgRNA pulldown samples
		I-K	Abundance values from 3 replicate untagged CHIKV vgRNA pulldown samples
		L	Fold change of CHIKV-MFP over mock infection, Average value [Log 2 ((C-E))/(F-H))]
		M	Significance of FC in column L calculated using PRISM, Log 10 (Pvalue)
		N	Fold change of ZIKV-M over untagged CHIKV infection, Average value [Log 2 ((C-E))/(I-K))]
		O	Significance of FC in column N calculated using PRISM, Log 10 (Pvalue)

## Sheet: ZIKV_M
Accession Number	Alternate ID	ZIKV-M total spectrum counts			Mock infection total spectrum counts			ZIKV infected total spectrum counts			log2 (FC/Mock)	negative log10 pvalue (FC/Mock)	log2 (FC/ZIKV)	negative log10 pvalue (FC/ZIKV)
P07437	TUBB	130	91	79	0	0	0	37	30	27	6.64386	2.53805	1.67423	1.92537
P68371	TUBB4B	131	86	76	0	0	0	39	31	28	6.60979	2.34998	1.58005	1.70854
P05787	KRT8	93	80	55	9	10	10	36	24	26	7.41785	2.39653	1.40663	1.80233
Q9BVA1	TUBB2B	104	66	0	0	0	0	0	0	0	5.82443	0.867744	5.82443	0.867744
P68363	TUBA1B	73	61	57	0	0	0	23	25	25	5.99247	3.72584	1.3876	2.89963
Q9BQE3	TUBA1C	60	52	50	0	0	0	21	21	21	5.75489	4.22185	1.36257	3.37986
P08727	KRT19	48	46	36	0	0	1	23	19	14	6.60733	3.49214	1.21501	2.25641
ASK51714.1	ZIKV NS5	68	52	34	0	0	0	15	8	6	5.68182	2.19409	2.40881	1.82391
P38646	HSPA9	36	25	21	14	18	19	23	15	11	3.77259	1.024	0.742842	0.899209
P23246	SFPQ	31	23	24	17	15	22	16	13	9	3.2854	1.15191	1.03747	1.83729
P05783	KRT18	41	34	25	0	0	0	22	16	15	5.05889	2.70465	0.915936	1.4239
Q96I24	FUBP3	46	33	27	2	3	7	16	8	9	4.14296	2.24222	1.68353	1.77749
Q00839	HNRNPU	50	35	31	0	0	0	15	7	7	5.27302	2.58469	2	1.98347
F8VPD4 (+1)	CAD	67	44	29	0	0	0	0	0	0	5.54432	1.87147	5.54432	1.87147
P11142	HSPA8	38	32	26	0	0	0	15	6	5	5	3.11748	1.88452	2.11385
P60709	ACTB	32	29	21	0	0	0	23	13	14	4.77259	2.94424	0.713696	1.09737
Q9BUF5	TUBB6	52	29	22	0	0	0	8	0	0	5.10154	1.71474	3.6865	1.54511
P46937	YAP1	19	15	15	14	17	19	7	4	4	3.19967	0.0585005	1.70782	2.61208
P11021	HSPA5	39	28	19	1	1	1	17	5	5	4.8413	2.05799	1.67138	1.31009
P15924	DSP	60	24	8	0	0	0	0	0	0	4.9386	0.932304	4.9386	0.932304
P52272	HNRNPM	37	22	13	0	0	0	9	5	3	4.58496	1.57561	2.08246	1.19379
A0A7I2V5Y7 (+1)	NONO	31	20	17	0	0	0	11	6	4	4.5025	2.22323	1.69515	1.52666
P08729	KRT7	33	27	19	0	0	0	8	0	0	4.71882	2.5376	3.30378	2.08714
Q13085	ACACA	55	30	12	0	0	0	0	0	0	5.01495	1.21847	5.01495	1.21847
A0A087WVQ6 (+1)	CLTC	38	25	16	0	0	0	2	0	0	4.71882	1.8366	5.30378	1.7915
A0A7I2V4I6 (+1)	HNRNPA2B1	24	12	5	4	4	5	15	8	8	4.94251	0.773689	0.403356	0.215252
E7EPN9 (+1)	PRRC2C	23	15	8	9	6	9	0	0	0	3.52356	0.758207	3.9386	1.61894
Q96PK6	RBM14	24	19	11	2	1	3	5	3	3	4.75489	1.85567	2.29546	1.69203
O15042	U2SURP	29	24	12	0	0	0	0	0	0	4.43741	1.89644	4.43741	1.89644
Q9NZB2	FAM120A	29	22	16	0	0	0	0	0	0	4.48113	2.39631	4.48113	2.39631
P25705	ATP5F1A	5	2	0	13	14	15	6	7	4	1.80735	2.76346	-1.28011	0.915806
J3QK89 (+1)	CHERP	20	15	14	2	1	1	0	0	0	5.19967	2.8687	4.02975	3.03621
Q15084	PDIA6	16	11	8	0	0	0	8	9	6	3.54432	2.12552	0.605721	0.735008
G8JLB6 (+1)	HNRNPH1	15	11	9	0	0	0	9	5	4	3.54432	2.56719	0.959358	1.14211
Q13263	TRIM28	21	20	14	0	0	0	3	0	0	4.1964	2.95624	4.1964	2.70752
Q9H6S3	EPS8L2	27	18	11	0	0	0	0	0	0	4.22239	1.80352	4.22239	1.80352
P52597	HNRNPF	12	10	10	0	0	0	9	4	3	3.41504	4.05061	1	1.26887
A0A7I2V2R3 (+2)	HNRNPA3	12	10	4	3	2	3	7	3	4	4.2854	1.16265	0.893085	0.675991
Q96I25	RBM17	17	13	10	0	0	0	0	0	0	3.73697	2.55783	3.73697	2.55783
Q8WWM7	ATXN2L	21	14	3	3	3	2	1	0	0	4.83289	0.887764	5.24793	1.10481
Q15637	SF1	14	10	10	3	2	4	3	0	0	4.08746	2.33932	3.5025	2.46319
A0A0D9SF53 (+7)	DDX3X	17	14	9	0	0	0	1	0	0	3.73697	2.33358	5.32193	2.27778
A0A7I2V3R8 (+2)	HNRNPA1	10	6	4	2	3	3	9	6	4	3.90689	1.04684	0.0740006	0.0500818
Q99856	ARID3A	19	11	10	0	0	0	0	0	0	3.73697	2.02521	3.73697	2.02521
Q14444	CAPRIN1	11	9	9	1	0	2	1	0	0	3.85798	3.22113	4.85798	3.63078
P17844	DDX5	20	6	6	0	0	0	3	1	1	3.41504	1.07441	2.67807	0.889862
Q14157	UBAP2L	16	6	7	0	0	0	0	0	0	3.27302	1.41566	3.27302	1.41566
P08238	HSP90AB1	12	9	1	0	0	0	5	3	1	2.87447	1.04946	1.28951	0.551246
Q9UMS4	PRPF19	12	9	4	0	0	0	1	1	1	3.05889	1.63179	3.05889	1.45902
P38159	RBMX	10	6	3	0	0	0	4	1	1	2.66297	1.45095	1.66297	0.893642
P31942	HNRNPH3	10	10	6	0	0	0	5	0	0	3.11548	2.5391	2.37851	1.51554
A0A7I2V5S2 (+2)	NPM1	5	7	2	1	0	1	4	4	2	3.39232	1.25931	0.485427	0.345668
A0A087WVQ9 (+3)	EEF1A1	8	5	4	0	0	0	6	3	3	2.5025	2.03593	0.5025	0.460309
A0A1B0GTW1 (+3)	TJP2	15	6	1	0	0	0	0	0	0	2.87447	0.830052	2.87447	0.830052
B0QYK0 (+1)	EWSR1	4	5	3	2	3	3	3	2	1	3.16993	0.935104	1	1.15191
P84090	ERH	6	4	2	4	3	2	1	0	0	2.58496	0.317118	3.58496	1.42025
A0A0A0MRJ6 (+1)	PCMT1	11	8	5	0	0	0	3	1	0	3	2.0048	2.58496	1.57616
P49750	YLPM1	16	4	3	0	0	0	0	0	0	2.9386	0.852902	2.9386	0.852902
Q15365	PCBP1	10	8	3	0	0	0	2	0	0	2.80735	1.54923	3.39232	1.35428
K7EK33 (+2)	DAZAP1	5	5	1	3	3	4	3	1	0	3.04439	0.0860305	1.45943	0.661201
Q14192	FHL2	5	2	2	3	5	4	1	0	0	2.16993	0.36118	3.16993	1.18925
P31689	DNAJA1	13	8	2	0	0	0	0	0	0	2.9386	1.13388	2.9386	1.13388
Q9Y230	RUVBL2	13	7	1	0	0	0	1	0	0	2.80735	0.945372	4.39232	0.893096
O75533	SF3B1	14	6	1	0	0	0	0	0	0	2.80735	0.859624	2.80735	0.859624
Q9UMX0	UBQLN1	7	3	1	4	2	3	1	0	0	2.45943	0.132181	3.45943	0.863654
Q13501	SQSTM1	9	6	3	1	0	0	2	0	0	3.75489	1.48805	3.16993	1.3439
Q9Y2W1	THRAP3	9	3	1	2	1	2	0	0	0	3.2854	0.476883	2.11548	0.836341
Q15424	SAFB	9	5	2	0	0	0	0	0	0	2.41504	1.23535	2.41504	1.23535
P35579	MYH9	13	4	1	0	0	0	0	1	0	2.58496	0.765928	4.16993	0.715254
A0A0R4J2E8 (+1)	MATR3	11	6	1	0	0	0	0	0	0	2.58496	0.973843	2.58496	0.973843
A0A7P0T893 (+1)	AKAP8	7	5	3	0	0	0	0	0	0	2.32193	1.9084	2.32193	1.9084
Q9NYF8	BCLAF1	5	2	1	1	1	1	0	0	0	1.41504	0.623795	1.41504	1.04223
E9PPJ0 (+1)	SF3B2	7	4	2	0	0	0	1	1	0	2.11548	1.39102	2.70044	1.15667
P13674	P4HA1	11	5	1	0	0	0	0	0	0	2.5025	0.910264	2.5025	0.910264
Q9H0D6	XRN2	13	4	0	0	0	0	0	0	0	2.5025	0.668637	2.5025	0.668637
Q15393	SF3B3	13	4	1	0	0	0	0	0	0	2.58496	0.765928	2.58496	0.765928
A0A8C8MQ70 (+1)	UBAP2	7	7	2	0	1	1	0	0	0	3.58496	1.2873	2.41504	1.48279
A0A7P0TBF0	TNPO1	10	4	3	0	0	0	0	0	0	2.5025	1.21806	2.5025	1.21806
H0YAR2 (+1)	PABPC1	12	4	0	0	0	0	0	0	0	2.41504	0.688022	2.41504	0.688022
O60814 (+13)	H2BC12	2	0	0	1	1	0	1	0	1	0.584963	#VALUE!	0	#VALUE!
O60884	DNAJA2	5	5	3	0	0	0	1	0	0	2.11548	2.5391	3.70044	2.235
Q2Q1W2	TRIM71	10	2	2	0	0	0	0	0	0	2.22239	0.809623	2.22239	0.809623
F8VZX2 (+2)	PCBP2	7	3	2	0	0	0	0	0	0	2	1.23	2	1.23
A0A0U1RR32 (+2)	hCG_2039566	2	0	1	1	1	1	2	1	2	0	#VALUE!	-0.736966	0.427243
A0A0B4J1Z1 (+2)	SRSF7	5	3	3	1	1	2	1	0	0	3.04439	1.45385	3.45943	1.9564
Q14974	KPNB1	6	4	3	0	0	0	0	0	0	2.11548	2.09876	2.11548	2.09876
H3BPE7 (+1)	FUS	3	1	0	0	0	1	1	1	1	1.58496	0.457622	0.415037	0.139866
A0A3B3IRI2 (+1)	CTPS1	8	5	2	0	0	0	0	0	0	2.32193	1.34961	2.32193	1.34961
Q08211	DHX9	7	4	0	0	0	0	0	0	0	1.87447	0.839177	1.87447	0.839177
A0A1B0GTU4 (+1)	PXN	3	2	1	1	2	3	2	0	0	1.58496	#VALUE!	1.58496	0.688022
E9PI39 (+6)	EEF1D	0	0	0	4	4	4	0	0	0	#NUM!	#NUM!	#NUM!	#NUM!
Q9Y265	RUVBL1	6	4	3	0	0	0	0	0	0	2.11548	2.09876	2.11548	2.09876
Q6NZY4	ZCCHC8	7	2	3	0	0	0	0	0	0	2	1.23	2	1.23
P04264	KRT1	3	0	2	0	3	0	0	0	0	0.321928	0.191566	0.736966	0.880157
A0A7I2YQN9 (+1)	G3BP1	9	5	0	0	0	0	0	0	0	2.22239	0.831155	2.22239	0.831155
A0A7I2V2X6 (+3)	HSPD1	5	3	0	0	0	1	3	1	0	2.58496	0.715391	1	0.321827
M0QXL5 (+3)	FBL	6	2	1	0	0	0	1	0	0	1.58496	0.9172	3.16993	0.78707
A0A7P0TAQ9 (+1)	DNAJC10	9	2	1	0	0	0	0	0	0	1.58496	2.18489	1.58496	2.18489
Q6Y7W6	GIGYF2	10	0	0	0	0	0	0	0	0	1.41504	1.79237	0.736966	2.12552
Q15654	TRIP6	2	2	1	0	0	2	0	0	0	0.415037	1.79237	1.41504	1.79237
P17858	PFKL	5	1	1	0	0	0	0	0	0	0.415037	1.79237	0.415037	1.79237
Q14152	EIF3A	6	2	0	1	0	0	0	0	0	#NUM!	1.79237	1	1.58971
P61978	HNRNPK	9	1	0	0	0	0	0	0	0	1	1.58971	1	1.58971
P09496	CLTA	2	1	0	0	0	0	0	0	0	1	1.58971	1	1.58971
Q9Y3I0	RTCB	4	2	0	0	0	0	0	0	0	1	1.58971	1.73697	1.29972
Q8N1F7	NUP93	8	3	0	0	0	0	0	0	0	#NUM!	1.58971	1.58496	1.22062
A0A0U1RQF0 (+1)	FASN	8	1	0	0	0	0	0	0	0	1.73697	1.29972	0.736966	1.17544
Q6KC79	NIPBL	5	4	1	0	0	0	0	0	0	1.58496	1.22062	1.41504	1.04223
Q5JSZ5	PRRC2B	4	0	0	0	0	1	0	0	0	0.736966	1.17544	1.41504	1.04223
A0A6Q8PFY7 (+1)	TFG	3	4	2	0	0	0	0	0	0	1.41504	1.04223	2	0.994854
A0A7I2V351 (+3)	KPNA2	8	2	0	0	0	0	0	0	0	1.41504	1.04223	0.415037	0.935104
A0A087WY71 (+2)	AP2M1	4	2	2	0	0	0	0	0	0	0.415037	0.935104	0.415037	0.935104
C9JRJ5 (+1)	LIMD1	5	1	0	0	1	0	0	0	0	0.415037	0.935104	1.22239	0.905983
A0A024RCR6 (+4)	BAG6	6	1	0	0	0	0	0	0	0	1.22239	0.905983	1.73697	0.880157
Q8WUF5	PPP1R13L	6	4	0	0	0	0	0	0	0	1.73697	0.880157	0.736966	0.880157
Q9Y446	PKP3	6	2	0	0	0	0	0	0	0	0.736966	0.880157	2.32193	0.829304
Q01813	PFKP	4	1	0	0	0	0	0	0	0	1.22239	0.809623	1.22239	0.809623
A0A1B0GTU5 (+2)	ARID1A	9	1	0	0	0	0	0	0	0	1	0.800514	1	0.800514
A0A7P0T8J3 (+6)	P4HB	3	0	0	0	0	0	1	1	0	0	0.800514	0	0.800514
P48634	PRRC2A	5	2	1	0	0	0	0	0	0	0	0.800514	0	0.800514
P11388	TOP2A	7	1	1	0	0	0	0	0	0	0	0.800514	0	0.800514
Q9BTA9	WAC	2	0	1	0	0	0	0	0	0	0	0.800514	0	0.800514
B4DXZ6 (+3)	FXR1	5	3	1	0	0	0	0	0	0	0	0.800514	0	0.800514
Q9Y6Y8	SEC23IP	5	2	1	0	0	0	0	0	0	0	0.800514	0	0.800514
Q07666	KHDRBS1	2	2	0	0	0	0	0	0	0	0	0.800514	0	0.800514
Q8WXF1	PSPC1	2	2	0	0	0	0	0	0	0	0	0.800514	0	0.800514
Q9Y224	RTRAF	6	1	0	0	0	0	0	0	0	0	0.800514	0	0.800514
A0A0C4DFV9 (+1)	SET	3	1	1	1	0	1	1	0	0	0	0.800514	0	0.800514
A0A0G2JM12 (+5)	CSNK2B	3	2	1	0	0	0	0	0	0	2	0.727778	0	0.800514
P62820	RAB1A	3	2	1	0	0	0	0	0	0	1.87447	0.718558	2	0.727778
A0A7P0T840 (+8)	CANX	4	0	0	0	0	0	0	0	0	1.41504	0.688022	1.87447	0.718558
P04406	GAPDH	6	1	0	0	0	0	0	0	0	0.415037	0.688022	1.41504	0.688022
K7ELL7 (+1)	PRKCSH	0	0	0	1	2	3	0	0	0	0.415037	0.688022	1.41504	0.688022
P46940	IQGAP1	3	0	1	0	0	0	0	0	0	0.415037	0.688022	0.415037	0.688022
P42285	MTREX	5	1	0	0	0	0	0	0	0	0.415037	0.688022	0.415037	0.688022
P13807	GYS1	4	3	0	0	0	0	0	0	0	0.415037	0.688022	0.415037	0.688022
P11498	PC	5	1	0	0	0	0	0	0	0	0.415037	0.688022	0.415037	0.688022
A0A7I2V2M3 (+15)	EIF3I	4	1	0	0	0	0	0	0	0	1.58496	0.681937	0.415037	0.688022
P63010	AP2B1	4	1	0	0	0	0	0	0	0	1.73697	0.623795	0.415037	0.688022
A0A7I2V430 (+2)	DDX1	4	0	0	0	0	0	0	0	0	0.736966	0.623795	1.58496	0.681937
Q13247	SRSF6	2	1	0	1	1	0	0	0	0	0.736966	0.623795	1.73697	0.623795
A0A0C4DG44	HTRA2	2	0	0	1	1	2	0	0	0	0.736966	0.623795	0.736966	0.623795
J3KP15 (+2)	SRSF2	2	0	0	0	1	2	0	0	0	0.736966	0.623795	0.736966	0.623795
P84103	SRSF3	3	0	0	0	1	1	0	0	0	0.736966	0.623795	0.736966	0.623795
O43865	AHCYL1	3	2	1	0	0	0	0	0	0	1.90689	0.600646	0.736966	0.623795
A0A0A0MRA5 (+2)	HNRNPUL1	3	1	0	0	0	0	0	0	0	0.906891	0.600646	0.736966	0.623795
Q9C0J8	WDR33	5	0	0	0	0	0	0	0	0	1	0.584067	1	0.584067
P62829	RPL23	2	1	1	0	0	0	1	0	0	1	0.584067	1	0.584067
Q8N3V7	SYNPO	3	1	1	0	0	0	0	0	0	2.58496	0.579231	1	0.584067
A0A7I2V4Y4 (+1)	ACTN1	3	2	0	0	0	0	0	0	0	1.22239	0.557412	1.22239	0.557412
P49792	RANBP2	3	1	0	0	0	0	0	0	0	1.22239	0.557412	1.22239	0.557412
C9JNW5 (+2)	RPL24	4	1	0	0	0	0	0	0	0	1.22239	0.557412	1.22239	0.557412
H3BMH2 (+3)	RAB11A	4	1	0	0	0	0	0	0	0	1.58496	0.524157	1.58496	0.524157
D6R9P3 (+3)	HNRNPAB	0	0	0	1	2	1	0	0	0	1.73697	0.513132	1.73697	0.513132
A0A590UJI2 (+4)	CALM2	2	1	1	0	0	0	0	0	0	1.73697	0.513132	1.73697	0.513132
J3KTL2 (+1)	SRSF1	2	0	0	0	1	0	0	0	0	2.16993	0.460309	1.73697	0.427243
Q13151	HNRNPA0	3	1	0	0	0	0	0	0	0	1.73697	0.427243	0.736966	0.427243
Q7Z417	NUFIP2	3	1	0	0	0	0	0	0	0	0.736966	0.427243	0.415037	0.427243
P31946	YWHAB	2	1	0	0	0	0	0	0	0	0.415037	0.427243	0.415037	0.427243
Q92922	SMARCC1	2	1	0	0	0	0	0	0	0	0.415037	0.427243	0.415037	0.427243
P62136	PPP1CA	3	1	0	0	0	0	0	0	0	0.415037	0.427243	0.415037	0.427243
B2R5W2 (+3)	HNRNPC	2	0	0	0	0	0	0	0	0	0	0.427243	0	0.427243
Q8NFH5	NUP35	3	0	0	0	0	0	0	0	0	0	0.427243	0	0.427243
A0A1X7SBS4 (+2)	TEAD3	2	0	0	0	0	0	0	0	0	0	0.427243	0	0.427243
P20700	LMNB1	3	0	0	0	0	0	0	0	0	0	0.427243	0	0.427243
A0A087X0K9 (+5)	TJP1	3	0	0	0	0	0	0	0	0	0	0.427243	0	0.427243
C9J2Y9 (+1)	POLR2B	4	0	0	0	0	0	0	0	0	0	0.427243	0	0.427243
O15355	PPM1G	3	0	0	0	0	0	0	0	0	0	0.427243	0	0.427243
Q96JB3	HIC2	2	1	0	0	0	0	0	0	0	0	0.427243	0	0.427243
Q3MHD2	LSM12	2	1	0	0	0	0	0	0	0	0	0.427243	0	0.427243
J3KPD3	RBM7	2	1	0	0	0	0	0	0	0	0	0.427243	0	0.427243
B5ME19 (+1)	EIF3CL	2	0	1	0	0	0	0	0	0	0	0.427243	0	0.427243
O00267	SUPT5H	2	1	0	0	0	0	0	0	0	-0.584963	0.427243	-0.584963	0.427243
E7EQG2 (+2)	EIF4A2	2	1	0	0	0	0	0	0	0	-0.584963	0.427243	-0.584963	0.427243
K7ERG4 (+1)	SNRPD2	2	0	0	0	0	0	0	0	0	-0.584963	0.427243	-0.584963	0.427243
A0A2R8Y5T0 (+25)	DYNC1H1	2	0	0	0	0	0	0	0	0	-0.584963	0.427243	-0.584963	0.427243
H0YDN1 (+1)	PLEC	3	0	0	0	0	0	0	0	0	-0.584963	0.427243	-0.584963	0.427243
A0A0B4J203	FIP1L1	3	0	0	0	0	0	0	0	0	-0.584963	0.427243	-0.584963	0.427243
P55884	EIF3B	2	0	0	0	0	0	0	0	0	-0.584963	0.427243	-0.584963	0.427243
H7C0N4	SF1	3	0	0	0	0	0	0	0	0	-0.584963	0.427243	-0.584963	0.427243
Q7RTV0	PHF5A	3	0	0	0	0	0	0	0	0	-0.584963	0.427243	-0.584963	0.427243
F8VQY6 (+6)	RPLP0	3	0	0	0	0	0	0	0	0	-0.584963	0.427243	-0.584963	0.427243
Q9UQ35	SRRM2	3	0	0	0	0	0	0	0	0	-0.584963	0.427243	-0.584963	0.427243
A0A494C128 (+1)	NOP56	2	0	0	0	0	0	0	0	0	-0.584963	0.427243	-0.584963	0.427243
A0A7I2V2D8 (+13)	HGS	2	0	0	0	0	0	0	0	0	-0.584963	0.427243	-0.584963	0.427243
O15230	LAMA5	2	0	0	0	0	0	0	0	0	-0.584963	0.427243	-0.584963	0.427243
P12236	SLC25A6	2	0	0	0	0	0	0	0	0	-0.584963	0.427243	-0.584963	0.427243
Q99459	CDC5L	0	2	0	0	0	0	0	0	0	-0.584963	0.427243	-0.584963	0.427243
Q14676	MDC1	2	0	0	0	0	0	0	0	0	-0.584963	0.427243	-0.584963	0.427243
A0A7I2V2H9 (+9)	EIF3E	2	0	0	0	0	0	0	0	0	-0.584963	0.427243	-0.584963	0.427243
A0A0A0MSW3 (+2)	NUP214	2	0	0	0	0	0	0	0	0	-0.584963	0.427243	-0.584963	0.427243
O75934	BCAS2	2	0	0	0	0	0	0	0	0	-0.584963	0.427243	-0.584963	0.427243
O96019	ACTL6A	2	0	0	0	0	0	0	0	0	-0.584963	0.427243	-0.584963	0.427243
Q13547	HDAC1	2	0	0	0	0	0	0	0	0	0.584963	0.37505	-0.584963	0.427243
Q96KR1	ZFR	2	0	0	0	0	0	0	0	0	1.58496	0.294857	-0.584963	0.427243
Q8IZL8	PELP1	2	0	0	0	0	0	0	0	0	1.16993	0.191566	-0.584963	0.427243
C9J5V9 (+1)	YBX1	2	0	0	0	0	0	0	0	0	0.584963	0.168854	0.584963	0.11484
E9PQ57 (+1)	RAE1	2	0	0	0	0	0	0	0	0	0	0.139866	#NUM!	#NUM!
A0A0D9SF20 (+4)	PTBP1	2	0	0	0	0	0	0	0	0	1.16993	0.11484	#NUM!	#NUM!

## Sheet: ZIKV-MFP
Accession Number	Alternate ID	ZIKV-MFP total spectrum counts			Mock infection total spectrum counts			ZIKV infected total spectrum counts			log2 (FC/Mock)	negative log10 pvalue (FC/Mock)	log2 (FC/ZIKV)	negative log10 pvalue (FC/ZIKV)
P05787	KRT8	145	143	152	104	115	118	138	140	140	0.384755	2.61013	0.0740006	1.22648
P38646	HSPA9	160	171	166	39	56	52	160	159	171	1.75743	4.37675	0.0204641	0.17761
P10809	HSPD1	148	143	143	27	26	29	137	131	146	2.404	6	0.0680643	0.645267
P23246	SFPQ	126	114	109	45	54	56	124	109	113	1.17096	3.35556	0.012455	0.0509097
P08727	KRT19	93	101	114	70	88	76	103	93	103	0.396422	1.41952	0.0427849	0.161784
ASK51714.1	ZIKV NS5	161	172	168	0	0	0	102	90	94	7.3837	6	0.808795	3.9393
Q09666	AHNAK	75	72	81	155	121	115	42	62	57	-0.778135	1.88683	0.501973	1.56476
P11021	HSPA5	112	112	112	41	42	35	101	106	105	1.50967	5.30103	0.106915	2.19709
P35579	MYH9	119	133	126	16	13	11	94	87	94	3.24031	4.88606	0.458955	2.74041
P68104	EEF1A1	121	124	118	10	11	12	116	121	107	3.45943	6	0.077561	0.642977
P07437	TUBB	120	123	131	16	19	17	91	101	100	2.84645	5.22185	0.35707	2.40572
P68371	TUBB4B	121	122	132	14	16	15	95	100	98	3.05889	5.1549	0.35599	2.70312
P05783	KRT18	90	104	101	31	37	39	74	81	80	1.4631	3.67162	0.328054	1.85655
P25705	ATP5F1A	88	77	86	8	11	11	131	110	116	3.06465	4.50864	-0.508237	2.11776
Q15233	NONO	84	85	83	31	31	34	105	83	67	1.39232	6	-0.0170735	0.0305277
P08238	HSP90AB1	109	111	101	8	13	13	82	93	85	3.23897	5	0.304062	1.97699
P14625	HSP90B1	85	93	91	9	16	16	81	81	95	2.71391	4.65758	0.0658378	0.311123
O75369	FLNB	106	105	103	20	20	19	90	82	82	2.41198	6	0.305936	2.68698
P49327	FASN	124	123	122	0	1	0	57	76	78	8.52748	6	0.806378	2.84497
tr|I3L4N8|I3L4N8_HUMAN	ACTG1	71	68	68	18	19	18	99	95	103	1.91213	6	-0.520832	3.54668
P04350	TUBB4A	101	0	107	0	0	0	0	82	81	6.11548	0.933872	0.351712	0.124506
Q92945 (+1)	KHSRP	54	54	51	69	68	70	47	53	46	-0.380604	3.8041	0.123058	0.836341
P07900	HSP90AA1	95	91	89	3	9	7	68	71	66	3.85536	5.39794	0.423808	3.28567
P68363	TUBA1B	85	84	84	16	15	18	76	75	81	2.36828	6	0.125013	1.68588
tr|Q60FE5|Q60FE5_HUMAN	FLNA	66	73	74	40	36	38	57	57	61	0.90182	3.54668	0.283499	1.94815
Q96I24	FUBP3	72	68	64	26	22	36	68	60	55	1.28011	2.9594	0.156726	0.722157
P20700	LMNB1	63	61	61	27	20	22	76	67	59	1.42286	4.22185	-0.12683	0.499488
Q9BQE3	TUBA1C	79	74	76	14	0	0	68	67	74	4.03185	3.89963	0.131845	1.19395
P11142	HSPA8	71	61	72	22	24	15	56	54	62	1.74169	3.36754	0.246161	1.17843
P52272	HNRNPM	77	73	79	8	6	9	53	56	58	3.31564	5.39794	0.455499	3.08197
P12270	TPR	44	50	48	48	51	53	38	41	44	-0.0981804	0.660712	0.207233	1.20406
Q07954	LRP1	58	55	52	24	33	38	37	47	52	0.796467	2.1999	0.278859	0.955112
P11940	PABPC1	70	65	72	2	1	2	74	63	73	5.37156	5.22185	-0.0207586	0.0869553
Q9NYU2	UGGT1	66	64	65	0	0	0	60	69	74	6.02237	6	-0.0580056	0.256288
P08729	KRT7	48	50	45	36	35	33	45	40	41	0.459432	2.8041	0.182591	1.26142
P68133	ACTA1	42	44	42	0	0	0	62	62	60	5.41504	6	-0.523562	4.42022
Q9UMS4	PRPF19	52	53	56	13	12	11	57	56	51	2.16099	5.22185	-0.0266351	0.171006
P07237 (+1)	P4HB	31	34	34	26	32	34	40	40	38	0.105795	0.375947	-0.253286	2.20663
tr|A0A6Q8PFJ0|A0A6Q8PFJ0_HUMAN	LMNA	45	47	50	16	13	13	54	48	54	1.75743	4.33724	-0.135655	0.879123
Q13435	SF3B2	49	30	35	19	25	28	33	30	32	0.662965	1.04874	0.263034	0.47777
P46937	YAP1	36	29	25	36	48	47	29	30	27	-0.54157	1.2791	0.0655883	0.148988
P22626	HNRNPA2B1	42	43	43	12	12	10	39	42	51	1.91254	5.69897	-0.0443941	0.135868
P61978	HNRNPK	45	44	44	11	8	11	41	45	43	2.14839	5.30103	0.0440552	0.482197
P31943 (+1)	HNRNPH1	49	49	48	3	2	4	35	39	42	4.0199	6	0.331844	2.08407
P15924	DSP	51	49	51	0	0	0	35	34	39	5.65344	6	0.483517	2.99783
Q15637	SF1	31	35	31	30	34	25	39	31	26	0.124179	0.383515	0.0149503	0.0278875
Q00610 (+1)	CLTC	62	60	62	1	5	4	22	29	28	4.20163	5.69897	1.21978	3.97469
Q8WXF1	PSPC1	34	32	26	22	19	18	35	30	31	0.640919	1.82574	-0.0614005	0.177807
Q96AE4	FUBP1	23	20	19	33	34	28	30	27	26	-0.615659	2.11776	-0.420843	1.83473
O43707	ACTN4	39	42	48	6	7	7	35	44	44	2.6893	3.77469	0.0687128	0.191566
Q15084	PDIA6	44	42	41	5	6	4	42	37	40	3.08179	5.39794	0.0938669	0.717278
P35556	FBN2	19	19	19	49	50	49	18	18	12	-1.37656	6	0.247928	0.681937
P52597	HNRNPF	41	46	43	3	2	3	35	33	41	4.02237	4.95861	0.254183	1.17184
Q15149	PLEC	48	47	51	10	5	3	21	31	38	3.0199	4.22915	0.697971	1.67227
Q08211	DHX9	46	46	49	1	1	0	32	36	41	6.13955	5.69897	0.371367	1.72811
P11498	PC	53	43	49	0	0	0	38	42	45	5.59495	4.11351	0.214125	0.875956
Q9Y490	TLN1	56	49	51	1	6	3	27	30	24	3.96347	4.35655	0.945552	3.11634
tr|E7EPN9|E7EPN9_HUMAN	PRRC2C	24	29	24	31	39	36	20	20	24	-0.461134	1.55264	0.266787	0.950085
tr|A0A7I2V5S2|A0A7I2V5S2_HUMAN	NPM1	24	19	13	38	37	36	20	18	20	-0.987061	2.32203	-0.0506261	0.0718921
Q9BUF5	TUBB6	53	45	51	0	0	0	24	35	35	5.63421	4.49485	0.66458	1.85695
tr|B1ANR0|B1ANR0_HUMAN	PABPC4	35	42	48	0	0	0	38	32	39	5.38082	3.42481	0.1976	0.542036
tr|A0A804HII9|A0A804HII9_HUMAN (+1)	ACTN1	39	42	44	2	4	5	33	37	41	3.50635	4.61979	0.171368	0.789494
P11586 (+2)	MTHFD1	41	38	35	0	0	0	40	40	40	5.24793	4.58503	-0.0740006	0.50515
P49790	NUP153	25	22	23	27	45	31	25	22	19	-0.557218	0.930132	0.0848889	0.275387
P49750	YLPM1	32	35	26	10	17	17	23	32	26	1.07973	2.00846	0.199309	0.46184
Q9UMX0	UBQLN1	31	22	25	23	38	35	19	23	24	-0.29956	0.494595	0.241008	0.584067
P17844	DDX5	44	39	43	0	0	0	37	29	30	5.39232	5	0.392317	1.56293
P49023	PXN	22	24	27	28	32	34	23	20	25	-0.364764	1.42548	0.102362	0.3346
Q14980	NUMA1	24	20	19	38	32	33	14	22	24	-0.709221	2.28676	0.0703893	0.105542
Q8WWM7	ATXN2L	33	28	30	17	26	22	21	19	21	0.485427	1.35839	0.577057	2.47743
P09651 (+2)	HNRNPA1	29	35	30	7	9	6	35	36	31	2.09516	3.51286	-0.117836	0.482197
tr|B0QYK0|B0QYK0_HUMAN	EWSR1	15	15	13	38	44	49	13	20	18	-1.60716	3.07883	-0.246161	0.538386
P02769	ALB	32	26	31	12	13	18	27	27	27	1.04947	2.36845	0.135883	0.649516
tr|A0A7P0TB65|A0A7P0TB65_HUMAN	CANX	33	35	35	5	9	4	23	25	34	2.51658	4.1549	0.328949	0.95003
P54886	ALDH18A1	38	34	38	0	0	0	37	34	34	5.1964	5	0.0671142	0.427243
P04406	GAPDH	35	37	34	5	7	11	29	29	29	2.20436	3.82391	0.284977	2.70093
Q13263	TRIM28	41	37	32	4	3	7	22	32	26	2.974	3.43533	0.459432	1.20457
P14618	PKM	30	32	27	0	2	0	36	35	35	5.47573	4.26761	-0.252187	1.71938
O14497	ARID1A	19	19	20	18	37	31	21	18	22	-0.568284	0.764598	-0.0727563	0.330121
P17812	CTPS1	41	39	44	0	0	0	22	29	25	5.36923	5.04576	0.706269	2.5177
tr|K7ELL7|K7ELL7_HUMAN	PRKCSH	7	7	7	40	46	45	14	8	9	-2.64111	4.40894	-0.561879	0.832943
P30101	PDIA3	21	24	28	10	14	12	30	26	23	1.0199	2.21141	-0.113956	0.28074
Q8IWX8	CHERP	28	31	35	6	7	5	24	19	21	2.38466	3.56067	0.554589	1.79558
Q06830	PRDX1	26	25	26	8	12	14	28	22	29	1.17932	2.87517	-0.0369942	0.108992
tr|A0A7I2V4J9|A0A7I2V4J9_HUMAN	LAMB1	22	23	24	6	10	13	28	28	20	1.25054	2.49512	-0.139403	0.355909
Q14697	GANAB	24	28	29	0	0	1	25	38	36	6.33985	4.16115	-0.289507	0.624812
Q8N3V7	SYNPO	22	19	18	19	19	23	19	21	20	-0.0480943	0.137164	-0.0242475	0.0888946
Q99856	ARID3A	34	26	27	10	13	14	13	18	18	1.23349	2.4045	0.828234	1.86214
Q96PK6	RBM14	21	26	28	14	14	13	23	24	20	0.871267	2.2377	0.16273	0.482197
P0DMV9 (+1)	HSPA1B	29	22	26	0	12	0	19	21	24	2.68182	2.07299	0.266787	0.803125
P08559	PDHA1	20	21	18	0	0	0	32	31	34	4.29768	4.61979	-0.71727	3.27654
P05023	ATP1A1	33	27	31	1	4	3	21	24	25	3.50779	3.82391	0.378512	1.51554
Q13573	SNW1	15	15	16	20	17	19	24	17	21	-0.283793	1.6178	-0.430634	1.21946
P06576	ATP5F1B	28	27	23	0	2	1	31	28	37	4.70044	3.97469	-0.29956	0.9172
Q9C0J8	WDR33	10	10	11	30	35	36	9	15	14	-1.70402	3.61083	-0.293731	0.547292
P46940	IQGAP1	33	30	40	0	1	0	9	19	26	6.6865	3.47237	0.931613	1.32847
Q14192	FHL2	16	11	12	15	26	26	16	20	19	-0.780687	1.10491	-0.495957	1.28656
P42704 (+1)	LRPPRC	36	38	34	0	0	0	13	16	22	5.16993	5.22185	1.08246	2.55925
P26599	PTBP1	27	28	31	2	1	2	25	23	27	4.10434	4.56864	0.197446	1.03314
tr|A0A5H1ZRQ2|A0A5H1ZRQ2_HUMAN	DDX17	28	33	27	0	1	0	29	26	27	6.45943	3.98297	0.10188	0.41397
Q9Y230	RUVBL2	29	26	29	0	0	0	31	25	30	4.80735	5	-0.0339473	0.11484
Q7KZF4	SND1	24	28	27	0	0	0	19	30	26	4.71882	4.58503	0.0749621	0.144222
tr|A0A2R8Y4A4|A0A2R8Y4A4_HUMAN (+1)	DDX3X	25	28	30	0	0	0	19	22	20	4.79008	4.34679	0.444302	1.90306
P35221	CTNNA1	25	26	25	1	5	3	20	26	26	3.078	4.3098	0.0780025	0.262239
Q96EP5 (+2)	DAZAP1	24	23	28	3	4	4	27	30	30	2.76939	3.77728	-0.214125	1.02873
P49792	RANBP2	18	16	24	5	12	7	15	25	20	1.27302	1.62897	-0.0489096	0.0615989
Q03252	LMNB2	23	24	18	7	5	6	17	23	19	1.85244	2.89042	0.139725	0.320236
P98082	DAB2	22	19	16	13	13	14	16	16	17	0.510962	1.48805	0.21818	0.688022
Q15654	TRIP6	14	15	13	19	16	10	22	16	16	-0.0995357	0.136297	-0.36257	0.896039
Q9Y265	RUVBL1	29	29	27	1	1	2	25	23	22	4.40939	5.52288	0.280108	1.97318
P51991 (+1)	HNRNPA3	21	22	19	2	4	4	21	21	23	2.63227	4.01323	-0.0681715	0.380004
P27797 (+1)	CALR	16	16	16	8	8	6	25	21	23	1.12553	3.69465	-0.523562	2.42736
P08195 (+3)	SLC3A2	25	21	18	9	11	8	21	18	22	1.19265	2.25259	0.0692627	0.159143
P06733	ENO1	24	22	28	2	2	1	20	24	23	3.88753	3.66959	0.143364	0.474021
P60842	EIF4A1	29	23	25	0	0	0	15	24	25	4.68182	3.88606	0.266787	0.523969
tr|A0A6Q8KRG2|A0A6Q8KRG2_HUMAN	GOLGA2	9	10	11	23	29	28	9	10	9	-1.41504	2.99311	0.0995357	0.427243
tr|G3V1L9|G3V1L9_HUMAN	TJP1	14	13	14	18	25	18	16	13	11	-0.573185	1.32403	0.0356239	0.0788241
P62805	HIST1H4A	15	17	12	21	17	20	14	21	16	-0.398549	1.16376	-0.212994	0.387183
P08621	SNRNP70	26	21	24	1	1	0	19	22	21	5.14975	3.98716	0.195551	0.817252
Q12931	TRAP1	24	25	26	0	0	0	16	18	18	4.64386	5.69897	0.528379	3.01592
P02751	FN1	11	11	14	7	17	19	18	22	24	-0.25634	0.239101	-0.830075	1.9997
O75934	BCAS2	26	23	21	1	2	1	23	29	20	4.12928	3.91009	-0.040642	0.0777859
Q9NRR5	UBQLN4	14	12	12	19	27	22	9	11	12	-0.839535	1.83556	0.247928	0.839519
P35637	FUS	14	12	13	24	18	19	14	13	15	-0.645335	1.70876	-0.106915	0.540813
P40227	CCT6A	21	21	21	0	0	0	21	16	15	4.39232	#NUM!	0.27684	0.923021
P33240	CSTF2	13	14	15	9	14	13	15	16	14	0.222392	0.540813	-0.0995357	0.540813
Q9H0L4	CSTF2T	13	16	19	6	8	7	19	18	19	1.19265	2.10369	-0.222392	0.688022
Q9Y4L1 (+2)	HYOU1	20	20	18	0	0	0	24	28	26	4.27302	5.09691	-0.427421	2.12552
Q00839	HNRNPU	21	19	24	2	6	4	17	16	14	2.41504	3.13549	0.445411	1.53763
P63010	AP2B1	22	22	26	0	0	0	15	17	19	4.54432	4.20066	0.456858	1.63926
Q6YN16	HSDL2	19	23	26	0	0	0	17	17	22	4.5025	3.43771	0.280108	0.694249
O15230	LAMA5	22	23	28	2	4	4	15	15	20	2.8679	3.35655	0.545968	1.42985
O43464	HTRA2	9	10	11	18	20	21	11	12	14	-0.975752	3.10513	-0.302563	1.03972
P35580	MYH10	21	22	28	2	0	2	15	16	18	4.14975	3.21183	0.535037	1.44578
P49368	CCT3	21	23	25	0	0	0	18	22	23	4.52356	4.4318	0.131245	0.449488
Q9H307	PNN	14	12	13	13	20	21	11	14	15	-0.469485	0.903507	-0.0365259	0.0888946
O43175 (+1)	PHGDH	26	23	24	0	0	1	16	21	17	6.18982	4.85387	0.434937	1.63926
P30876 (+1)	POLR2B	21	20	26	0	0	0	20	20	21	4.48113	3.56384	0.135352	0.457622
P13010	XRCC5	25	20	22	0	1	0	9	19	17	6.06609	3.91009	0.574236	1.01748
P11047	LAMC1	15	16	14	7	11	10	14	19	18	0.684498	1.88081	-0.180572	0.540813
P00761	Trypsin	9	11	11	21	16	18	14	15	12	-0.827163	2.12685	-0.403356	1.40503
O60885	BRD4	16	13	16	12	13	12	12	13	12	0.2824	1.18925	0.2824	1.18925
tr|U3KQK0|U3KQK0_HUMAN	H2BC15	14	15	13	11	12	6	10	10	13	0.534336	1.04739	0.347923	1.22062
Q14444	CAPRIN1	16	18	15	5	8	9	16	13	17	1.15528	2.42079	0.0911479	0.268347
Q9BV38	WDR18	22	20	19	1	1	2	23	20	24	3.93074	4.4437	-0.135352	0.600646
P17987	TCP1	17	22	24	0	0	0	21	21	19	4.39232	3.2652	0.0465426	0.110373
P27708 (+1)	CAD	30	24	28	0	0	0	8	12	16	4.77259	3.99568	1.18763	2.20866
P12268 (+1)	IMPDH2	21	22	18	0	0	0	22	17	24	4.34577	4.14267	-0.0465426	0.0994936
Q9UDY2	TJP2	23	22	21	0	1	2	10	14	18	4.45943	4.85387	0.652077	1.54841
P12956	XRCC6	21	23	18	0	0	0	19	23	21	4.36923	3.84771	-0.0230836	0.0623848
Q9BXP5	SRRT	17	19	18	0	0	0	12	21	18	4.16993	5.22185	0.0824622	0.136297
P07814	EPRS	33	33	27	0	0	0	7	10	8	4.9542	3.99568	1.8953	3.31158
P04264	KRT1	24	14	10	10	19	17	8	12	13	0.0614005	0.0457932	0.540568	0.49134
tr|F8W726|F8W726_HUMAN	UBAP2L	21	14	14	10	9	11	6	10	13	0.707819	1.23737	0.756729	1.0121
tr|M0R165|M0R165_HUMAN	EPS15L1	18	16	18	11	10	12	10	16	14	0.656046	2.70093	0.378512	0.994854
P48643	CCT5	18	19	17	0	0	0	18	16	19	4.16993	5.22185	0.026967	0.11484
P55795	HNRNPH2	20	20	17	0	0	0	11	12	11	4.24793	4.34679	0.745427	2.7217
P19338 (+1)	NCL	16	14	14	16	14	12	5	11	11	0.0671142	0.191566	0.704544	1.26142
P51659 (+2)	HSD17B4	26	16	23	0	0	0	13	14	13	4.43741	2.73049	0.70044	1.3093
P78371	CCT2	19	23	17	0	0	0	19	16	17	4.29768	3.43415	0.182203	0.519645
O75400	PRPF40A	13	15	17	6	5	5	13	15	13	1.49185	2.88706	0.134301	0.427243
Q9H0D6	XRN2	22	19	20	0	0	0	16	15	16	4.34577	4.67778	0.376148	2.10997
Q9Y446	PKP3	21	19	26	0	0	0	15	13	15	4.45943	3.34294	0.618129	1.60681
P31689	DNAJA1	20	19	17	0	0	0	14	17	15	4.22239	4.5376	0.283793	1.2545
tr|A0A669KB05|A0A669KB05_HUMAN	CTNND1	22	20	23	2	2	2	11	12	17	3.43741	4.61979	0.70044	1.81234
P23229 (+1)	ITGA6	15	15	14	10	14	16	9	11	15	0.137504	0.302015	0.330149	0.769577
P50990	CCT8	19	18	21	0	0	0	21	19	18	4.27302	4.58503	0	#VALUE!
Q99459	CDC5L	14	19	14	3	5	3	14	10	12	2.09516	2.58436	0.384664	0.839177
tr|B2R5W2|B2R5W2_HUMAN (+1)	HNRNPC	23	20	22	0	0	0	14	14	12	4.43741	4.79588	0.70044	2.78015
P05165	PCCA	16	20	17	0	0	0	14	18	16	4.14296	3.90309	0.142958	0.427243
tr|A0A7P0TAQ9|A0A7P0TAQ9_HUMAN	DNAJC10	16	18	19	0	0	0	17	14	18	4.14296	4.4318	0.113211	0.37505
O00468	AGRN	13	15	11	7	11	8	10	12	14	0.584963	1.2215	0.115477	0.241548
Q16658	FSCN1	19	19	25	0	0	0	18	19	19	4.39232	3.33255	0.169925	0.503166
P34897	SHMT2	17	19	12	0	0	0	22	18	20	4	2.8122	-0.321928	0.774202
P78406	RAE1	16	17	15	0	0	0	21	15	19	4	5	-0.196397	0.557412
tr|A0A590UJS4|A0A590UJS4_HUMAN	NIPBL	10	8	12	12	15	21	8	9	11	-0.678072	0.973843	0.0995357	0.173809
P31942	HNRNPH3	18	20	20	1	1	1	14	19	18	4.27302	5	0.185556	0.630597
Q13838	DDX39B	16	16	16	1	4	3	13	17	14	2.58496	3.95078	0.125531	0.482197
P14866	HNRNPL	16	17	18	0	0	1	15	16	19	5.67243	4.82391	0.0285692	0.0888946
Q14152	EIF3A	6	7	8	19	18	22	4	4	4	-1.49033	3.16431	0.807355	2.18489
O00151	PDLIM1	9	9	8	23	13	20	9	12	10	-1.10692	1.54577	-0.253757	0.818628
P25205	MCM3	14	17	19	0	0	0	17	18	21	4.05889	3.48149	-0.163499	0.457622
P37198	NUP62	14	11	7	8	14	13	6	12	18	-0.129283	0.134057	-0.169925	0.121231
tr|D6RD18|D6RD18_HUMAN	HNRNPAB	8	10	7	18	16	13	8	9	7	-0.910733	1.90306	0.0588937	0.11484
P55072 (+1)	VCP	16	20	17	0	0	0	14	15	21	4.14296	3.90309	0.0840643	0.149359
P54727	RAD23B	8	7	10	16	13	13	9	10	7	-0.748461	1.88081	-0.0565835	0.0955647
Q15365	PCBP1	12	12	16	8	5	4	14	14	12	1.23447	1.88807	0	#VALUE!
Q9UHD9	UBQLN2	13	13	9	13	19	13	9	9	8	-0.36257	0.623795	0.428843	1.02482
O60884	DNAJA2	20	21	19	0	0	0	12	15	16	4.32193	5.39794	0.480626	1.88081
P49419 (+1)	ALDH7A1	14	16	14	0	0	0	22	16	20	3.87447	4.60206	-0.398549	1.16376
P35908	KRT2	17	0	0	0	0	13	0	0	0	0.387023	0.0650826	2.5025	0.427243
Q6FI13	HIST2H2AA3	12	11	12	15	10	9	12	7	11	0.0418202	0.0613432	0.222392	0.460309
tr|A0A8C8MQ70|A0A8C8MQ70_HUMAN	UBAP2	17	16	14	4	10	7	10	10	11	1.16227	1.95199	0.600393	2.31758
Q9H6S3	EPS8L2	26	26	22	2	1	2	4	5	6	3.88753	4.12494	2.30256	3.76447
O00148	DDX39A	16	11	14	1	3	2	14	16	14	2.77259	2.76346	-0.10188	0.247542
Q14676	MDC1	6	3	7	22	27	21	6	4	7	-2.12928	2.90693	-0.0874628	0.0788241
tr|A8MXP9|A8MXP9_HUMAN	MATR3	19	16	16	0	2	1	8	14	11	4.08746	3.8041	0.628031	1.39857
Q13200	PSMD2	20	19	20	0	0	0	10	15	17	4.29768	6	0.490326	1.26142
Q99832	CCT7	16	13	22	0	0	0	10	13	14	4.08746	2.52057	0.462972	0.736205
Q6Y7W6	GIGYF2	15	16	11	0	2	2	12	11	12	3.39232	2.79371	0.263034	0.678039
Q01813	PFKP	19	17	18	0	0	0	8	16	16	4.16993	5.22185	0.432959	0.789494
Q92922	SMARCC1	18	14	16	7	2	4	10	9	11	1.88452	2.48532	0.678072	2.01417
O43143	DHX15	16	17	18	0	0	0	15	17	17	4.08746	5.09691	0.0577155	0.308241
P13639	EEF2	18	21	21	0	0	0	4	14	10	4.32193	4.4318	1.09954	1.59239
Q9UHB6	LIMA1	7	4	6	9	19	13	9	7	5	-1.27009	1.23716	-0.304855	0.386454
tr|A0A1B0GVI3|A0A1B0GVI3_HUMAN	KRT10	28	8	4	0	7	12	5	8	11	1.074	0.355222	0.736966	0.281742
Q14974	KPNB1	20	20	20	0	0	0	14	9	15	4.32193	#NUM!	0.658963	1.77472
Q10567	AP1B1	16	16	21	0	0	0	9	9	17	4.14296	3.34872	0.598637	0.889262
P62937	PPIA	8	10	9	9	8	10	7	7	6	0	0	0.432959	1.60387
Q14677	CLINT1	9	9	9	12	17	10	7	6	8	-0.530515	0.896039	0.36257	1.58971
P43686	PSMC4	16	19	18	0	0	0	10	17	14	4.14296	4.4318	0.370368	0.839519
O94925	GLS	11	19	19	0	0	0	11	15	14	4.02975	2.44382	0.292782	0.440055
P04075 (+1)	ALDOA	13	17	21	0	0	0	16	15	15	4.08746	2.74136	0.148863	0.288599
Q92879	CELF1	10	17	17	0	0	0	20	13	12	3.87447	2.48519	-0.0324215	0.0327816
O75643	SNRNP200	22	21	21	0	0	0	6	12	14	4.41504	6	1	1.93063
P69849 (+2)	NOMO3	13	18	17	0	0	0	11	16	15	4	3.3279	0.192645	0.39047
Q6UB35 (+1)	MTHFD1L	12	12	12	0	0	0	13	23	20	3.58496	#NUM!	-0.63743	1.05736
P48634	PRRC2A	6	7	5	5	12	12	10	8	10	-0.688056	0.69498	-0.63743	1.71126
Q15393	SF3B3	15	21	17	0	0	0	10	11	8	4.14296	3.25259	0.869939	1.81276
P33992	MCM5	14	12	14	0	0	0	15	16	14	3.73697	4.4318	-0.169925	0.880157
Q14566	MCM6	10	9	15	0	0	0	9	14	16	3.5025	2.4389	-0.197939	0.234864
Q07666	KHDRBS1	12	15	15	1	1	0	7	11	9	4.39232	3.64782	0.63743	1.51293
P31040	SDHA	10	12	12	0	0	0	17	14	19	3.5025	4.1549	-0.556393	1.53855
O75947	ATP5PD	5	8	8	10	9	12	9	10	12	-0.561879	1.17544	-0.561879	1.17544
Q13151	HNRNPA0	11	15	15	0	2	0	10	16	17	4.35755	3.02136	-0.0687128	0.0928967
Q7Z4W1	DCXR	19	14	15	0	0	0	14	16	17	4	3.3279	0.0303736	0.0658511
Q9P2J5 (+3)	LARS	24	18	19	0	0	0	4	13	10	4.34577	3.4045	1.17585	1.60655
Q92499 (+3)	DDX1	17	12	13	0	0	0	12	14	15	3.80735	3.10403	0.0347654	0.0658511
tr|B3KS98|B3KS98_HUMAN	EIF3H	16	17	19	0	0	0	10	10	14	4.11548	4.39794	0.612977	1.70134
P23396	RPS3	13	10	11	0	0	0	17	19	16	3.5025	3.67572	-0.612977	2.06646
Q15427	SF3B4	12	11	11	3	6	4	11	13	14	1.38702	2.75523	-0.160465	0.637895
P07355	ANXA2	15	13	17	0	0	0	8	16	10	3.90689	3.6925	0.40439	0.617763
Q13561	DCTN2	8	10	9	8	11	9	9	7	10	-0.0524674	0.11484	0.0544478	0.11484
O95782	AP2A1	14	15	19	0	0	0	7	19	14	4	3.3279	0.263034	0.282682
O95817	BAG3	14	14	15	5	4	5	7	9	9	1.61891	4.48149	0.782409	2.8884
P61604	HSPE1	9	8	7	8	3	2	10	7	6	0.884523	0.878486	0.0614005	0.0888946
tr|A0A087WUZ3|A0A087WUZ3_HUMAN	SPTBN1	10	12	11	4	5	5	8	12	8	1.23704	3.16431	0.237039	0.501282
P35658 (+1)	NUP214	14	16	16	6	5	7	4	7	6	1.35364	3.34582	1.4361	3.02549
P51114	FXR1	14	19	15	0	0	0	7	9	12	4	3.3279	0.777608	1.46713
O75533	SF3B1	16	16	15	4	5	8	3	9	6	1.46713	2.88174	1.38466	2.26785
tr|A0A7P0T8N8|A0A7P0T8N8_HUMAN	TCERG1	14	12	10	2	3	1	8	10	10	2.58496	2.82507	0.36257	0.935104
Q9P2E9	RRBP1	5	5	10	18	12	16	1	7	3	-1.20163	1.63177	0.862496	0.546685
Q15046	KARS	12	12	14	0	0	0	10	17	13	3.66297	4.34679	-0.0740006	0.113294
Q15459	SF3A1	9	11	15	1	1	1	11	9	11	3.54432	2.42343	0.175087	0.285235
tr|A0A087WY71|A0A087WY71_HUMAN	AP2M1	11	11	12	0	0	0	11	10	8	3.5025	5.39794	0.229482	0.818628
Q15366	PCBP2	14	11	15	0	0	0	10	12	10	3.73697	3.42481	0.321928	0.9054
P09496	CLTA	4	7	7	6	9	9	8	7	6	-0.415037	0.637895	-0.222392	0.36118
Q9NW64	RBM22	11	11	9	2	2	2	11	14	13	2.36923	3.62709	-0.293731	0.989598
Q04637	EIF4G1	12	11	13	6	6	8	6	7	4	0.847997	2.42343	1.08246	2.41308
P21796	VDAC1	8	12	16	2	2	1	9	12	13	2.848	1.94176	0.0824622	0.0912341
P49756	RBM25	15	12	13	0	1	1	9	7	10	4.32193	3.74958	0.621488	1.69698
P05141	SLC25A5	14	12	15	0	0	0	14	9	16	3.77259	3.99568	0.0721498	0.106375
P11177	PDHB	9	17	17	0	0	0	10	12	12	3.8413	2.23747	0.338802	0.47311
Q01518	CAP1	13	13	16	0	0	0	5	9	10	3.80735	3.82102	0.807355	1.51827
P33993	MCM7	12	14	15	0	0	0	10	9	11	3.77259	3.99568	0.450661	1.59541
Q14683	SMC1A	17	12	19	0	0	0	9	6	10	4	2.8122	0.941106	1.47846
Q9UQE7	SMC3	12	12	15	0	0	0	7	7	11	3.70044	3.69465	0.641546	1.31147
tr|E9PDR0|E9PDR0_HUMAN	PCCB	12	13	16	0	0	0	10	10	13	3.77259	3.46725	0.313158	0.78707
Q14103	HNRNPD	8	8	8	8	6	5	11	10	12	0.337035	0.880157	-0.459432	2.18489
Q6P2Q9	PRPF8	14	13	19	0	0	0	6	8	11	3.9386	2.93144	0.879706	1.38563
P50991	CCT4	14	13	10	0	0	0	10	12	9	3.62449	3.29414	0.255257	0.600646
P08648	ITGA5	9	7	7	9	11	11	8	8	9	-0.430634	1.32403	-0.120294	0.37505
Q15029	EFTUD2	11	11	14	0	0	0	9	10	11	3.58496	3.55909	0.263034	0.800514
O15371	EIF3D	11	14	13	0	0	0	9	10	10	3.66297	3.86328	0.389947	1.47532
P47897	QARS	16	17	14	0	0	0	4	11	12	3.96963	4.22915	0.799701	1.17544
Q9UBU9	NXF1	14	16	14	0	0	0	8	12	13	3.87447	4.60206	0.415037	1.03314
P30153	PPP2R1A	14	14	15	0	0	0	11	10	12	3.8413	5.69897	0.381871	2.12552
Q9Y3I0	RTCB	11	12	9	0	0	0	11	13	11	3.41504	3.57187	-0.129283	0.380004
Q13501	SQSTM1	9	9	13	3	5	5	12	9	6	1.25376	1.80134	0.199309	0.240469
P62316	SNRPD2	9	7	9	5	5	3	12	6	7	0.943416	1.87824	0	#VALUE!
Q15437 (+1)	SEC23B	18	15	15	0	0	0	8	8	9	4	4.05061	0.941106	2.7217
Q86UP2	KTN1	5	4	6	11	10	10	6	4	7	-1.04731	2.87811	-0.180572	0.250698
P52948	NUP98	9	10	12	4	2	5	9	9	8	1.49476	2.22878	0.253757	0.818628
P62195	PSMC5	15	16	13	0	0	0	10	9	8	3.87447	4.11351	0.704544	2.2377
Q15019	SEPTIN2	12	13	13	0	0	0	12	9	9	3.66297	5.52288	0.341037	1.18925
Q15067	ACOX1	9	10	8	0	0	0	12	13	15	3.16993	4.00436	-0.567041	1.83206
Q9H6R4	NOL6	12	14	14	0	0	0	6	8	7	3.73697	4.4318	0.929611	2.70093
Q9BRK5 (+1)	SDF4	5	6	6	8	11	8	3	7	6	-0.667425	1.46713	0.0874628	0.0955647
Q13283	G3BP1	10	10	13	3	3	0	10	11	9	2.45943	2.50501	0.137504	0.36118
P16144	ITGB4	14	13	9	0	0	0	10	7	12	3.58496	2.84802	0.311944	0.480881
Q99829	CPNE1	11	12	9	0	0	0	6	10	10	3.41504	3.57187	0.29956	0.554267
P53992	SEC24C	13	12	18	0	0	2	5	6	7	4.42626	2.64283	1.25634	1.89374
P07195	LDHB	8	10	12	0	0	1	6	11	10	4.90689	2.88706	0.152003	0.201284
Q00341 (+1)	HDLBP	10	11	11	0	0	0	8	7	8	3.41504	5.22185	0.476438	2.50501
P14868	DARS	11	11	8	0	0	0	10	14	14	3.32193	3.25026	-0.341037	0.733183
Q5JSZ5	PRRC2B	6	7	7	5	8	6	6	8	4	0.0740006	0.129877	0.152003	0.21563
tr|E9PK01|E9PK01_HUMAN	EEF1D	5	7	7	9	9	8	8	7	8	-0.452512	1.45385	-0.275634	0.829304
Q8WUF5	PPP1R13L	10	9	11	0	1	0	10	10	13	4.90689	3.87943	-0.137504	0.36118
P62820	RAB1A	11	13	9	0	0	1	9	11	12	5.04439	3.05061	0.0443941	0.0810271
O43684	BUB3	13	9	10	0	0	0	16	11	9	3.41504	3.05061	-0.169925	0.21563
P35606 (+2)	COPB2	11	15	15	0	0	0	7	7	9	3.77259	3.29158	0.83399	1.80134
O60306	AQR	19	14	15	0	0	0	2	3	6	4	3.3279	2.12553	2.50045
tr|A0A804HL54|A0A804HL54_HUMAN	IARS1	16	15	17	0	0	0	1	8	4	4	5	1.88452	2.28308
tr|H7C4K3|H7C4K3_HUMAN	ITGB1	13	9	11	1	3	3	8	9	7	2.23704	2.5391	0.459432	1.09259
P02786	TFRC	9	17	15	0	0	0	8	8	12	3.77259	2.3256	0.550197	0.721146
Q9UBS4	DNAJB11	11	11	9	0	0	0	10	10	6	3.36923	3.99568	0.253757	0.486564
P40926	MDH2	10	12	12	0	1	1	11	11	12	4.08746	3.85699	0	#VALUE!
Q8NFH5	NUP35	11	10	14	0	0	0	9	9	10	3.54432	3.20066	0.321928	0.870626
O00425	IGF2BP3	12	13	12	0	0	0	13	10	6	3.62449	5.52288	0.351472	0.578158
P35222 (+5)	CTNNB1	12	13	12	0	0	0	8	9	7	3.62449	5.52288	0.624491	2.5391
P36542	ATP5F1C	11	9	8	0	0	0	11	10	12	3.22239	3.34582	-0.237039	0.723529
P54136	RARS	18	13	15	0	0	0	5	9	8	3.9386	3.34104	1.06413	1.87824
P62191	PSMC1	12	12	10	0	0	0	5	11	11	3.5025	4.1549	0.332575	0.480881
P80723	BASP1	5	6	6	7	10	10	6	6	7	-0.667425	1.46713	-0.160465	0.637895
P63162	SNRPN	9	11	9	3	2	3	9	8	8	1.85798	3.14509	0.214125	0.829304
P38919	EIF4A3	10	11	11	0	0	0	6	10	14	3.41504	5.22185	0.0931094	0.102768
Q8N163	CCAR2	13	13	15	0	1	0	6	5	7	5.35755	4.24413	1.18763	3.01592
P42285	MTREX	15	10	14	0	0	0	5	7	11	3.70044	2.98047	0.76184	1.07441
P48735	IDH2	5	6	5	0	0	0	14	16	15	2.41504	4.05061	-1.49185	3.87943
P50897 (+2)	PPT1	11	16	13	0	0	0	7	6	9	3.73697	3.10624	0.862496	1.61566
Q08945	SSRP1	16	11	9	0	0	0	7	7	12	3.58496	2.34737	0.469485	0.553711
Q99460	PSMD1	11	12	16	0	0	0	9	7	10	3.70044	2.98047	0.584963	1.15531
Q7Z5L9	IRF2BP2	8	6	5	4	8	8	7	9	8	-0.0740006	0.0731356	-0.337035	0.723529
Q9UKX7	NUP50	8	12	7	5	6	3	4	8	6	0.947533	1.15531	0.584963	0.716136
tr|E9PK91|E9PK91_HUMAN	BCLAF1	6	5	4	8	7	5	6	3	4	-0.415037	0.723529	0.206451	0.250698
tr|Q6ZN40|Q6ZN40_HUMAN	TPM1	7	3	4	11	5	8	5	6	6	-0.777608	0.723529	-0.280108	0.330121
P63104	YWHAZ	8	8	10	1	2	3	7	5	10	2.11548	2.78489	0.241008	0.345668
O43809	NUDT21	8	13	10	0	0	0	7	8	8	3.36923	2.68487	0.430634	0.829304
P17980 (+1)	PSMC3	14	9	14	0	0	0	7	7	8	3.62449	2.74982	0.750022	1.3735
Q96QC0	PPP1R10	4	3	6	9	11	13	2	4	4	-1.34395	1.99482	0.378512	0.380004
Q71UI9	H2AFV	9	8	7	0	6	5	4	6	8	1.12553	1.04739	0.415037	0.707166
P40939 (+1)	HADHA	10	12	10	0	0	0	5	9	11	3.41504	4.05061	0.356144	0.547292
P60660 (+2)	MYL6	8	6	8	4	8	6	7	5	7	0.289507	0.427243	0.211504	0.457622
tr|A0A0D9SGF6|A0A0D9SGF6_HUMAN	SPTAN1	5	5	2	7	8	5	5	6	7	-0.736966	0.935104	-0.584963	0.800514
tr|A0A3B3ITZ9|A0A3B3ITZ9_HUMAN	THRAP3	6	6	5	6	4	4	9	7	8	0.280108	0.600646	-0.4975	1.60387
Q05048	CSTF1	8	10	10	0	1	1	9	9	12	3.80735	3.50446	-0.0995357	0.21563
O96013	PAK4	14	13	11	0	0	0	3	7	8	3.66297	3.86328	1.078	1.71126
P22234 (+1)	PAICS	10	7	10	0	0	0	9	10	7	3.16993	3.07366	0.0544478	0.0888946
O75554	WBP4	3	6	5	12	12	10	4	5	3	-1.28011	2.41885	0.222392	0.250698
Q13428	TCOF1	6	5	5	5	9	7	4	6	7	-0.392317	0.623795	-0.0874628	0.129877
Q5T5P2	KIAA1217	7	11	9	2	1	2	4	7	9	2.43296	2.43771	0.432959	0.557412
Q9NX02 (+2)	NLRP2	11	9	14	0	0	0	6	8	7	3.5025	2.83654	0.695145	1.29888
P62304	SNRPE	9	7	10	0	0	0	9	11	7	3.11548	3.22113	-0.0544478	0.0810271
Q96BR5	COA7	11	9	10	0	0	0	10	10	10	3.32193	4.18709	0	#VALUE!
tr|A0A087X2I1|A0A087X2I1_HUMAN	PSMC6	14	15	9	0	0	0	6	9	9	3.66297	2.61798	0.662965	1.03972
O43823 (+1)	AKAP8	8	6	6	3	6	3	8	7	8	0.736966	1.04223	-0.201634	0.600646
P84090	ERH	5	8	8	4	4	3	6	6	5	0.932886	1.46713	0.304855	0.561336
Q71DI3	HIST2H3A	2	3	4	4	4	4	2	3	1	-0.415037	0.800514	0.584963	0.540813
Q9UGP4	LIMD1	9	9	9	1	8	7	6	2	5	0.754888	0.772751	1.05445	1.74965
tr|H0YKX5|H0YKX5_HUMAN	TPM1	8	4	5	13	5	0	0	6	6	-0.0824622	0.028189	0.5025	0.288599
P05388	RPLP0	10	13	15	0	0	0	4	5	6	3.66297	3.02045	1.34104	2.09566
Q01085	TIAL1	7	8	8	0	0	0	12	10	10	2.9386	4.67778	-0.476438	1.80134
tr|E7EUC7|E7EUC7_HUMAN	UGP2	6	9	8	0	0	0	4	13	8	2.9386	3.01592	-0.120294	0.0860305
tr|A0A7P0TBF0|A0A7P0TBF0_HUMAN	TNPO1	14	14	18	0	0	0	3	3	2	3.9386	3.48678	2.52356	3.11351
Q9UHV9	PFDN2	5	5	5	6	11	12	4	5	5	-0.95109	1.18215	0.0995357	0.427243
O14964 (+5)	HGS	8	9	6	1	4	3	3	6	7	1.52356	1.79558	0.523562	0.715391
tr|A0A7P0TB04|A0A7P0TB04_HUMAN	BSG	8	8	8	1	3	3	7	9	11	1.77761	2.9784	-0.169925	0.36118
P04843	RPN1	13	10	10	0	0	0	6	9	9	3.45943	3.41117	0.459432	0.994854
P49411	TUFM	8	4	5	0	0	0	12	17	11	2.5025	2.03593	-1.23447	1.591
P53396	ACLY	10	5	11	0	0	0	7	10	10	3.11548	2.02136	-0.0544478	0.0545176
P62140	PPP1CB	9	12	9	0	0	0	8	13	8	3.32193	3.25026	0.0489096	0.0594048
P62701	RPS4X	9	9	10	0	0	0	7	5	8	3.22239	5	0.485427	1.32403
Q92900	UPF1	13	14	15	0	0	0	5	6	5	3.80735	4.76955	1.39232	3.69465
P52594	AGFG1	6	7	7	4	7	8	7	6	6	0.0740006	0.0955647	0.0740006	0.285235
Q15811	ITSN1	5	6	7	2	3	2	1	5	7	1.36257	2.27344	0.469485	0.376813
P60174	TPI1	2	3	4	10	13	17	2	2	2	-2.152	2.09501	0.584963	0.800514
Q12874	SF3A3	17	14	15	0	0	0	2	2	6	3.9386	4.19382	2.20163	2.7734
Q13148	TARDBP	11	10	8	0	0	0	7	8	6	3.27302	3.4045	0.465664	1.18925
tr|C9JX88|C9JX88_HUMAN	PSMC2	9	5	7	0	0	0	7	11	6	2.80735	2.42736	-0.192645	0.201284
P10412	HIST1H1E	6	5	5	5	5	5	6	6	8	0.0931094	0.427243	-0.321928	0.829304
P46379 (+4)	BAG6	5	10	9	3	5	2	3	2	4	1.26303	1.24234	1.41504	1.42493
Q9BTA9	WAC	6	7	5	5	9	8	4	1	3	-0.289507	0.427243	1.16993	1.46713
Q13724	MOGS	9	8	10	0	0	0	5	11	9	3.16993	4.00436	0.111031	0.132181
Q969G3 (+1)	SMARCE1	6	9	9	0	0	0	5	10	8	3	2.87811	0.0614005	0.0658511
tr|A0A3B3IU45|A0A3B3IU45_HUMAN	MCM4	9	11	7	0	0	0	9	6	8	3.16993	2.83505	0.231326	0.386454
P27348	YWHAQ	9	9	11	0	0	0	4	5	7	3.27302	3.87943	0.857981	1.76314
Q96C01	FAM136A	3	3	2	7	13	11	6	6	4	-1.9542	1.88807	-1	1.63423
Q92734 (+1)	TFG	9	11	6	0	2	2	4	5	8	2.70044	1.99452	0.612977	0.728572
tr|A0A087WWU8|A0A087WWU8_HUMAN	TPM3	7	4	5	9	6	6	5	5	6	-0.392317	0.553711	0	#VALUE!
P00338	LDHA	7	6	10	0	0	0	4	6	6	2.9386	2.50892	0.523562	0.783072
P00558	PGK1	14	9	6	0	0	0	5	8	9	3.27302	1.84336	0.398549	0.372394
P36957	DLST	8	8	8	0	0	0	7	11	10	3	#NUM!	-0.222392	0.482197
P46060	RANGAP1	12	8	8	0	0	0	7	6	6	3.22239	2.65916	0.559427	1.02482
P51665	PSMD7	10	11	9	0	0	0	5	9	10	3.32193	4.18709	0.321928	0.540813
Q16531 (+1)	DDB1	6	9	5	0	0	0	11	7	11	2.73697	2.28676	-0.536053	0.769577
Q9Y5X3	SNX5	9	11	12	0	0	0	5	5	8	3.41504	3.57187	0.830075	1.60387
P02765	AHSG	3	3	3	14	6	9	4	3	3	-1.68806	1.33666	-0.152003	0.427243
P28799	GRN	3	1	2	10	8	15	1	3	4	-2.45943	1.85158	-0.415037	0.250698
P62258	YWHAE	8	8	8	0	2	0	5	6	6	3.58496	3.41117	0.4975	2.65916
P29401	TKT	9	9	8	0	0	0	9	7	8	3.11548	4.88606	0.115477	0.427243
P26196	DDX6	11	12	9	0	0	0	3	6	5	3.41504	3.57187	1.19265	2.06646
P41091	EIF2S3	7	10	10	0	0	0	8	10	8	3.16993	3.07366	0.0544478	0.0994936
Q9P2M7	CGN	0	0	0	16	12	11	1	0	1	#NUM!	2.98047	#NUM!	0.935104
Q9H0U4	RAB1B	9	8	8	0	0	0	7	7	9	3.05889	4.82391	0.120294	0.37505
P62136	PPP1CA	9	11	7	0	0	0	0	11	8	3.16993	2.83505	0.50696	0.313148
P05387	RPLP2	6	7	6	6	8	8	3	6	5	-0.211504	0.600646	0.440573	0.818628
P11717	IGF2R	6	5	5	0	1	1	6	5	10	3	3.23359	-0.392317	0.460309
Q9UHD8	SEPTIN9	10	13	10	0	0	0	3	8	6	3.45943	3.41117	0.956931	1.4087
Q86UU0 (+1)	BCL9L	6	7	8	4	6	3	5	4	6	0.691878	1.18925	0.485427	1.15191
P07737	PFN1	4	9	6	4	2	3	7	4	7	1.078	1.00008	0.0780025	0.0658511
Q7Z417	NUFIP2	5	2	3	7	10	8	2	4	3	-1.32193	1.79558	0.152003	0.11484
P62314	SNRPD1	8	7	7	2	0	0	7	9	6	3.45943	3.06349	0	#VALUE!
P98160	HSPG2	6	7	1	0	0	0	14	9	9	2.22239	1.18215	-1.19265	1.1312
P14923	JUP	9	7	8	0	0	0	6	4	6	3	3.8041	0.584963	1.4087
P30048	PRDX3	7	10	9	0	0	0	6	10	12	3.11548	3.22113	-0.106915	0.1236
P46109	CRKL	8	7	11	0	0	0	7	8	11	3.11548	2.70752	0	#VALUE!
P46459 (+1)	NSF	6	7	6	0	0	0	10	10	9	2.66297	4.34679	-0.610053	2.67551
Q10570	CPSF1	5	4	6	0	0	0	7	10	14	2.32193	3.00966	-1.04731	1.18925
Q14126	DSG2	6	5	7	3	3	4	4	7	5	0.847997	1.79237	0.169925	0.250698
O15027	SEC16A	5	4	6	7	8	6	3	5	2	-0.485427	1.15191	0.584963	0.723529
P12830	CDH1	8	8	9	2	2	2	9	5	4	2.05889	4.34679	0.473931	0.678039
tr|A6NEM2|A6NEM2_HUMAN	HCFC1	11	9	8	1	1	2	5	5	8	2.80735	2.97551	0.63743	1.17544
P52292 (+3)	KPNA2	10	14	10	0	0	0	6	5	6	3.5025	2.9784	1	1.83636
P45954	ACADSB	7	5	9	0	0	0	6	12	11	2.80735	2.42736	-0.465664	0.538386
Q99714	HSD17B10	7	8	5	0	0	0	9	10	10	2.73697	2.78489	-0.536053	1.47532
tr|B0QY89|B0QY89_HUMAN	EIF3L	13	9	10	0	0	0	1	5	3	3.41504	3.05061	1.83007	1.99866
O76031	CLPX	13	11	13	0	1	1	3	3	5	4.20945	4.01323	1.75002	3.10902
Q9HCN8	SDF2L1	6	10	10	1	0	0	9	9	6	4.70044	2.42759	0.115477	0.148988
P31153	MAT2A	6	7	9	0	0	0	7	10	7	2.87447	2.94195	-0.125531	0.191566
YP_009227197.1	ZIKV prM	9	10	9	0	0	0	6	6	6	3.22239	5	0.63743	3.25026
Q13438	OS9	6	7	9	3	5	4	4	7	3	0.874469	1.46713	0.652077	0.829304
Q12906	ILF3	7	10	7	0	0	0	5	6	10	3	2.87811	0.192645	0.212532
tr|C9J0Q5|C9J0Q5_HUMAN	NCOR2	8	4	7	3	5	3	6	4	5	0.788496	0.9054	0.341037	0.427243
P38606	ATP6V1A	6	7	6	0	0	0	7	10	11	2.66297	4.34679	-0.559427	1.1312
Q92769	HDAC2	7	8	9	0	0	0	3	6	9	3	3.8041	0.415037	0.475147
O00231	PSMD11	9	5	10	0	0	0	4	7	5	3	2.19709	0.584963	0.688022
P11413	G6PD	6	7	6	0	0	0	6	6	10	2.66297	4.34679	-0.211504	0.294857
Q15717	ELAVL1	6	7	8	0	0	0	6	11	8	2.80735	3.57512	-0.251539	0.354752
P31946	YWHAB	8	9	11	0	0	0	3	3	0	3.22239	3.34582	2.22239	2.27344
P11169	SLC2A3	5	4	8	4	3	3	5	5	6	0.765535	0.870626	0.0874628	0.0955647
Q92783	STAM	9	6	6	2	2	3	5	5	5	1.58496	1.94131	0.485427	0.935104
Q14118	DAG1	1	1	2	13	9	11	2	2	2	-3.04439	2.88706	-0.584963	0.935104
tr|C9JTN7|C9JTN7_HUMAN	TIA1	5	6	6	0	0	0	8	9	8	2.5025	4.1549	-0.556393	2.31758
tr|F8VXC8|F8VXC8_HUMAN	SMARCC2	8	8	6	0	0	0	5	0	5	2.87447	3.41117	1.1375	1.04684
P23771	GATA3	3	2	3	5	6	6	4	5	5	-1.08746	2.50501	-0.807355	1.87824
P62318	SNRPD3	8	5	8	1	2	2	7	8	6	2.07039	2.14375	0	#VALUE!
O43242	PSMD3	6	7	8	0	0	0	5	8	8	2.80735	3.57512	0	#VALUE!
O60341	KDM1A	11	9	7	0	0	0	3	6	6	3.16993	2.83505	0.847997	1.23
tr|A0A7P0Z497|A0A7P0Z497_HUMAN	PPIB	5	5	6	0	0	0	5	4	3	2.41504	4.05061	0.415037	0.935104
P30533	LRPAP1	4	5	4	7	6	2	4	3	5	-0.206451	0.160044	0.115477	0.191566
P09234 (+1)	SNRPC	4	7	4	3	3	1	11	7	6	1.09954	1.04223	-0.678072	0.755246
Q14687	GSE1	8	5	5	2	2	1	9	7	4	1.848	1.83206	-0.152003	0.139866
P05198	EIF2S1	7	7	6	0	0	0	6	8	9	2.73697	4.4318	-0.201634	0.457622
P19387	POLR2C	8	9	9	0	0	0	2	10	8	3.11548	4.88606	0.378512	0.340889
Q15424	SAFB	2	5	2	4	3	2	3	4	5	0	0	-0.415037	0.36118
P62308	SNRPG	3	4	5	1	2	1	5	6	6	1.58496	1.79237	-0.5025	1.17544
tr|A0A0A0MRJ6|A0A0A0MRJ6_HUMAN	PCMT1	5	8	10	1	0	1	5	3	6	3.52356	2.02975	0.716207	0.817252
P38159	RBMX	8	8	5	0	1	0	5	6	6	4.39232	2.49512	0.304855	0.561336
Q9BXS5	AP1M1	8	10	11	0	1	0	0	3	4	4.85798	3.23359	2.05063	2.10056
P26641	EEF1G	7	7	7	0	0	0	6	5	7	2.80735	#NUM!	0.222392	0.800514
P55884	EIF3B	11	9	7	0	0	0	4	8	6	3.16993	2.83505	0.584963	0.853667
Q9UJZ1	STOML2	6	8	8	0	0	0	8	4	9	2.87447	3.41117	0.0671142	0.0699495
tr|G3V0J0|G3V0J0_HUMAN	FMR1	8	7	9	0	0	0	4	7	8	3	3.8041	0.337035	0.553711
P55081	MFAP1	4	5	5	4	4	4	3	4	4	0.222392	0.935104	0.347923	0.994854
Q96PU8	QKI	5	6	9	2	2	2	5	8	5	1.73697	1.74965	0.152003	0.160044
Q8NEY8	PPHLN1	2	2	3	2	2	2	6	5	5	0.222392	0.427243	-1.19265	2.50501
O60749	SNX2	12	10	8	0	0	0	4	4	4	3.32193	3.00966	1.32193	2.18489
O43865	AHCYL1	8	8	9	0	0	0	7	6	5	3.05889	4.82391	0.473931	1.60387
P51149	RAB7A	6	10	8	0	0	0	7	4	5	3	2.64245	0.584963	0.852766
Q15907	RAB11B	7	5	7	0	0	0	6	9	6	2.66297	3.16431	-0.14439	0.21563
Q9P273	TENM3	6	5	9	0	0	0	3	4	9	2.73697	2.28676	0.321928	0.23731
B5ME19 (+1)	EIF3CL	11	10	14	0	0	0	2	3	2	3.54432	3.20066	2.32193	2.76828
Q07065	CKAP4	6	2	3	4	7	5	3	4	4	-0.540568	0.486564	0	#VALUE!
P07602 (+1)	PSAP	4	3	3	6	4	5	2	5	4	-0.584963	1.17544	-0.137504	0.129877
Q9UJY1	HSPB8	7	5	4	0	0	1	5	4	6	4	2.21653	0.0931094	0.11484
P61163	ACTR1A	7	5	7	0	0	0	4	5	4	2.66297	3.16431	0.547488	1.25931
P09012	SNRPA	7	7	6	0	0	0	5	8	8	2.73697	4.4318	-0.0703893	0.11484
P34932	HSPA4	8	8	8	0	0	0	4	5	6	3	#NUM!	0.678072	2.18489
Q6UN15	FIP1L1	5	6	3	3	2	4	5	7	5	0.63743	0.723529	-0.280108	0.380004
tr|G3V2S9|G3V2S9_HUMAN	SLIRP	4	3	3	4	6	6	6	5	5	-0.678072	1.25931	-0.678072	1.87824
P13667	PDIA4	6	7	5	0	0	0	3	5	4	2.58496	3.31515	0.584963	1.15191
tr|A0A7I2V3S3|A0A7I2V3S3_HUMAN	EIF3E	10	6	10	0	0	0	3	3	3	3.11548	2.5391	1.53051	1.88081
sp|P35232|PHB1_HUMAN	PHB1	6	8	6	0	0	0	7	7	9	2.73697	3.25026	-0.201634	0.457622
P13804	ETFA	5	8	7	0	0	0	6	9	7	2.73697	2.78489	-0.137504	0.206693
P15880	RPS2	6	9	7	0	0	0	6	4	5	2.87447	2.94195	0.552541	1.03972
P21912	SDHB	4	5	5	0	0	0	6	6	7	2.22239	3.82102	-0.440573	1.6178
Q2TAY7	SMU1	7	7	6	0	0	0	4	7	7	2.73697	4.4318	0.152003	0.250698
P13674	P4HA1	14	9	13	0	0	0	2	2	1	3.58496	2.84802	2.848	2.56591
P55060	CSE1L	11	9	12	0	0	0	1	3	2	3.41504	3.57187	2.41504	2.92336
Q9UQ35	SRRM2	4	6	5	4	2	2	4	6	5	0.906891	1.24234	0	#VALUE!
Q92804	TAF15	4	5	3	5	4	3	8	3	5	0	0	-0.415037	0.354752
tr|A0A3B3IRU6|A0A3B3IRU6_HUMAN	PEG3	1	2	1	10	9	9	2	1	2	-2.80735	4.14874	-0.321928	0.285235
P17900	GM2A	4	2	5	0	2	1	5	6	6	1.87447	1.18925	-0.628031	0.994854
tr|K7EJE8|K7EJE8_HUMAN (+1)	LONP1	7	6	7	0	0	0	3	5	6	2.73697	4.4318	0.514573	0.994854
P20340	RAB6A	7	4	7	0	0	0	4	7	5	2.58496	2.41083	0.169925	0.191566
Q09028	RBBP4	6	7	9	0	0	0	4	6	7	2.87447	2.94195	0.371969	0.597909
Q12996 (+1)	CSTF3	7	5	10	0	0	0	3	4	4	2.87447	2.1399	1	1.15667
Q86X55	CARM1	8	5	10	0	0	0	5	4	6	2.9386	2.20866	0.616671	0.78707
tr|A0A087WUK2|A0A087WUK2_HUMAN	HNRNPDL	3	0	0	10	7	7	0	0	0	-3	2.10997	0	0.427243
O75694 (+1)	NUP155	11	11	14	0	0	0	0	0	0	3.58496	3.55909	3.58496	3.55909
Q9Y224	RTRAF	5	5	7	0	0	0	2	5	9	2.5025	2.9784	0.0874628	0.0538126
P30626 (+1)	SRI	9	6	7	0	0	0	5	6	4	2.87447	2.94195	0.552541	1.03972
P28331	NDUFS1	5	5	5	0	0	0	8	8	8	2.32193	#NUM!	-0.678072	#NUM!
Q12907	LMAN2	6	8	6	0	0	0	5	6	7	2.73697	3.25026	0.152003	0.308241
Q9BWF3	RBM4	5	5	7	0	0	0	7	8	8	2.5025	2.9784	-0.436099	1.25931
Q13547	HDAC1	6	7	8	0	0	0	1	5	5	2.80735	3.57512	0.932886	1.07845
Q04917	YWHAH	6	6	7	0	0	0	4	3	0	2.66297	4.34679	1.44057	1.48574
P10606	COX5B	2	3	1	6	4	2	2	2	2	-1	0.707166	0	#VALUE!
P54709	ATP1B3	8	7	8	0	1	1	3	2	5	3.52356	3.92082	1.20163	1.9974
P25391	LAMA1	8	6	5	0	1	1	3	4	9	3.24793	2.41364	0.247928	0.18578
Q5JRA6	MIA3	4	6	4	0	2	0	5	6	5	2.80735	1.87824	-0.192645	0.37505
tr|F8WJN3|F8WJN3_HUMAN	CPSF6	9	7	6	0	1	0	5	5	6	4.45943	2.75523	0.459432	0.994854
P32119	PRDX2	3	6	4	0	0	2	5	5	8	2.70044	1.53061	-0.469485	0.553711
P98164	LRP2	5	6	5	0	0	0	10	4	7	2.41504	4.05061	-0.392317	0.39989
P60953	CDC42	7	8	5	0	0	0	6	5	7	2.73697	2.78489	0.152003	0.250698
P61106 (+1)	RAB14	7	5	7	0	0	0	5	7	7	2.66297	3.16431	0	#VALUE!
Q15061	WDR43	4	7	2	0	0	0	5	8	9	2.11548	1.39102	-0.758992	0.728572
Q06210	GFPT1	3	2	3	0	0	0	5	7	14	1.41504	2.87811	-1.70044	1.02482
P23769	GATA2	0	0	0	5	7	7	4	4	3	#NUM!	3.16431	#NUM!	3.41117
Q9BVL2 (+2)	NUP58	3	4	3	4	5	2	5	6	4	-0.137504	0.129877	-0.584963	1.17544
P22392 (+1)	NME2	2	3	3	3	2	3	4	5	2	0	0	-0.459432	0.457622
O43852	CALU	1	2	1	7	7	6	2	2	2	-2.32193	3.45842	-0.584963	0.935104
P46783	RPS10	4	3	6	1	1	1	4	6	6	2.11548	1.71126	-0.29956	0.380004
P62306	SNRPF	5	3	4	1	1	1	4	7	4	2	2.18489	-0.321928	0.36118
Q9Y2B0	CNPY2	0	0	1	8	10	12	2	2	2	-4.90689	2.88706	-2.58496	2.12552
P68402	PAFAH1B2	4	3	6	0	0	0	3	2	7	2.11548	2.09876	0.115477	0.0658511
Q7L576	CYFIP1	8	4	9	0	0	0	5	6	5	2.80735	1.99294	0.392317	0.460309
Q8N1F7	NUP93	8	11	8	0	0	0	3	1	4	3.16993	3.07366	1.75489	2.04716
O94973	AP2A2	6	6	5	0	0	0	7	8	6	2.5025	4.1549	-0.304855	0.935104
P35527	KRT9	3	2	0	0	5	5	0	4	5	-1	0.369892	-0.847997	0.308241
P17676	CEBPB	4	2	2	4	4	4	3	3	2	-0.584963	0.935104	0	#VALUE!
P16615	ATP2A2	9	9	6	0	0	0	3	4	3	3	2.87811	1.26303	1.94131
P55084	HADHB	5	4	6	0	0	0	4	3	6	2.32193	3.00966	0.206451	0.250698
P62280	RPS11	5	4	7	0	0	0	3	3	4	2.41504	2.42343	0.678072	0.994854
P10515 (+2)	DLAT	8	6	4	0	0	0	3	2	3	2.58496	2.18489	1.16993	1.29972
O00410	IPO5	9	11	12	0	0	0	1	1	2	3.41504	3.57187	3	3.23359
Q8WUM4	PDCD6IP	11	7	9	0	0	0	0	6	2	3.16993	2.83505	1.75489	1.40036
Q9Y5L4	TIMM13	3	4	5	3	2	3	6	4	4	0.584963	0.935104	-0.222392	0.308241
P0DP25	CALM3	5	7	3	4	2	3	3	2	4	0.736966	0.707166	0.736966	0.707166
P49321	NASP	2	3	2	6	4	4	2	2	3	-1	1.45385	0	#VALUE!
Q01105	SET	6	5	5	4	6	3	1	1	5	0.29956	0.457622	1.19265	1.02482
tr|G5E972|G5E972_HUMAN	TMPO	7	7	7	2	1	0	3	4	3	2.80735	3.31515	1.07039	3.41117
Q13868	EXOSC2	6	3	3	0	0	0	8	9	8	2	1.79237	-1.05889	1.83206
P16435	POR	6	4	8	0	0	0	3	3	4	2.58496	2.18489	0.847997	1.04223
P23381	WARS	7	5	5	0	0	0	3	8	4	2.5025	2.9784	0.180572	0.148988
P26368	U2AF2	6	6	8	0	0	0	3	4	6	2.73697	3.25026	0.621488	0.989598
P67775	PPP2CA	7	5	7	0	0	0	3	7	6	2.66297	3.16431	0.247928	0.294857
Q9HB71	CACYBP	7	3	7	0	0	0	5	4	6	2.5025	1.88081	0.180572	0.173809
tr|B4DY09|B4DY09_HUMAN	ILF2	6	6	6	0	0	0	5	5	6	2.58496	#NUM!	0.169925	0.935104
O15460	P4HA2	11	6	11	0	0	0	4	3	2	3.22239	2.30173	1.63743	1.63926
Q9NZI8	IGF2BP1	6	5	6	0	0	0	9	5	4	2.5025	4.1549	-0.0824622	0.0748963
P04844	RPN2	7	4	8	0	0	0	0	7	4	2.66297	2.20663	0.788496	0.493316
O60264	SMARCA5	9	10	9	0	0	0	0	1	1	3.22239	5	3.80735	4.29243
Q93062 (+1)	RBPMS	4	7	5	1	2	1	4	4	3	2	1.87824	0.540568	0.818628
Q6NZY4	ZCCHC8	3	5	4	6	4	5	2	1	2	-0.321928	0.540813	1.26303	1.60387
Q9BUJ2 (+3)	HNRNPUL1	8	6	6	0	1	1	2	2	2	3.32193	2.8884	1.73697	2.65916
O60220	TIMM8A	5	4	0	5	3	6	4	4	4	-0.63743	0.39989	-0.415037	0.260884
P62829	RPL23	5	9	5	0	0	1	6	4	5	4.24793	1.92049	0.341037	0.386454
Q8WVC0	LEO1	0	2	1	7	6	6	3	0	3	-2.66297	2.87811	-1	0.36118
P51572	BCAP31	7	6	5	0	0	0	5	4	5	2.58496	3.31515	0.36257	0.935104
tr|A0A0C4DGS1|A0A0C4DGS1_HUMAN	DDOST	4	5	5	0	0	0	4	4	6	2.22239	3.82102	0	#VALUE!
tr|E7ES33|E7ES33_HUMAN	SEPTIN7	6	6	5	0	0	0	6	2	3	2.5025	4.1549	0.628031	0.735008
Q9NVA2 (+2)	SEPTIN11	7	6	9	0	0	0	4	4	5	2.87447	2.94195	0.758992	1.47532
Q9Y266	NUDC	6	8	10	0	0	0	2	5	2	3	2.64245	1.41504	1.51293
Q13162	PRDX4	0	0	0	2	0	0	4	4	8	#NUM!	0.427243	#NUM!	1.79237
tr|B1AHL2|B1AHL2_HUMAN	FBLN1	6	4	4	0	1	1	6	5	6	2.80735	2.235	-0.280108	0.600646
P22087	FBL	6	4	5	0	0	0	6	4	5	2.32193	3.00966	0	#VALUE!
P62277	RPS13	5	6	5	0	0	0	4	4	4	2.41504	4.05061	0.415037	1.79237
Q14498	RBM39	8	5	6	0	0	0	4	6	6	2.66297	2.70093	0.247928	0.380004
P23378	GLDC	7	5	7	0	0	0	3	7	3	2.66297	3.16431	0.547488	0.600646
Q8TEM1	NUP210	8	7	6	0	0	0	2	4	3	2.80735	3.57512	1.22239	2.0942
P48444	ARCN1	8	8	9	0	0	0	1	4	3	3.05889	4.82391	1.64386	2.41364
P61026	RAB10	5	4	6	0	0	0	5	5	6	2.32193	3.00966	-0.0931094	0.191566
Q86VP6	CAND1	8	8	8	0	0	0	1	3	3	3	#NUM!	1.77761	2.9784
O95881	TXNDC12	3	5	3	4	3	3	3	3	4	0.137504	0.168854	0.137504	0.168854
Q13123	IK	1	1	2	5	7	6	1	3	4	-2.16993	2.65916	-1	0.637895
P29558	RBMS1	5	3	5	1	1	2	3	5	3	1.70044	1.80134	0.241008	0.285235
Q27J81 (+2)	INF2	9	5	8	1	1	0	1	1	3	3.45943	2.22878	2.1375	1.83636
tr|A0A087WUT6|A0A087WUT6_HUMAN	EIF5B	6	7	5	0	0	0	3	4	4	2.58496	3.31515	0.710493	1.60387
P60891 (+1)	PRPS1	6	5	4	0	0	0	3	6	6	2.32193	3.00966	0	#VALUE!
P62269	RPS18	7	4	5	0	0	0	5	5	5	2.41504	2.42343	0.0931094	0.139866
Q15008	PSMD6	5	5	6	0	0	0	3	6	4	2.41504	4.05061	0.29956	0.457622
Q8WX93	PALLD	7	7	6	0	0	0	3	5	3	2.73697	4.4318	0.862496	1.80134
Q9BVK6	TMED9	5	6	4	0	0	0	3	4	5	2.32193	3.00966	0.321928	0.540813
tr|K7ELV2|K7ELV2_HUMAN	SEH1L	5	6	6	0	0	0	5	6	2	2.5025	4.1549	0.387023	0.46184
P62873	GNB1	7	5	5	0	0	0	3	3	3	2.5025	2.9784	0.917538	1.79237
Q6UXN9	WDR82	4	5	5	0	0	0	2	3	3	2.22239	3.82102	0.807355	1.87824
tr|J3QL05|J3QL05_HUMAN	SRSF2	2	2	3	4	4	3	3	4	4	-0.652077	1.32403	-0.652077	1.32403
Q8NBS9	TXNDC5	2	2	4	3	4	2	4	2	5	-0.169925	0.139866	-0.459432	0.380004
Q15293	RCN1	2	2	3	9	5	7	1	1	1	-1.58496	1.74965	1.22239	1.79237
P10696	ALPG	4	7	5	0	1	0	6	4	4	4	2.21653	0.192645	0.23731
Q9BS26	ERP44	2	4	4	0	0	0	7	4	6	1.73697	2.12552	-0.765535	0.989598
Q9H3G5	CPVL	4	5	4	0	0	0	7	4	5	2.11548	3.69465	-0.29956	0.457622
tr|A0A7I2YQI2|A0A7I2YQI2_HUMAN	EIF3I	5	5	5	0	0	0	5	5	5	2.32193	#NUM!	0	#NUM!
O43390	HNRNPR	4	3	3	0	0	0	4	4	4	1.73697	3.25026	-0.263034	0.935104
Q5RKV6	EXOSC6	5	5	4	0	0	0	4	4	7	2.22239	3.82102	-0.0995357	0.11484
P17858	PFKL	9	5	7	0	0	0	2	3	4	2.80735	2.42736	1.22239	1.44036
P62879	GNB2	7	2	6	0	0	0	3	3	4	2.32193	1.51293	0.584963	0.460309
tr|Q5T1Z8|Q5T1Z8_HUMAN	PUM1	3	2	4	5	3	4	1	2	3	-0.415037	0.540813	0.584963	0.540813
P67809	YBX1	4	3	3	4	1	3	1	2	1	0.321928	0.285235	1.32193	1.87824
tr|C9JAB2|C9JAB2_HUMAN	SRSF7	2	2	1	6	4	5	4	4	3	-1.58496	2.12552	-1.1375	1.87824
Q99614 (+1)	TTC1	7	5	6	1	1	1	4	2	3	2.58496	3.00966	1	1.67138
P0CG47 (+13)	UBB	0	2	3	3	4	2	0	1	3	-0.847997	0.561336	0.321928	0.0955647
P11166	SLC2A1	5	3	6	0	1	0	2	4	4	3.80735	1.9974	0.485427	0.531275
Q9UL46 (+1)	PSME2	8	4	5	0	0	0	3	4	5	2.5025	2.03593	0.5025	0.553711
tr|E7ETU9|E7ETU9_HUMAN	PLOD2	3	3	3	0	0	0	7	8	7	1.58496	#NUM!	-1.28951	3.69465
P30041	PRDX6	3	2	8	0	0	0	3	6	8	2.11548	1.09786	-0.387023	0.220525
P23142	FBLN1	6	5	5	0	0	0	0	4	0	2.41504	4.05061	2	1.35993
Q15007	WTAP	4	5	4	2	2	3	4	4	2	0.893085	1.87824	0.378512	0.600646
tr|F6VDE0|F6VDE0_HUMAN	SMARCA2	2	3	2	4	3	3	3	3	2	-0.514573	0.994854	-0.192645	0.285235
Q08209	PPP3CA	6	2	4	2	3	2	2	2	4	0.777608	0.623795	0.584963	0.427243
tr|A0A7I2V3T6|A0A7I2V3T6_HUMAN (+1)	BTF3	2	2	2	5	4	5	2	2	3	-1.22239	2.87811	-0.222392	0.427243
E9PAV3	NACA	4	3	4	1	1	1	4	6	5	1.87447	2.87811	-0.447459	0.935104
P24534	EEF1B2	6	5	4	2	0	1	2	5	4	2.32193	2.0942	0.447459	0.561336
tr|A0A024QZP7|A0A024QZP7_HUMAN	CDK1	5	3	4	0	0	1	3	5	4	3.58496	2.27344	0	#VALUE!
O95347	SMC2	10	5	7	0	0	1	3	2	1	4.45943	2.02975	1.87447	1.56868
Q15024	EXOSC7	6	3	5	0	0	0	5	5	5	2.22239	2.21311	-0.0995357	0.139866
tr|D6RAT0|D6RAT0_HUMAN	RPS3A	5	6	3	0	0	0	6	5	5	2.22239	2.21311	-0.192645	0.285235
P21281	ATP6V1B2	4	3	4	0	0	0	6	5	8	1.87447	3.41117	-0.788496	1.32403
P20674	COX5A	2	2	4	3	2	3	3	2	4	0	0	-0.169925	0.139866
P31949	S100A11	2	4	2	2	3	3	5	4	2	0	0	-0.459432	0.380004
Q9Y2V2	CARHSP1	1	1	1	7	10	7	1	1	1	-3	2.65916	0	#NUM!
Q02218 (+2)	OGDH	5	3	5	0	0	0	5	4	6	2.11548	2.5391	-0.206451	0.308241
O00487	PSMD14	2	5	4	0	0	0	5	3	6	1.87447	1.84854	-0.347923	0.330121
P15311	EZR	7	4	5	0	0	0	4	2	2	2.41504	2.42343	1	1.13437
tr|B8ZZA8|B8ZZA8_HUMAN	GLS	5	4	3	0	0	0	4	3	5	2	2.64245	0	#VALUE!
P27635 (+1)	RPL10	5	4	4	0	0	0	3	2	2	2.11548	3.69465	0.893085	1.87824
tr|A0A6Q8PFX2|A0A6Q8PFX2_HUMAN	YARS1	1	3	1	0	0	0	6	4	6	0.736966	1.17544	-1.67807	1.75193
P11388	TOP2A	7	6	7	0	0	0	0	1	1	2.73697	4.4318	3.32193	3.65758
P19105 (+1)	MYL12A	2	2	4	1	1	1	2	3	7	1.41504	1.17544	-0.584963	0.329265
Q14978	NOLC1	4	5	2	3	3	0	4	3	4	0.874469	0.553711	0	#VALUE!
P14854	COX6B1	0	1	1	4	5	4	3	3	2	-2.70044	2.8318	-2	1.87824
tr|F2Z2U4|F2Z2U4_HUMAN (+1)	TRRAP	5	6	6	0	0	1	0	1	3	4.08746	3.45842	2.08746	1.9974
tr|B9A067|B9A067_HUMAN	IMMT	4	4	3	0	0	0	4	4	4	1.87447	3.41117	-0.125531	0.427243
Q9Y285	FARSA	5	4	5	0	0	0	3	5	4	2.22239	3.82102	0.222392	0.427243
P20042	EIF2S2	3	4	3	0	0	0	4	4	3	1.73697	3.25026	-0.137504	0.285235
Q9NQC3	RTN4	4	6	5	0	0	0	4	4	6	2.32193	3.00966	0.0995357	0.139866
Q9NTZ6	RBM12	5	4	6	0	0	0	4	4	3	2.32193	3.00966	0.447459	0.935104
Q92947	GCDH	5	6	2	0	0	0	5	4	4	2.11548	1.64501	0	#VALUE!
Q96HY7	DHTKD1	2	3	3	0	0	0	5	6	9	1.41504	2.87811	-1.32193	1.48574
Q9NPD3	EXOSC4	6	4	5	0	0	0	2	6	5	2.32193	3.00966	0.206451	0.191566
P23921	RRM1	5	5	5	0	0	0	2	5	5	2.32193	#NUM!	0.321928	0.427243
Q86U42	PABPN1	3	2	1	1	2	1	8	4	3	0.584963	0.427243	-1.32193	0.853667
Q9Y2X9	ZNF281	1	1	2	3	5	8	2	2	3	-2	1.25931	-0.807355	0.994854
Q9NUP9	LIN7C	1	1	0	2	3	3	0	1	1	-2	1.87824	0	#VALUE!
P52907	CAPZA1	5	5	4	0	2	1	2	4	3	2.22239	2.27344	0.63743	1.17544
P46013	MKI67	1	1	1	7	4	5	0	1	1	-2.41504	2.09876	0.584963	0.427243
Q9Y3C6	PPIL1	4	3	4	0	0	1	4	4	2	3.45943	2.67551	0.137504	0.168854
Q12904	AIMP1	3	5	4	0	0	0	3	4	3	2	2.64245	0.263034	0.427243
P61019	RAB2A	3	3	5	0	0	0	3	6	7	1.87447	2.27344	-0.540568	0.534656
Q9UKU7	ACAD8	4	4	4	0	0	0	2	4	3	2	#NUM!	0.415037	0.800514
Q9NR31	SAR1A	5	6	5	0	0	0	2	3	6	2.41504	4.05061	0.540568	0.597909
Q10713	PMPCA	2	2	4	0	0	0	3	8	6	1.41504	1.79237	-1.08746	0.873541
P23634	ATP2B4	8	4	5	0	0	0	6	2	2	2.5025	2.03593	0.765535	0.579231
Q6NXG1 (+1)	ESRP1	4	5	5	0	0	0	3	3	1	2.22239	3.82102	1	1.45385
tr|A0A2R8Y425|A0A2R8Y425_HUMAN (+4)	CHD4	6	7	8	0	0	0	1	2	1	2.80735	3.57512	2.39232	2.9784
P22314	UBA1	2	1	1	0	0	0	8	6	4	0.415037	1.79237	-2.16993	1.74965
P08758	ANXA5	4	8	8	0	0	0	1	2	5	2.73697	2.12552	1.32193	1.04684
O00303 (+1)	EIF3F	8	6	5	0	0	0	1	3	3	2.66297	2.70093	1.44057	1.64987
Q8IWJ2	GCC2	0	0	0	5	8	9	1	0	0	#NUM!	2.43771	#NUM!	0.427243
Q16576 (+1)	RBBP7	5	6	5	0	0	0	3	0	0	2.41504	4.05061	2.41504	1.83206
O95758	PTBP3	4	4	3	0	0	0	0	0	0	1.87447	3.41117	1.87447	3.41117
tr|F8VXG7|F8VXG7_HUMAN	SCAF11	4	2	2	1	4	2	3	3	3	0.192645	0.108992	-0.169925	0.191566
P23528	CFL1	3	2	3	3	3	3	2	2	1	-0.169925	0.427243	0.678072	0.994854
Q96AG4	LRRC59	4	4	4	1	1	2	1	2	4	1.58496	2.87811	0.777608	0.880157
Q15532 (+4)	SS18	3	1	1	5	5	4	2	4	1	-1.48543	1.80134	-0.485427	0.23731
tr|A0A087WXM6|A0A087WXM6_HUMAN (+2)	RPL17	4	6	6	0	1	1	0	3	3	3	2.47886	1.41504	1.29972
tr|B5MDF5|B5MDF5_HUMAN	RAN	5	4	4	0	0	0	4	2	2	2.11548	3.69465	0.70044	1.05057
Q8NCA5	FAM98A	7	4	4	0	0	0	3	3	5	2.32193	2.12552	0.447459	0.482197
P22102	GART	5	4	6	0	0	0	3	5	3	2.32193	3.00966	0.447459	0.688022
P62081	RPS7	4	5	4	0	0	0	3	3	4	2.11548	3.69465	0.378512	0.994854
Q9Y2X3	NOP58	5	5	6	0	0	0	3	3	5	2.41504	4.05061	0.540568	1.05057
P46782 (+2)	RPS5	3	2	5	0	0	0	3	3	3	1.73697	1.71126	0.152003	0.139866
P62913 (+1)	RPL11	2	3	2	0	0	0	4	6	6	1.22239	2.65916	-1.19265	1.80134
tr|A0A804HJ17|A0A804HJ17_HUMAN	TPP1	6	6	3	0	0	0	2	4	6	2.32193	2.12552	0.321928	0.260884
Q15436 (+1)	SEC23A	6	6	6	0	0	0	3	2	3	2.58496	#NUM!	1.16993	3.25026
Q99567	NUP88	7	6	5	0	0	0	0	1	2	2.58496	3.31515	2.58496	2.44346
tr|A0A087WZV0|A0A087WZV0_HUMAN	PPIP5K2	8	6	7	0	0	0	0	1	1	2.80735	3.57512	3.39232	3.16431
O60610 (+1)	DIAPH1	6	3	8	0	0	0	0	0	0	2.5025	1.75597	2.5025	1.75597
tr|A0A087X1G7|A0A087X1G7_HUMAN	SELENOF	2	5	5	2	2	1	3	3	2	1.26303	1.03972	0.584963	0.561336
Q15942	ZYX	2	2	3	5	2	1	0	2	1	-0.192645	0.0955647	1.22239	0.935104
P05386	RPLP1	3	1	5	1	2	2	1	3	2	0.847997	0.482197	0.584963	0.317118
Q9C005	DPY30	3	1	2	4	4	3	2	3	1	-0.874469	1.17544	0	#VALUE!
Q14257	RCN2	2	3	3	4	5	3	1	1	1	-0.584963	0.935104	1.41504	2.12552
P18583	SON	5	2	3	2	0	0	4	4	2	2.32193	1.13437	0	#VALUE!
Q8N3F8 (+3)	MICALL1	5	5	4	0	2	2	1	1	2	1.80735	1.9564	1.80735	2.67551
Q9UNF0 (+1)	PACSIN2	5	6	6	0	0	0	3	3	3	2.5025	4.1549	0.917538	2.87811
Q8WUA4	GTF3C2	4	6	6	0	0	0	3	2	4	2.41504	2.87811	0.830075	1.24234
P62249	RPS16	2	2	2	0	0	0	2	1	2	1	#NUM!	0.263034	0.427243
P45880 (+1)	VDAC2	2	2	4	0	0	0	2	1	2	1.41504	1.79237	0.678072	0.600646
AKC88565.1	mCherry	4	2	4	0	0	0	5	5	5	1.73697	2.12552	-0.584963	1.17544
P61586	RHOA	5	6	5	0	0	0	5	1	3	2.41504	4.05061	0.830075	0.905983
P07686	HEXB	1	1	1	0	0	0	5	7	7	0	#NUM!	-2.66297	2.87811
tr|H0Y8E6|H0Y8E6_HUMAN	MCM2	5	6	6	0	0	0	0	3	5	2.5025	4.1549	1.08746	0.941282
Q7Z3B4	NUP54	5	9	8	0	0	0	0	4	0	2.87447	2.43771	2.45943	1.54109
P84103	SRSF3	2	2	3	3	1	2	2	2	2	0.222392	0.191566	0.222392	0.427243
O15031	PLXNB2	1	1	2	2	4	3	3	2	3	-1.16993	1.17544	-1	1.32403
Q9H1B7	IRF2BPL	3	2	3	3	1	2	4	0	2	0.415037	0.427243	0.415037	0.21563
Q9Y624	F11R	2	3	4	2	1	0	2	3	3	1.58496	1.15191	0.169925	0.191566
P63173	RPL38	4	4	4	0	1	0	3	4	3	3.58496	3.41117	0.263034	0.935104
P33176	KIF5B	2	4	2	0	0	0	4	6	3	1.41504	1.79237	-0.70044	0.685815
P51148	RAB5C	5	4	4	0	0	0	4	2	3	2.11548	3.69465	0.530515	0.935104
P62263 (+1)	RPS14	3	3	4	0	0	0	5	5	5	1.73697	3.25026	-0.584963	2.12552
P08865 (+2)	RPSA	2	5	2	0	0	0	3	3	3	1.58496	1.39857	0	#VALUE!
Q99496	RNF2	4	2	4	0	0	0	4	5	5	1.73697	2.12552	-0.485427	0.829304
Q9P2I0	CPSF2	4	5	3	0	0	0	1	3	3	2	2.64245	0.777608	0.880157
Q8N684 (+1)	CPSF7	5	4	4	0	0	0	3	5	1	2.11548	3.69465	0.530515	0.482197
P30040	ERP29	1	4	1	1	2	3	2	3	2	0	0	-0.222392	0.11484
Q13185	CBX3	4	4	3	1	0	0	2	5	2	3.45943	2.67551	0.289507	0.250698
Q8IX12	CCAR1	4	5	4	0	1	0	2	2	2	3.70044	2.97551	1.11548	2.65916
A6NKQ9	CGB1	2	3	4	2	0	0	1	5	1	2.16993	1.24234	0.36257	0.173809
Q07955 (+1)	SRSF1	0	0	1	4	2	2	2	5	2	-3	1.45385	-3.16993	1.18925
tr|A0A6I8PTZ8|A0A6I8PTZ8_HUMAN	AGO1	3	3	3	0	0	0	2	6	5	1.58496	#NUM!	-0.530515	0.482197
O00422	SAP18	1	1	2	0	0	0	3	1	2	0.415037	1.79237	-0.584963	0.427243
Q9NTJ3 (+1)	SMC4	7	3	6	0	0	0	3	1	3	2.41504	1.94481	1.19265	1.02482
Q8WXH0	SYNE2	3	4	5	0	2	0	0	1	4	2.58496	1.71126	1.26303	0.809623
tr|I3L3P7|I3L3P7_HUMAN	RPS15A	5	2	3	0	0	0	4	3	4	1.73697	1.71126	-0.137504	0.129877
P62495	ETF1	5	6	4	0	0	0	3	3	3	2.32193	3.00966	0.736966	1.58971
tr|A0A0J9YVR6|A0A0J9YVR6_HUMAN (+1)	PUF60	3	3	4	0	0	0	2	3	4	1.73697	3.25026	0.152003	0.191566
P48047	ATP5PO	4	5	6	0	0	0	3	4	2	2.32193	3.00966	0.736966	1.15191
tr|Q5T5C7|Q5T5C7_HUMAN	SARS1	5	5	2	0	0	0	2	4	4	2	1.79237	0.263034	0.21563
P49755	TMED10	2	4	2	0	0	0	5	5	3	1.41504	1.79237	-0.70044	0.818628
O15294	OGT	8	2	4	0	0	0	3	3	1	2.22239	1.24234	1	0.547292
O43447	PPIH	1	3	1	0	0	0	1	1	1	0.736966	1.17544	0.736966	0.427243
Q9Y678	COPG1	7	7	6	0	0	0	0	1	0	2.73697	4.4318	4.32193	3.74958
P06454 (+1)	PTMA	4	5	3	2	2	2	1	2	2	1	1.58971	1.26303	1.60387
O60232 (+1)	ZNRD2	2	3	2	2	3	2	1	2	2	0	0	0.485427	0.637895
Q96KR1	ZFR	1	1	1	3	4	4	2	3	3	-1.87447	2.87811	-1.41504	2.12552
Q9HAV7	GRPEL1	2	4	3	1	1	0	2	2	4	2.16993	1.60387	0.169925	0.139866
P55769 (+1)	SNU13	2	4	3	1	1	0	4	3	3	2.16993	1.60387	-0.152003	0.191566
P18669	PGAM1	4	6	3	1	1	0	2	2	2	2.70044	1.75193	1.11548	1.24234
P31939	ATIC	5	4	5	0	0	0	2	3	3	2.22239	3.82102	0.807355	1.87824
Q8ND56	LSM14A	4	3	2	0	0	0	2	3	1	1.58496	2.18489	0.584963	0.540813
P30086	PEBP1	3	3	5	2	4	3	0	0	0	0.289507	0.308241	1.87447	2.27344
P50502	ST13	5	4	3	0	0	0	3	3	5	2	2.64245	0.125531	0.139866
Q13217	DNAJC3	4	3	4	0	0	0	3	3	4	1.87447	3.41117	0.137504	0.285235
P63000	RAC1	3	5	3	0	0	0	4	2	4	1.87447	2.27344	0.137504	0.129877
Q01081	U2AF1	5	4	4	0	0	0	2	3	3	2.11548	3.69465	0.70044	1.6178
Q15428	SF3A2	5	4	3	0	0	0	3	3	2	2	2.64245	0.584963	0.935104
P67870 (+1)	CSNK2B	5	4	5	0	0	0	2	3	3	2.22239	3.82102	0.807355	1.87824
Q96B26	EXOSC8	2	3	4	0	0	0	3	4	4	1.58496	2.18489	-0.289507	0.427243
sp|O43681|GET3_HUMAN	GET3	5	4	4	0	0	0	1	2	3	2.11548	3.69465	1.11548	1.60387
Q15269 (+1)	PWP2	5	1	6	0	0	0	2	3	4	2	1.23	0.415037	0.241548
P14927	UQCRB	0	0	0	6	7	5	0	0	0	#NUM!	3.31515	#NUM!	#NUM!
Q13085	ACACA	8	7	8	0	0	0	0	0	0	2.9386	4.67778	2.9386	4.67778
Q5VT52	RPRD2	2	3	2	2	3	1	2	3	4	0.222392	0.191566	-0.36257	0.427243
O75152	ZC3H11A	2	4	1	1	2	2	4	1	1	0.485427	0.285235	0.222392	0.0888946
tr|A0A590UK80|A0A590UK80_HUMAN	3	2	1	2	3	1	2	2	4	3	-0.263034	0.191566	-0.847997	0.935104
P30049	ATP5F1D	1	0	2	2	3	3	2	4	2	-1.41504	1.17544	-1.41504	0.880157
O00499	BIN1	2	3	2	0	1	3	1	2	3	0.807355	0.457622	0.222392	0.191566
P50454	SERPINH1	3	5	3	0	0	0	3	4	4	1.87447	2.27344	0	#VALUE!
Q16637 (+2)	SMN1	4	4	4	0	0	0	4	3	3	2	#NUM!	0.263034	0.935104
tr|F8VVA7|F8VVA7_HUMAN	COPZ1	4	3	4	0	0	0	3	4	4	1.87447	3.41117	0	#VALUE!
O14734	ACOT8	3	4	4	0	0	0	2	2	3	1.87447	3.41117	0.652077	1.32403
P53597	SUCLG1	3	2	3	0	0	0	5	4	5	1.41504	2.87811	-0.807355	1.87824
O95833	CLIC3	2	3	2	0	0	0	1	2	3	1.22239	2.65916	0.222392	0.191566
Q9H425	C1orf198	0	0	0	3	6	5	1	0	1	#NUM!	2.21311	#NUM!	0.935104
Q9UNH7 (+1)	SNX6	4	5	2	0	0	0	2	0	2	1.87447	1.84854	1.45943	0.989598
O94979 (+1)	SEC31A	5	6	7	0	0	0	1	1	0	2.58496	3.31515	3.16993	2.87811
tr|E7ERS3|E7ERS3_HUMAN	ZC3H18	1	1	1	3	3	3	2	2	1	-1.58496	#NUM!	-0.736966	0.935104
Q9BVJ6	UTP14A	1	2	1	1	1	1	2	3	6	0.415037	0.427243	-1.45943	0.870626
Q9UN79	SOX13	4	1	2	0	4	3	1	1	1	0	0	1.22239	0.688022
Q86V81 (+1)	ALYREF	3	0	1	3	3	2	0	1	1	-1	0.637895	1	0.285235
Q14694	USP10	5	4	4	1	1	0	1	0	2	2.70044	2.8318	2.11548	2.12552
P09874 (+1)	PARP1	3	4	5	0	0	0	3	3	3	2	2.64245	0.415037	0.800514
O95372	LYPLA2	2	3	4	0	0	0	3	4	5	1.58496	2.18489	-0.415037	0.540813
O43399	TPD52L2	3	4	4	0	1	0	0	3	3	3.45943	2.67551	0.874469	0.723529
P49588 (+3)	AARS	3	1	2	0	0	0	3	2	3	1	1.58971	-0.415037	0.427243
Q9Y3D9	MRPS23	3	2	1	0	0	0	6	4	5	1	1.58971	-1.32193	1.67138
tr|F8W787|F8W787_HUMAN	CTSD	1	1	1	0	0	0	6	4	5	0	#NUM!	-2.32193	2.64245
Q13242	SRSF9	0	1	0	5	4	2	1	1	0	-3.45943	1.6178	-1	0.285235
tr|C9JG87|C9JG87_HUMAN	MRPL39	2	0	0	0	0	0	5	9	5	-0.584963	0.427243	-3.24793	1.71938
P26640	VARS	7	6	5	0	0	0	0	0	0	2.58496	3.31515	2.58496	3.31515
O43670 (+2)	ZNF207	2	3	2	2	1	1	2	2	2	0.807355	0.994854	0.222392	0.427243
Q96HA1	POM121	2	1	2	1	3	4	1	1	0	-0.678072	0.457622	1.32193	0.994854
P60866	RPS20	1	2	1	0	0	0	5	3	2	0.415037	1.79237	-1.32193	0.994854
Q8IVL5	P3H2	2	4	2	0	0	0	2	2	1	1.41504	1.79237	0.678072	0.600646
Q86W42	THOC6	4	3	3	0	0	0	2	2	5	1.73697	3.25026	0.152003	0.11484
P15121	AKR1B1	2	2	6	0	0	0	2	2	2	1.73697	1.17544	0.736966	0.427243
Q71RC2	LARP4	3	1	3	0	0	0	3	3	2	1.22239	1.60387	-0.192645	0.168854
Q9GZM7	TINAGL1	5	4	4	0	0	0	1	3	2	2.11548	3.69465	1.11548	1.60387
O00264	PGRMC1	2	3	4	0	0	0	2	3	3	1.58496	2.18489	0.169925	0.191566
tr|A0A2R8YEZ4|A0A2R8YEZ4_HUMAN	POLR1C	1	3	2	0	0	0	3	3	4	1	1.58971	-0.736966	0.935104
Q9NR46 (+1)	SH3GLB2	4	4	5	0	0	0	1	1	2	2.11548	3.69465	1.70044	2.50501
tr|A0A2U3TZU2|A0A2U3TZU2_HUMAN	GPI	5	2	3	0	0	0	2	3	2	1.73697	1.71126	0.514573	0.457622
Q9UKL0	RCOR1	5	2	3	0	0	0	1	2	2	1.73697	1.71126	1	0.818628
P62857	RPS28	0	0	1	4	5	5	0	3	2	-3.80735	3.10902	-2.32193	0.637895
O00232	PSMD12	4	2	7	0	0	0	1	2	3	2.11548	1.39102	1.11548	0.678039
P23258 (+1)	TUBG1	4	3	5	0	0	0	1	3	2	2	2.64245	1	1.15191
P62851	RPS25	0	0	1	3	4	4	2	0	0	-3.45943	2.67551	-1	0.168854
Q9Y2A7	NCKAP1	5	2	5	0	0	0	0	1	2	2	1.79237	2	1.22062
tr|A0A075B730|A0A075B730_HUMAN	EPPK1	5	0	6	0	0	0	0	2	3	1.87447	0.923021	1.1375	0.41397
tr|A0A494C0Z6|A0A494C0Z6_HUMAN	SP3	1	2	1	1	1	3	3	1	1	-0.321928	0.168854	-0.321928	0.168854
tr|A0A3F2YNW7|A0A3F2YNW7_HUMAN (+1)	ARID1B	1	1	1	4	3	4	1	1	3	-1.87447	2.87811	-0.736966	0.427243
O15355	PPM1G	2	4	2	2	1	2	2	1	1	0.678072	0.600646	1	0.829304
tr|Q5T760|Q5T760_HUMAN	SRSF11	2	2	3	1	1	0	3	3	4	1.80735	1.6178	-0.514573	0.994854
tr|A0A2R8Y5A6|A0A2R8Y5A6_HUMAN (+1)	ATXN2	4	2	1	2	3	2	0	2	1	0	0	1.22239	0.561336
P30050	RPL12	4	2	2	0	0	2	2	2	4	2	0.994854	0	#VALUE!
Q9BTC0	DIDO1	1	2	1	3	4	0	0	0	1	-0.807355	0.330121	2	0.994854
Q8NC51	SERBP1	1	1	0	5	3	3	0	1	1	-2.45943	1.80134	0	#VALUE!
Q06323	PSME1	3	2	3	0	0	0	1	4	4	1.41504	2.87811	-0.169925	0.11484
P12004	PCNA	3	4	3	0	0	0	2	4	2	1.73697	3.25026	0.321928	0.37505
tr|B4DZG7|B4DZG7_HUMAN	ARL1	1	2	3	0	0	0	3	4	3	1	1.58971	-0.736966	0.935104
P46781	RPS9	1	2	4	0	0	0	2	2	1	1.22239	1.24234	0.485427	0.285235
tr|H3BVD9|H3BVD9_HUMAN	SPINT1	2	2	2	0	0	0	1	3	4	1	#NUM!	-0.415037	0.308241
P49257	LMAN1	3	2	3	0	0	0	3	1	2	1.41504	2.87811	0.415037	0.427243
P23526	AHCY	3	5	5	0	0	0	2	1	3	2.11548	2.5391	1.11548	1.24234
Q9ULV4	CORO1C	4	1	3	0	0	0	0	4	3	1.41504	1.4087	0.192645	0.0788241
O43815	STRN	6	3	4	0	0	0	1	2	3	2.11548	2.09876	1.11548	1.03972
tr|K9J957|K9J957_HUMAN	PSME3	6	3	3	0	0	0	1	3	1	2	1.79237	1.26303	0.905983
Q8IWA0	WDR75	3	3	4	0	0	0	0	3	3	1.73697	3.25026	0.736966	0.561336
Q9UNM6	PSMD13	5	3	6	0	0	0	1	0	2	2.22239	2.21311	2.22239	1.59541
tr|A0A7P0Z415|A0A7P0Z415_HUMAN	CTSV	0	0	0	2	3	2	1	0	2	#NUM!	2.65916	#NUM!	0.800514
P61916 (+4)	NPC2	0	0	0	4	5	5	0	1	1	#NUM!	3.82102	#NUM!	0.935104
P55145	MANF	0	0	0	3	5	5	0	0	0	#NUM!	2.5391	#NUM!	#NUM!
tr|H7C1L3|H7C1L3_HUMAN	MIDEAS	3	1	2	2	2	2	2	3	1	0	0	0	#VALUE!
O94913	PCF11	2	5	2	0	2	1	1	2	2	1.58496	0.800514	0.847997	0.561336
tr|A0A5H1ZRP2|A0A5H1ZRP2_HUMAN	TGOLN2	2	2	2	0	1	1	3	2	2	1.58496	1.79237	-0.222392	0.427243
P18846	ATF1	2	1	2	2	3	2	0	2	2	-0.485427	0.637895	0.321928	0.168854
tr|F8VX11|F8VX11_HUMAN	EIF4B	2	2	1	0	1	0	2	3	2	2.32193	1.32403	-0.485427	0.637895
P38117	ETFB	2	1	2	0	1	0	4	4	4	2.32193	1.32403	-1.26303	2.65916
Q96EY1	DNAJA3	2	2	2	0	0	0	3	2	2	1	#NUM!	-0.222392	0.427243
P62266	RPS23	3	2	4	0	0	0	3	2	1	1.58496	2.18489	0.584963	0.540813
Q969X6	UTP4	2	2	2	0	0	0	3	4	4	1	#NUM!	-0.874469	2.12552
Q9Y3B3 (+1)	TMED7	3	3	3	0	0	0	3	3	3	1.58496	#NUM!	0	#NUM!
P62875	POLR2L	6	2	1	0	0	0	2	3	1	1.58496	0.9172	0.584963	0.241548
Q92600	CNOT9	1	2	5	0	0	0	2	1	1	1.41504	1.04223	1	0.46184
Q15643	TRIP11	2	2	2	0	1	0	1	0	0	2.58496	2.12552	2.58496	2.12552
Q8NEZ5	FBXO22	3	6	6	0	0	0	1	1	1	2.32193	2.12552	2.32193	1.79237
P13807	GYS1	3	4	5	0	0	0	1	1	2	2	2.64245	1.58496	1.79237
Q07866 (+4)	KLC1	4	4	5	0	0	0	0	2	3	2.11548	3.69465	1.37851	1.32403
Q9Y263	PLAA	4	3	4	0	0	0	1	0	1	1.87447	3.41117	2.45943	2.50501
O14980 (+3)	XPO1	5	1	7	0	0	0	0	0	2	2.11548	1.15531	2.70044	0.907525
sp|Q4VC31|MIX23_HUMAN	MIX23	0	0	0	6	6	6	0	0	0	#NUM!	#NUM!	#NUM!	#NUM!
Q9Y6Q5	AP1M2	5	4	5	0	0	0	0	0	0	2.22239	3.82102	2.22239	3.82102
Q9UN86	G3BP2	4	3	2	0	0	0	0	0	0	1.58496	2.18489	1.58496	2.18489
sp|P22307|SCP2_HUMAN	SCP2	3	0	2	2	1	1	2	2	2	0.321928	0.129877	-0.263034	0.139866
P82979 (+1)	SARNP	0	1	0	2	2	2	1	2	1	-2.58496	2.12552	-2	0.994854
P43487 (+1)	RANBP1	3	2	3	3	2	2	1	0	0	0.192645	0.285235	3	2.10997
Q96F24	NRBF2	1	1	0	1	2	3	1	1	0	-1.58496	0.935104	0	#VALUE!
P01111	NRAS	3	4	3	0	0	0	2	2	3	1.73697	3.25026	0.514573	0.994854
P61204 (+1)	ARF3	2	2	3	0	0	0	3	3	3	1.22239	2.65916	-0.36257	0.935104
Q6ZN17 (+1)	LIN28B	4	3	3	0	0	0	2	3	2	1.73697	3.25026	0.514573	0.994854
Q9UKN8	GTF3C4	4	2	4	0	0	0	1	2	3	1.73697	2.12552	0.736966	0.688022
tr|A0A0C4DG89|A0A0C4DG89_HUMAN	DDX46	4	2	3	0	0	0	2	1	2	1.58496	2.18489	0.847997	0.935104
Q96A33	CCDC47	2	3	3	0	0	0	4	3	1	1.41504	2.87811	0	#VALUE!
tr|A0A0A0MT33|A0A0A0MT33_HUMAN	SCAF8	4	3	1	0	0	0	2	3	3	1.41504	1.4087	0	#VALUE!
P19388	POLR2E	3	2	1	0	0	0	3	3	2	1	1.58971	-0.415037	0.427243
tr|F8W1A4|F8W1A4_HUMAN	AK2	1	2	2	0	0	0	1	4	4	0.736966	2.12552	-0.847997	0.561336
tr|D6REE5|D6REE5_HUMAN	RACK1	3	0	2	0	0	0	4	3	5	0.736966	0.880157	-1.26303	1.03972
A0AV96	RBM47	6	3	4	0	0	0	1	2	0	2.11548	2.09876	2.11548	1.46713
O75886	STAM2	4	0	0	0	0	0	0	0	0	0.415037	0.427243	0.415037	0.427243
tr|F6M2K4|F6M2K4_HUMAN	NCOA6	2	2	2	2	2	2	1	2	1	0	#NUM!	0.584963	0.935104
P31948	STIP1	3	2	2	2	1	0	1	1	2	1.22239	0.935104	0.807355	0.994854
P55036 (+1)	PSMD4	2	4	2	0	0	1	1	3	1	3	1.45385	0.678072	0.457622
Q9UGU0	TCF20	0	1	1	2	4	3	0	0	1	-2.16993	1.60387	1	0.285235
tr|Q4VXZ8|Q4VXZ8_HUMAN	DECR2	2	2	2	0	0	0	2	4	4	1	#NUM!	-0.736966	0.935104
Q9NZB2	FAM120A	2	3	3	0	0	0	2	2	3	1.41504	2.87811	0.192645	0.285235
Q16651	PRSS8	2	2	4	0	0	0	3	3	2	1.41504	1.79237	0	#VALUE!
tr|K7ERF1|K7ERF1_HUMAN	EIF3K	3	3	3	0	0	0	2	1	2	1.58496	#NUM!	0.847997	1.79237
tr|B6VEX4|B6VEX4_HUMAN	ABI1	3	4	2	0	0	0	2	1	2	1.58496	2.18489	0.847997	0.935104
Q9P0L0	VAPA	2	3	2	0	0	0	1	2	2	1.22239	2.65916	0.485427	0.637895
tr|E9PHF7|E9PHF7_HUMAN (+1)	MCCC1	2	3	2	0	0	0	3	1	3	1.22239	2.65916	0	#VALUE!
Q6UUV7	CRTC3	4	3	4	0	0	0	2	1	1	1.87447	3.41117	1.45943	2.10997
Q9Y5J7	TIMM9	0	0	1	1	0	1	3	5	3	-1	0.285235	-3.45943	1.9564
tr|G3V580|G3V580_HUMAN	PRMT5	4	2	2	0	0	0	0	1	3	1.41504	1.79237	1	0.531275
P52435	POLR2J	4	2	2	0	0	0	0	4	2	1.41504	1.79237	0.415037	0.191566
Q9Y4E8	USP15	2	2	5	0	0	0	0	2	1	1.58496	1.39857	1.58496	0.800514
Q8TBA6	GOLGA5	1	1	0	3	4	5	0	0	0	-2.58496	2.12552	-0.584963	0.935104
P25398	RPS12	0	0	0	2	2	4	0	1	1	#NUM!	1.79237	#NUM!	0.935104
Q9NSD9	FARSB	0	0	0	0	0	0	3	4	5	#NUM!	#NUM!	#NUM!	2.64245
O43290	SART1	0	0	0	6	5	2	0	0	0	#NUM!	1.64501	#NUM!	#NUM!
P55268	LAMB2	0	5	2	0	0	0	0	0	0	1.22239	0.736205	1.22239	0.736205
P14174	MIF	1	2	2	2	0	1	2	2	3	0.736966	0.427243	-0.485427	0.637895
tr|F8VXI6|F8VXI6_HUMAN	NAP1L1	3	1	3	0	1	0	2	1	4	2.80735	1.25931	0	#VALUE!
P18206	VCL	2	4	2	0	0	0	1	1	3	1.41504	1.79237	0.678072	0.457622
Q6P2E9	EDC4	4	3	3	1	0	1	0	1	0	2.32193	2.31758	3.32193	2.50501
Q8NI36	WDR36	1	1	1	0	0	0	2	3	3	0	#NUM!	-1.41504	2.12552
P62273	RPS29	0	1	0	0	1	3	0	3	2	-2	0.457622	-2.32193	0.637895
Q9UJQ4	SALL4	3	3	2	0	0	0	3	2	2	1.41504	2.87811	0.192645	0.285235
P52434 (+1)	POLR2H	2	2	2	0	0	0	2	3	2	1	#NUM!	-0.222392	0.427243
P13489	RNH1	2	3	4	0	0	0	1	2	2	1.58496	2.18489	0.847997	0.935104
tr|A0A0A0MSK5|A0A0A0MSK5_HUMAN	TOR1AIP1	3	2	1	0	0	0	2	5	1	1	1.58971	-0.415037	0.191566
tr|B7Z5N7|B7Z5N7_HUMAN	SCFD1	3	3	4	0	0	0	2	1	1	1.73697	3.25026	1.32193	1.87824
P22695	UQCRC2	3	1	2	0	0	0	1	3	4	1	1.58971	-0.415037	0.250698
Q9C0C4	SEMA4C	2	3	1	0	0	0	1	4	3	1	1.58971	-0.415037	0.250698
Q8IYD1	GSPT2	2	1	1	0	0	0	1	5	2	0.415037	1.79237	-1	0.46184
Q9UQ80	PA2G4	0	1	3	0	0	0	1	3	2	0.415037	0.688022	-0.584963	0.250698
Q9BWJ5	SF3B5	2	1	1	0	2	1	0	0	0	0.415037	0.191566	0.415037	1.79237
Q99471 (+1)	PFDN5	4	0	3	0	0	0	2	2	1	1.22239	0.905983	0.485427	0.206693
tr|B1ALK7|B1ALK7_HUMAN	ARHGEF7	4	4	3	0	0	0	0	1	3	1.87447	3.41117	1.45943	1.16376
Q96P70	IPO9	3	3	4	0	0	0	0	0	1	1.73697	3.25026	3.32193	2.50501
Q52LJ0	FAM98B	3	2	0	0	0	0	0	2	3	0.736966	0.880157	0	#VALUE!
tr|M0QZS6|M0QZS6_HUMAN	SAE1	1	0	1	0	0	0	2	0	0	-0.584963	0.935104	0	#VALUE!
Q9C0B5	ZDHHC5	0	0	0	3	4	4	0	0	0	#NUM!	3.41117	#NUM!	#NUM!
P20073	ANXA7	2	4	6	0	0	0	0	0	0	2	1.58971	2	1.58971
P08047	SP1	1	2	1	1	1	1	0	2	2	0.415037	0.427243	0	#VALUE!
tr|B9ZVT1|B9ZVT1_HUMAN	RBM12B	1	1	1	2	2	2	2	1	0	-1	#NUM!	0	#VALUE!
tr|S4R3H4|S4R3H4_HUMAN	ACIN1	1	0	1	1	3	2	0	1	3	-1.58496	0.935104	-1	0.285235
O75376	NCOR1	0	1	1	2	4	3	1	1	0	-2.16993	1.60387	0	#VALUE!
Q9NX63 (+1)	CHCHD3	0	0	0	1	1	0	1	1	3	#NUM!	0.935104	#NUM!	1.17544
P43307 (+1)	SSR1	2	2	3	0	0	0	1	2	2	1.22239	2.65916	0.485427	0.637895
Q7Z6Z7	HUWE1	3	4	1	0	1	1	0	1	0	2	0.994854	3	1.16376
tr|A0A7I2V4K5|A0A7I2V4K5_HUMAN	CTSA	2	2	1	0	0	0	2	3	2	0.736966	2.12552	-0.485427	0.637895
Q6I9Y2	THOC7	2	3	1	0	0	0	1	0	1	1	1.58971	1.58496	0.935104
Q9Y2Z0	SUGT1	2	2	3	0	0	0	2	2	2	1.22239	2.65916	0.222392	0.427243
tr|C9JXB8|C9JXB8_HUMAN	RPL24	2	2	2	0	0	0	3	3	2	1	#NUM!	-0.415037	0.935104
P61224	RAP1B	2	2	2	0	0	0	1	3	2	1	#NUM!	0	#VALUE!
P08754	GNAI3	1	3	2	0	0	0	2	2	1	1	1.58971	0.263034	0.191566
P05455	SSB	3	0	2	0	0	0	1	1	1	0.736966	0.880157	0.736966	0.308241
Q8NAV1	PRPF38A	3	2	3	0	0	0	1	2	3	1.41504	2.87811	0.415037	0.427243
Q16186	ADRM1	2	4	2	0	0	0	2	1	2	1.41504	1.79237	0.678072	0.600646
P13796	LCP1	1	3	3	0	0	0	1	3	3	1.22239	1.60387	0	#VALUE!
P23919	DTYMK	1	0	1	0	0	0	1	3	3	-0.584963	0.935104	-1.80735	1.05057
tr|A0A7P0T9N9|A0A7P0T9N9_HUMAN (+1)	ACAD9	1	1	1	0	0	0	3	3	4	0	#NUM!	-1.73697	2.65916
P13995	MTHFD2	1	2	2	0	0	0	1	2	4	0.736966	2.12552	-0.485427	0.285235
Q9UBV8	PEF1	2	2	3	0	0	0	1	1	2	1.22239	2.65916	0.807355	0.994854
O15446	CD3EAP	0	0	1	3	2	2	0	2	0	-2.80735	1.87824	-1	0.168854
Q13769	THOC5	1	2	5	0	0	0	0	2	3	1.41504	1.04223	0.678072	0.268347
P37837	TALDO1	0	2	1	0	0	0	3	6	2	0	0.800514	-1.87447	0.935104
Q13033	STRN3	4	1	3	0	0	0	0	0	3	1.41504	1.4087	1.41504	0.553711
Q9Y5A9	YTHDF2	0	4	3	0	0	0	2	0	3	1.22239	0.905983	0.485427	0.168854
P61088	UBE2N	4	5	4	0	0	0	0	0	1	2.11548	3.69465	3.70044	2.97551
tr|A0A6Q8PG15|A0A6Q8PG15_HUMAN (+1)	AIFM1	1	0	0	0	0	0	4	5	3	-1.58496	0.427243	-3.58496	2.27344
P49454	CENPF	0	0	0	1	4	2	0	0	0	#NUM!	1.24234	#NUM!	#NUM!
P53618	COPB1	6	3	5	0	0	0	0	0	0	2.22239	2.21311	2.22239	2.21311
Q99417 (+1)	MYCBP	2	2	2	0	1	2	1	1	2	1	0.800514	0.584963	0.935104
Q96EV2 (+1)	RBM33	2	2	1	0	2	2	2	1	1	0.321928	0.168854	0.321928	0.285235
P62310	LSM3	1	1	1	3	2	1	0	1	1	-1	0.800514	0.584963	0.427243
Q9NUK0 (+1)	MBNL3	2	1	2	0	1	0	2	1	2	2.32193	1.32403	0	#VALUE!
Q15185 (+1)	PTGES3	3	0	2	1	0	0	0	1	1	2.32193	0.637895	1.32193	0.457622
P32969 (+1)	RPL9	2	2	1	0	0	0	1	1	2	0.736966	2.12552	0.321928	0.285235
Q99536	VAT1	2	1	2	0	0	0	1	1	1	0.736966	2.12552	0.736966	0.935104
Q99470	SDF2	3	2	2	0	0	0	0	2	2	1.22239	2.65916	0.807355	0.600646
O95239	KIF4A	1	2	4	0	0	0	2	2	1	1.22239	1.24234	0.485427	0.285235
Q08J23	NSUN2	3	2	2	0	0	0	3	2	1	1.22239	2.65916	0.222392	0.191566
P63167	DYNLL1	2	2	3	0	0	0	1	2	2	1.22239	2.65916	0.485427	0.637895
tr|B1AJY7|B1AJY7_HUMAN	PSMD10	4	2	2	0	0	0	1	2	2	1.41504	1.79237	0.678072	0.600646
P35268	RPL22	2	3	1	0	0	0	3	2	2	1	1.58971	-0.222392	0.191566
Q9BY77 (+1)	POLDIP3	2	3	1	0	0	0	1	3	1	1	1.58971	0.263034	0.139866
Q99961	SH3GL1	2	2	2	0	0	0	1	1	2	1	#NUM!	0.584963	0.935104
P10253	GAA	1	1	2	2	2	3	0	0	0	-0.807355	0.994854	0.415037	1.79237
tr|A0A7P0SNI2|A0A7P0SNI2_HUMAN	TEAD3	1	2	1	0	0	0	3	3	2	0.415037	1.79237	-1	1.32403
P50570	DNM2	2	1	4	0	1	0	1	1	1	2.80735	0.994854	1.22239	0.688022
Q9Y5B9	SUPT16H	2	1	3	0	0	0	0	1	1	1	1.58971	1.58496	0.935104
tr|A0A804HHR9|A0A804HHR9_HUMAN	KMT2D	0	0	3	1	3	4	0	1	0	-1.41504	0.553711	1.58496	0.250698
Q9NP72	RAB18	3	2	2	0	0	0	0	3	2	1.22239	2.65916	0.485427	0.285235
Q8N8S7	ENAH	0	0	1	1	4	1	1	0	0	-2.58496	0.723529	0	#VALUE!
Q13492	PICALM	3	4	2	0	0	0	0	3	1	1.58496	2.18489	1.16993	0.723529
Q96DI7	SNRNP40	2	1	2	0	0	0	0	1	4	0.736966	2.12552	0	#VALUE!
A5D8V6 (+1)	VPS37C	3	3	1	0	0	0	0	3	3	1.22239	1.60387	0.222392	0.0994936
P18085	ARF4	1	2	3	0	0	0	0	2	2	1	1.58971	0.584963	0.308241
P49406	MRPL19	0	1	0	0	0	0	2	3	4	-1.58496	0.427243	-3.16993	1.79237
P43246	MSH2	3	2	4	0	0	0	0	2	0	1.58496	2.18489	2.16993	1.24234
Q9GZV4 (+2)	EIF5A2	1	2	2	1	1	1	1	1	1	0.736966	0.935104	0.736966	0.935104
Q8NEJ9	NGDN	1	2	2	0	1	1	1	2	1	1.32193	0.994854	0.321928	0.285235
tr|A0A2R8Y4P4|A0A2R8Y4P4_HUMAN (+2)	SMARCA4	0	1	1	2	2	2	1	1	2	-1.58496	1.79237	-1	0.637895
P37108	SRP14	2	2	1	0	0	1	2	2	1	2.32193	1.32403	0	#VALUE!
P53999	SUB1	1	0	1	1	0	0	0	2	1	1	0.285235	-0.584963	0.191566
Q9NP97	DYNLRB1	2	2	0	1	0	1	0	1	0	1	0.37505	2	0.600646
Q9BV40	VAMP8	2	2	2	0	0	0	2	2	2	1	#NUM!	0	#NUM!
tr|A0A804HJD7|A0A804HJD7_HUMAN	GLUD1	2	2	2	0	0	0	1	2	2	1	#NUM!	0.263034	0.427243
O14684	PTGES	2	2	2	0	0	0	1	1	2	1	#NUM!	0.584963	0.935104
P31930	UQCRC1	2	3	1	0	0	0	2	1	2	1	1.58971	0.263034	0.191566
P60468	SEC61B	2	3	2	0	0	0	2	2	1	1.22239	2.65916	0.485427	0.637895
Q9H3N1	TMX1	2	2	2	0	0	0	2	2	1	1	#NUM!	0.263034	0.427243
Q5VZF2 (+1)	MBNL2	1	2	2	0	0	0	2	2	2	0.736966	2.12552	-0.263034	0.427243
O75396	SEC22B	1	3	3	0	0	0	1	2	1	1.22239	1.60387	0.807355	0.600646
Q99623 (+1)	PHB2	2	1	2	0	0	0	3	2	1	0.736966	2.12552	-0.263034	0.191566
Q92665	MRPS31	2	1	2	0	0	0	2	2	3	0.736966	2.12552	-0.485427	0.637895
P82912	MRPS11	1	1	2	0	0	0	3	3	2	0.415037	1.79237	-1	1.32403
Q9Y3F4	STRAP	3	2	1	0	0	0	2	1	2	1	1.58971	0.263034	0.191566
Q3MHD2 (+1)	LSM12	2	3	3	0	0	0	1	2	1	1.41504	2.87811	1	1.32403
P00533	EGFR	3	3	1	0	0	0	2	1	2	1.22239	1.60387	0.485427	0.37505
Q9BYJ9	YTHDF1	3	2	1	0	0	0	1	1	1	1	1.58971	1	0.800514
P24928 (+1)	POLR2A	2	0	2	0	0	0	3	2	1	0.415037	0.935104	-0.584963	0.308241
tr|D6R9Z7|D6R9Z7_HUMAN	COX7C	0	0	0	2	1	1	0	0	0	#NUM!	1.79237	#NUM!	#NUM!
tr|D6RBW1|D6RBW1_HUMAN	EIF4E	3	3	2	0	0	0	0	2	1	1.41504	2.87811	1.41504	1.17544
tr|C9JDR0|C9JDR0_HUMAN	NSDHL	0	3	3	0	0	0	1	0	2	1	0.935104	1	0.36118
Q9NR30	DDX21	3	1	4	0	0	0	0	1	2	1.41504	1.4087	1.41504	0.723529
P55197 (+1)	MLLT10	1	0	0	2	2	3	0	0	0	-2.80735	1.87824	-1.58496	0.427243
Q9GZL7	WDR12	0	1	1	0	0	0	2	3	5	-0.584963	0.935104	-2.32193	1.32403
Q7L3T8	PARS2	3	0	0	0	0	0	2	0	1	0	0.427243	0	#VALUE!
tr|E9PB90|E9PB90_HUMAN	HK2	0	0	1	0	0	0	1	4	6	-1.58496	0.427243	-3.45943	1.05057
P39019	RPS19	0	0	0	3	3	2	0	1	0	#NUM!	2.87811	#NUM!	0.427243
tr|F8W8N3|F8W8N3_HUMAN	SKP1	0	3	2	0	0	0	1	0	0	0.736966	0.880157	2.32193	0.637895
P78344 (+1)	EIF4G2	3	5	3	0	0	0	0	0	0	1.87447	2.27344	1.87447	2.27344
sp|P48960|AGRE5_HUMAN	ADGRE5	0	0	0	4	3	3	0	0	0	#NUM!	3.25026	#NUM!	#NUM!
tr|S4R369|S4R369_HUMAN	MRPL37	0	0	0	0	0	0	2	5	4	#NUM!	#NUM!	#NUM!	1.84854
Q9Y6Q9	NCOA3	1	1	2	0	1	2	1	1	1	0.415037	0.191566	0.415037	0.427243
Q14789	GOLGB1	2	1	3	1	1	0	0	2	1	1.58496	0.935104	1	0.540813
P13073	COX4I1	2	1	1	0	1	0	2	1	2	2	0.994854	-0.321928	0.285235
tr|H3BU16|H3BU16_HUMAN	JPT2	2	1	0	1	1	1	1	1	0	0	0	0.584963	0.191566
tr|A0A087WZ13|A0A087WZ13_HUMAN	RAVER1	2	2	1	0	0	1	1	1	3	2.32193	1.32403	0	#VALUE!
Q8NC74	RBBP8NL	1	1	1	0	3	1	1	0	1	-0.415037	0.139866	0.584963	0.427243
tr|K7ELW0|K7ELW0_HUMAN	PARK7	1	1	1	1	1	2	0	1	0	-0.415037	0.427243	1.58496	0.935104
tr|K7ELX4|K7ELX4_HUMAN	FECH	2	1	2	0	0	0	2	2	2	0.736966	2.12552	-0.263034	0.427243
tr|H7C3S9|H7C3S9_HUMAN	COPS8	2	2	1	0	0	0	1	2	2	0.736966	2.12552	0	#VALUE!
O00161	SNAP23	2	2	0	0	1	0	2	3	1	2	0.600646	-0.584963	0.308241
tr|V9GZ59|V9GZ59_HUMAN	WDR5	2	2	1	0	0	0	3	1	1	0.736966	2.12552	0	#VALUE!
Q9BPW8	NIPSNAP1	1	1	1	0	0	0	2	1	1	0	#NUM!	-0.415037	0.427243
P51571	SSR4	1	1	2	0	0	0	2	2	3	0.415037	1.79237	-0.807355	0.994854
P35269	GTF2F1	0	1	0	1	1	3	0	1	1	-2.32193	0.829304	-1	0.285235
Q9GZV5	WWTR1	1	0	1	0	1	1	2	1	0	0	0	-0.584963	0.191566
O14874	BCKDK	1	2	1	0	0	0	1	1	1	0.415037	1.79237	0.415037	0.427243
Q9BTE3	MCMBP	1	2	3	0	0	0	2	1	2	1	1.58971	0.263034	0.191566
Q9UKM9	RALY	1	2	1	0	0	0	2	2	0	0.415037	1.79237	0	#VALUE!
O60573	EIF4E2	2	2	2	0	0	0	1	1	1	1	#NUM!	1	#NUM!
O94776	MTA2	0	1	1	2	2	2	0	0	0	-1.58496	1.79237	-0.584963	0.935104
tr|B1AK88|B1AK88_HUMAN	CAPZB	2	2	2	0	0	0	3	0	2	1	#NUM!	0.263034	0.139866
P46779	RPL28	2	2	1	0	0	0	0	1	1	0.736966	2.12552	1.32193	0.994854
tr|H0YL72|H0YL72_HUMAN	IDH3A	0	1	1	0	0	0	1	3	2	-0.584963	0.935104	-1.58496	0.935104
tr|A0A087WZR3|A0A087WZR3_HUMAN (+2)	BRCC3	1	4	3	0	0	0	0	1	2	1.41504	1.4087	1.41504	0.723529
P46777	RPL5	1	0	0	0	0	0	2	0	0	-1.58496	0.427243	-1	0.168854
Q15369 (+1)	ELOC	2	2	4	0	0	0	0	0	3	1.41504	1.79237	1.41504	0.623795
O95602	POLR1A	0	0	2	0	0	0	1	2	3	-0.584963	0.427243	-1.58496	0.688022
O75718 (+1)	CRTAP	2	2	2	0	0	0	0	1	0	1	#NUM!	2.58496	2.12552
O43747	AP1G1	3	3	5	0	0	0	0	0	0	1.87447	2.27344	1.87447	2.27344
Q9UPT8	ZC3H4	0	0	0	3	4	3	0	0	0	#NUM!	3.25026	#NUM!	#NUM!
P27694	RPA1	3	2	3	0	0	0	0	0	0	1.41504	2.87811	1.41504	2.87811
P63220 (+1)	RPS21	0	0	0	5	2	3	0	0	0	#NUM!	1.71126	#NUM!	#NUM!
P49757 (+1)	NUMB	1	1	1	1	0	1	1	2	2	0.584963	0.427243	-0.736966	0.935104
tr|C9JU34|C9JU34_HUMAN	RREB1	0	0	0	1	2	1	1	1	1	#NUM!	1.79237	#NUM!	#NUM!
tr|F5H5P2|F5H5P2_HUMAN	F5H5P2	2	2	1	0	0	0	3	1	1	0.736966	2.12552	0	#VALUE!
tr|A0A7P0Z4K3|A0A7P0Z4K3_HUMAN	ADAR	2	1	1	0	0	0	1	2	1	0.415037	1.79237	0	#VALUE!
tr|A0A7P0TAG0|A0A7P0TAG0_HUMAN	MMP14	1	1	2	1	0	1	0	1	0	1	0.637895	2	0.994854
P63172	DYNLT1	3	2	1	0	0	0	2	1	1	1	1.58971	0.584963	0.427243
Q16706	MAN2A1	2	2	1	0	0	0	1	1	2	0.736966	2.12552	0.321928	0.285235
Q9UL25	RAB21	1	2	1	0	0	0	2	1	2	0.415037	1.79237	-0.321928	0.285235
P42566	EPS15	1	0	1	0	5	1	0	1	1	-1.58496	0.354752	0	#VALUE!
P49458	SRP9	1	2	1	0	0	0	1	3	2	0.415037	1.79237	-0.584963	0.427243
P51970	NDUFA8	1	1	1	0	0	0	1	2	4	0	#NUM!	-1.22239	0.688022
P62841 (+1)	RPS15	2	3	1	0	0	0	1	1	1	1	1.58971	1	0.800514
Q13952	NFYC	1	4	1	0	0	0	1	1	1	1	0.935104	1	0.427243
Q16718 (+1)	NDUFA5	1	1	1	0	0	0	2	3	2	0	#NUM!	-1.22239	1.79237
Q92733	PRCC	3	0	0	0	1	0	1	2	2	1.58496	0.250698	-0.736966	0.250698
Q6P1K8	GTF2H2C	1	2	2	0	0	0	0	2	2	0.736966	2.12552	0.321928	0.168854
P00403	MT-CO2	2	1	2	0	0	0	0	3	2	0.736966	2.12552	0	#VALUE!
Q01650	SLC7A5	3	2	1	0	0	0	0	2	1	1	1.58971	1	0.540813
tr|H0YJA2|H0YJA2_HUMAN	ZC3H14	1	0	0	2	2	3	0	1	0	-2.80735	1.87824	0	#VALUE!
P56545	CTBP2	1	0	2	0	0	0	2	2	1	0	0.800514	-0.736966	0.427243
tr|H7C4X9|H7C4X9_HUMAN	ZMYND8	1	2	0	0	0	0	0	2	1	0	0.800514	0	#VALUE!
tr|A0A087WZF1|A0A087WZF1_HUMAN	LPP	0	0	1	0	2	2	0	0	0	-2	0.600646	-1.58496	0.427243
Q9Y3B4	SF3B6	3	2	3	0	0	0	0	0	1	1.41504	2.87811	3	2.10997
tr|G3V4Z4|G3V4Z4_HUMAN	ALDH6A1	1	0	0	0	0	0	2	3	3	-1.58496	0.427243	-3	2.10997
P14543	NID1	0	0	1	0	0	0	0	1	3	-1.58496	0.427243	-2	0.457622
O95433	AHSA1	2	1	2	0	0	0	0	0	0	0.736966	2.12552	0.736966	2.12552
Q13155	AIMP2	3	3	3	0	0	0	0	0	0	1.58496	#NUM!	1.58496	#NUM!
Q14247	CTTN	0	0	0	4	2	2	0	0	0	#NUM!	1.79237	#NUM!	#NUM!
Q5SYE7	NHSL1	0	0	0	1	3	4	0	0	0	#NUM!	1.4087	#NUM!	#NUM!
tr|A0A7P0TA13|A0A7P0TA13_HUMAN	DYNC1H1	5	1	4	0	0	0	0	0	0	1.73697	1.29972	1.73697	1.29972
tr|K7ER08|K7ER08_HUMAN	RBM42	1	1	2	1	1	1	0	1	1	0.415037	0.427243	1	0.637895
Q9UBI6	GNG12	1	1	1	0	0	0	1	1	2	0	#NUM!	-0.415037	0.427243
Q06265 (+1)	EXOSC9	1	2	1	0	0	0	2	1	2	0.415037	1.79237	-0.321928	0.285235
P53634 (+3)	CTSC	2	1	1	0	0	0	2	2	1	0.415037	1.79237	-0.321928	0.285235
Q68CZ2	TNS3	1	1	0	2	1	2	0	1	0	-1.32193	0.994854	1	0.285235
Q07021	C1QBP	2	1	2	1	0	1	0	0	2	1.32193	0.994854	1.32193	0.600646
P10586	PTPRF	1	1	1	0	0	0	2	1	0	0	#NUM!	0	#VALUE!
P04062	GBA	1	2	2	0	0	0	1	2	1	0.736966	2.12552	0.321928	0.285235
Q9UNS2	COPS3	2	2	2	0	0	0	1	1	1	1	#NUM!	1	#NUM!
O60479	DLX3	1	1	2	0	0	0	1	1	1	0.415037	1.79237	0.415037	0.427243
Q86YP4	GATAD2A	1	1	1	0	0	0	2	1	1	0	#NUM!	-0.415037	0.427243
tr|E9PHS0|E9PHS0_HUMAN	LANCL1	1	0	2	0	0	0	1	1	1	0	0.800514	0	#VALUE!
P82673	MRPS35	1	1	1	0	0	0	1	1	3	0	#NUM!	-0.736966	0.427243
tr|A2A274|A2A274_HUMAN	ACO2	1	2	1	0	0	0	2	2	1	0.415037	1.79237	-0.321928	0.285235
O95292	VAPB	2	1	2	0	0	0	1	1	2	0.736966	2.12552	0.321928	0.285235
Q9Y3D0	CIAO2B	1	2	0	0	1	0	1	0	2	1.58496	0.427243	0	#VALUE!
tr|H7BY37|H7BY37_HUMAN	KMT2C	0	0	0	1	2	2	0	1	1	#NUM!	2.12552	#NUM!	0.935104
P63279 (+2)	UBE2I	2	1	1	0	0	0	2	1	0	0.415037	1.79237	0.415037	0.191566
Q8NE71 (+1)	ABCF1	2	2	1	0	0	0	0	1	2	0.736966	2.12552	0.736966	0.427243
P16422 (+1)	EPCAM	1	3	0	0	0	0	2	2	1	0.415037	0.688022	-0.321928	0.129877
O43660	PLRG1	1	0	1	0	0	0	2	2	2	-0.584963	0.935104	-1.58496	1.79237
P09661	SNRPA1	2	2	1	0	0	0	0	1	0	0.736966	2.12552	2.32193	1.32403
P46977	STT3A	1	1	3	0	0	0	0	1	3	0.736966	1.17544	0.321928	0.108992
tr|E9PHA2|E9PHA2_HUMAN	NCAPH	2	3	1	0	0	0	0	1	1	1	1.58971	1.58496	0.935104
O75915	ARL6IP5	3	3	1	0	0	0	0	0	1	1.22239	1.60387	2.80735	1.25931
O43837 (+2)	IDH3B	0	0	1	0	0	0	1	1	2	-1.58496	0.427243	-2	0.994854
tr|H9KV45|H9KV45_HUMAN	UBE2D3	3	2	2	0	0	0	0	0	1	1.22239	2.65916	2.80735	1.87824
P56192	MARS	1	2	2	0	0	0	0	1	0	0.736966	2.12552	2.32193	1.32403
tr|F8VVM2|F8VVM2_HUMAN	SLC25A3	0	2	2	0	0	0	1	2	0	0.415037	0.935104	0.415037	0.139866
P02749	APOH	0	0	0	2	2	2	0	0	0	#NUM!	#NUM!	#NUM!	#NUM!
Q96GA3	LTV1	0	0	0	1	3	3	0	0	0	#NUM!	1.60387	#NUM!	#NUM!
Q9Y6A5 (+1)	TACC3	0	0	0	2	4	1	0	0	0	#NUM!	1.24234	#NUM!	#NUM!
Q13796	SHROOM2	1	0	0	0	4	3	0	0	0	-2.80735	0.735008	-1.58496	0.427243
tr|A0A5F9ZHL1|A0A5F9ZHL1_HUMAN	ACAT1	1	0	0	0	0	0	0	2	3	-1.58496	0.427243	-2.32193	0.637895
O75323	NIPSNAP2	0	0	0	0	0	0	0	2	1	#NUM!	#NUM!	#NUM!	0.800514
P56385	ATP5ME	1	1	1	1	0	0	2	1	1	1.58496	0.935104	-0.415037	0.427243
O94826	TOMM70	1	2	1	0	0	0	2	1	1	0.415037	1.79237	0	#VALUE!
O15260 (+1)	SURF4	1	1	2	0	0	0	1	1	1	0.415037	1.79237	0.415037	0.427243
Q71UM5 (+1)	RPS27L	2	1	1	0	0	0	1	1	2	0.415037	1.79237	0	#VALUE!
Q7RTV0	PHF5A	1	1	1	3	1	1	0	0	0	-0.736966	0.427243	0	#NUM!
tr|M0QY01|M0QY01_HUMAN	M0QY01	0	1	1	1	2	1	1	0	0	-1	0.637895	1	0.285235
Q9NWT6	HIF1AN	1	0	1	0	0	0	2	1	2	-0.584963	0.935104	-1.32193	0.994854
tr|H0YIV9|H0YIV9_HUMAN	H0YIV9	0	0	0	1	2	2	1	1	1	#NUM!	2.12552	#NUM!	#NUM!
Q96PN7 (+1)	TRERF1	0	0	0	1	2	2	1	1	1	#NUM!	2.12552	#NUM!	#NUM!
P30044	PRDX5	1	0	0	1	2	1	0	0	1	-2	0.994854	0	#VALUE!
P19623	SRM	2	1	1	0	0	0	0	1	2	0.415037	1.79237	0.415037	0.191566
Q6PKG0	LARP1	1	1	1	0	0	0	0	1	2	0	#NUM!	0	#VALUE!
P61158	ACTR3	2	1	2	0	0	0	1	0	2	0.736966	2.12552	0.736966	0.427243
Q9NZI5	GRHL1	2	1	2	0	0	0	1	0	2	0.736966	2.12552	0.736966	0.427243
P98175	RBM10	2	1	1	0	0	0	1	1	0	0.415037	1.79237	1	0.637895
Q7L5N1 (+1)	COPS6	2	1	1	0	0	0	0	1	2	0.415037	1.79237	0.415037	0.191566
Q9Y2Q9	MRPS28	1	0	1	0	0	0	3	2	1	-0.584963	0.935104	-1.58496	0.935104
Q92754	TFAP2C	1	3	1	0	0	0	1	0	2	0.736966	1.17544	0.736966	0.308241
Q02790	FKBP4	0	1	1	0	0	0	1	2	3	-0.584963	0.935104	-1.58496	0.935104
P60903	S100A10	2	1	2	0	0	0	0	1	2	0.736966	2.12552	0.736966	0.427243
Q9BST9	RTKN	3	1	1	0	0	0	0	1	1	0.736966	1.17544	1.32193	0.600646
tr|A0A0D9SEY1|A0A0D9SEY1_HUMAN	MAP4K4	1	0	1	0	0	0	0	2	1	-0.584963	0.935104	-0.584963	0.191566
Q7L2H7	EIF3M	1	0	3	0	0	0	1	1	0	0.415037	0.688022	1	0.285235
Q9H4A6	GOLPH3	1	0	2	0	0	0	0	1	2	0	0.800514	0	#VALUE!
Q9HBH1	PDF	0	1	0	0	0	0	2	2	1	-1.58496	0.427243	-2.32193	1.32403
Q9Y2T2	AP3M1	3	2	2	0	0	0	0	0	0	1.22239	2.65916	1.22239	2.65916
tr|A0A024RBT2|A0A024RBT2_HUMAN	DIABLO	0	2	3	0	0	0	0	1	0	0.736966	0.880157	2.32193	0.637895
Q9NP92	MRPS30	0	0	0	0	0	0	3	3	2	#NUM!	#NUM!	#NUM!	2.87811
tr|C9JFV4|C9JFV4_HUMAN	PELP1	1	3	3	0	0	0	0	0	0	1.22239	1.60387	1.22239	1.60387
Q9Y6G3 (+1)	MRPL42	0	0	0	2	2	2	0	0	0	#NUM!	#NUM!	#NUM!	#NUM!
Q8TF74	WIPF2	0	0	0	2	3	1	0	0	0	#NUM!	1.58971	#NUM!	#NUM!
O75157	TSC22D2	0	0	0	2	2	2	0	0	0	#NUM!	#NUM!	#NUM!	#NUM!
Q8TAE8	GADD45GIP1	0	0	0	1	2	3	0	0	0	#NUM!	1.58971	#NUM!	#NUM!
Q13643	FHL3	0	0	0	3	0	1	0	0	0	#NUM!	0.688022	#NUM!	#NUM!
Q6WKZ4	RAB11FIP1	0	0	0	1	1	2	0	0	0	#NUM!	1.79237	#NUM!	#NUM!
P35573	AGL	0	0	0	0	0	0	0	0	2	#NUM!	#NUM!	#NUM!	0.427243
Q8TB72	PUM2	2	1	3	0	0	0	0	0	0	1	1.58971	1	1.58971
P15291	B4GALT1	2	1	1	0	0	0	1	1	1	0.415037	1.79237	0.415037	0.427243
O00299	CLIC1	1	1	2	0	0	0	1	1	1	0.415037	1.79237	0.415037	0.427243
Q99523	SORT1	2	1	1	0	0	0	1	1	1	0.415037	1.79237	0.415037	0.427243
tr|H0YC42|H0YC42_HUMAN	1	1	1	2	0	0	0	1	1	0	0.415037	1.79237	1	0.637895
tr|M0R2P6|M0R2P6_HUMAN	SHKBP1	0	1	2	0	0	0	1	1	1	0	0.800514	0	#VALUE!
tr|A0A1B0GWA2|A0A1B0GWA2_HUMAN (+2)	AGPS	2	2	1	0	0	0	1	1	0	0.736966	2.12552	1.32193	0.994854
tr|K7EMM8|K7EMM8_HUMAN	GLYR1	1	1	2	0	0	0	0	2	1	0.415037	1.79237	0.415037	0.191566
tr|Q5VVL7|Q5VVL7_HUMAN	DBT	2	2	1	0	0	0	0	1	1	0.736966	2.12552	1.32193	0.994854
Q96JM3	CHAMP1	2	1	1	0	0	1	0	1	0	2	0.994854	2	0.994854
Q12849	GRSF1	0	1	1	0	0	0	2	1	2	-0.584963	0.935104	-1.32193	0.994854
tr|K7EP16|K7EP16_HUMAN	EIF3G	2	2	1	0	0	0	0	1	1	0.736966	2.12552	1.32193	0.994854
Q9Y6I3	EPN1	3	1	0	0	1	1	0	1	0	1	0.285235	2	0.457622
tr|A0A8C8MSB2|A0A8C8MSB2_HUMAN	PDHX	2	1	0	0	0	0	1	0	0	0	0.800514	1.58496	0.427243
Q96CS3	FAF2	3	1	1	0	0	0	0	1	1	0.736966	1.17544	1.32193	0.600646
P52815	MRPL12	0	0	1	2	0	0	1	0	0	-1	0.168854	0	#VALUE!
tr|Q5RIP0|Q5RIP0_HUMAN (+1)	HLA-C	2	0	2	0	0	0	1	2	0	0.415037	0.935104	0.415037	0.139866
O95202	LETM1	1	1	1	0	0	0	0	0	2	0	#NUM!	0.584963	0.191566
Q9NR50	EIF2B3	0	1	2	0	0	0	0	1	1	0	0.800514	0.584963	0.191566
P55735	SEC13	3	1	2	0	0	0	0	1	0	1	1.58971	2.58496	1.17544
Q9HCD5	NCOA5	3	1	0	0	0	0	2	1	0	0.415037	0.688022	0.415037	0.11484
tr|G3V1C3|G3V1C3_HUMAN	API5	2	0	2	0	0	0	1	0	0	0.415037	0.935104	2	0.600646
P62917	RPL8	1	2	2	0	0	0	1	0	0	0.736966	2.12552	2.32193	1.32403
O75489	NDUFS3	2	1	0	0	0	0	1	0	2	0	0.800514	0	#VALUE!
O60271 (+1)	SPAG9	1	1	3	0	0	0	1	0	0	0.736966	1.17544	2.32193	0.829304
Q00765	REEP5	2	2	0	0	0	0	0	0	1	0.415037	0.935104	2	0.600646
tr|A0A669KB89|A0A669KB89_HUMAN	SCRIB	0	0	2	0	0	0	0	0	0	-0.584963	0.427243	-0.584963	0.427243
O00267	SUPT5H	2	3	2	0	0	0	0	0	0	1.22239	2.65916	1.22239	2.65916
tr|I3L0H8|I3L0H8_HUMAN	DDX19A	1	2	3	0	0	0	0	0	0	1	1.58971	1	1.58971
tr|A0A494BZV2|A0A494BZV2_HUMAN	MPRIP	0	0	0	1	2	2	0	0	0	#NUM!	2.12552	#NUM!	#NUM!
Q96M27	PRRC1	1	4	1	0	0	0	0	0	0	1	0.935104	1	0.935104
tr|A0A494C1J1|A0A494C1J1_HUMAN	SPECC1L	0	0	0	1	2	3	0	0	0	#NUM!	1.58971	#NUM!	#NUM!
Q96TA1	NIBAN2	2	1	2	0	0	0	0	0	0	0.736966	2.12552	0.736966	2.12552
Q9UPN4 (+1)	CEP131	0	0	0	0	2	2	0	0	0	#NUM!	0.935104	#NUM!	#NUM!
P59998 (+2)	ARPC4	1	1	2	0	0	0	0	1	1	0.415037	1.79237	1	0.637895
P98179	RBM3	1	0	0	2	1	0	1	0	1	-1.58496	0.427243	-1	0.285235
Q9NS69	TOMM22	1	1	1	0	0	0	0	2	1	0	#NUM!	0	#VALUE!
tr|D6RGZ2|D6RGZ2_HUMAN	THOC3	1	1	0	0	0	0	2	1	1	-0.584963	0.935104	-1	0.637895
Q14966	ZNF638	1	0	0	0	1	0	1	2	1	0	0	-2	0.994854
P45974	USP5	2	1	1	0	0	0	0	1	1	0.415037	1.79237	1	0.637895
O43765 (+5)	SGTA	0	1	2	0	0	0	1	1	1	0	0.800514	0	#VALUE!
Q5T1M5	FKBP15	2	1	1	0	0	0	0	1	0	0.415037	1.79237	2	0.994854
P49005 (+1)	POLD2	1	1	0	0	0	0	2	1	1	-0.584963	0.935104	-1	0.637895
tr|R4GMR5|R4GMR5_HUMAN	PSMD8	2	0	1	0	0	0	0	1	0	0	0.800514	1.58496	0.427243
P47985	UQCRFS1	1	0	0	2	1	1	0	0	0	-2	0.994854	-1.58496	0.427243
tr|A0A7I2V4Z9|A0A7I2V4Z9_HUMAN (+1)	CTSB	0	0	1	0	0	0	1	2	2	-1.58496	0.427243	-2.32193	1.32403
Q96B36	AKT1S1	0	2	0	2	1	0	0	1	0	-0.584963	0.139866	1	0.168854
Q9NZM1	MYOF	2	0	2	0	0	0	1	0	1	0.415037	0.935104	1	0.37505
Q6PCB0	VWA1	0	1	0	0	0	0	1	2	2	-1.58496	0.427243	-2.32193	1.32403
Q8WYA6 (+1)	CTNNBL1	1	1	2	0	0	0	0	0	2	0.415037	1.79237	1	0.37505
Q9HB40	SCPEP1	1	1	2	0	0	0	0	0	1	0.415037	1.79237	2	0.994854
Q9Y6W5	WASF2	1	1	0	0	0	0	1	2	0	-0.584963	0.935104	-0.584963	0.191566
P37802 (+1)	TAGLN2	1	2	1	0	0	0	0	1	0	0.415037	1.79237	2	0.994854
P20742	PZP	0	1	0	1	2	1	0	0	0	-2	0.994854	-1.58496	0.427243
tr|A0A096LP25|A0A096LP25_HUMAN	AAK1	2	1	2	1	0	0	0	0	0	2.32193	1.32403	0.736966	2.12552
Q15417	CNN3	0	2	2	0	0	0	1	0	1	0.415037	0.935104	1	0.37505
Q92908	GATA6	0	0	1	0	0	0	1	1	3	-1.58496	0.427243	-2.32193	0.829304
O43324 (+2)	EEF1E1	1	1	2	0	0	0	1	0	0	0.415037	1.79237	2	0.994854
tr|H3BND8|H3BND8_HUMAN	USP7	1	2	1	0	0	0	1	0	0	0.415037	1.79237	2	0.994854
P09622 (+1)	DLD	0	2	0	0	0	0	1	0	1	-0.584963	0.427243	0	#VALUE!
O00505	KPNA3	1	2	1	0	0	0	0	0	1	0.415037	1.79237	2	0.994854
tr|H3BNC9|H3BNC9_HUMAN	H3BNC9	1	0	0	0	0	0	0	2	2	-1.58496	0.427243	-2	0.600646
tr|A0A6Q8PHH9|A0A6Q8PHH9_HUMAN	GARS1	1	0	0	0	0	0	0	1	2	-1.58496	0.427243	-1.58496	0.427243
O94905 (+1)	ERLIN2	2	2	1	0	0	0	0	0	0	0.736966	2.12552	0.736966	2.12552
O95373	IPO7	2	2	1	0	0	0	0	0	0	0.736966	2.12552	0.736966	2.12552
O00429	DNM1L	2	2	2	0	0	0	0	0	0	1	#NUM!	1	#NUM!
P02788 (+1)	LTF	0	0	0	2	2	2	0	0	0	#NUM!	#NUM!	#NUM!	#NUM!
Q14137	BOP1	0	0	0	0	2	0	0	2	2	#NUM!	0.427243	#NUM!	0.935104
tr|C9JJV1|C9JJV1_HUMAN	TSSC4	0	0	0	2	2	2	0	0	0	#NUM!	#NUM!	#NUM!	#NUM!
Q9Y3B9	RRP15	0	0	0	1	2	2	0	0	0	#NUM!	2.12552	#NUM!	#NUM!
O43172	PRPF4	0	0	1	0	0	0	2	0	2	-1.58496	0.427243	-2	0.600646
tr|A0A494C1E9|A0A494C1E9_HUMAN	NFKB1	2	1	2	0	0	0	0	0	0	0.736966	2.12552	0.736966	2.12552
Q5VUA4	ZNF318	0	0	0	1	2	1	0	0	0	#NUM!	1.79237	#NUM!	#NUM!
P51858	HDGF	0	0	0	2	1	2	0	0	0	#NUM!	2.12552	#NUM!	#NUM!
Q16204	CCDC6	2	2	0	0	0	0	1	0	0	0.415037	0.935104	2	0.600646
P46531 (+2)	NOTCH1	1	0	0	0	1	3	0	0	0	-2	0.457622	-1.58496	0.427243
O43615	TIMM44	1	0	3	0	0	0	0	0	1	0.415037	0.688022	2	0.457622
P62753	RPS6	0	2	2	0	0	0	1	0	0	0.415037	0.935104	2	0.600646
Q9Y399	MRPS2	1	0	0	0	0	0	0	3	1	-1.58496	0.427243	-2	0.457622
P29590	PML	0	1	0	0	0	0	0	1	2	-1.58496	0.427243	-1.58496	0.427243
tr|E7ET15|E7ET15_HUMAN	U2SURP	0	2	3	0	0	0	0	0	0	0.736966	0.880157	0.736966	0.880157
Q96IF1	AJUBA	0	0	1	0	0	0	0	2	0	-1.58496	0.427243	-1	0.168854
O43237	DYNC1LI2	3	0	0	0	0	0	0	0	0	0	0.427243	0	0.427243
Q9P266	JCAD	0	0	0	2	1	1	0	1	0	#NUM!	1.79237	#NUM!	0.427243
Q96PV6 (+2)	LENG8	0	1	0	1	2	1	0	0	0	-2	0.994854	-1.58496	0.427243
tr|A0A7I2V4E4|A0A7I2V4E4_HUMAN	EIF4H	0	0	0	2	1	1	1	0	0	#NUM!	1.79237	#NUM!	0.427243
tr|A0A286YFD6|A0A286YFD6_HUMAN	RRM2	2	1	1	0	0	0	0	0	1	0.415037	1.79237	2	0.994854
Q14318	FKBP8	1	1	2	0	0	0	0	0	1	0.415037	1.79237	2	0.994854
tr|B4DEM9|B4DEM9_HUMAN	POLDIP2	0	0	1	0	0	0	2	1	1	-1.58496	0.427243	-2	0.994854
tr|A0A3B3IU42|A0A3B3IU42_HUMAN (+2)	GEMIN2	2	1	1	0	0	0	0	0	1	0.415037	1.79237	2	0.994854
Q9NYP9	MIS18A	2	1	0	0	0	0	0	1	1	0	0.800514	0.584963	0.191566
tr|C9JFE4|C9JFE4_HUMAN	GPS1	2	1	1	0	0	0	1	0	0	0.415037	1.79237	2	0.994854
Q92520	FAM3C	1	1	1	0	0	0	0	0	2	0	#NUM!	0.584963	0.191566
Q15102 (+1)	PAFAH1B3	1	2	0	0	0	0	0	1	1	0	0.800514	0.584963	0.191566
Q9UHB9	SRP68	1	2	1	0	0	0	0	1	0	0.415037	1.79237	2	0.994854
tr|C9JDE9|C9JDE9_HUMAN	ACAA1	0	1	0	0	0	0	1	1	2	-1.58496	0.427243	-2	0.994854
Q5VTR2	RNF20	2	1	1	0	0	0	0	0	1	0.415037	1.79237	2	0.994854
tr|A0A0G2JLD8|A0A0G2JLD8_HUMAN (+1)	SSBP1	1	2	0	0	0	0	1	0	1	0	0.800514	0.584963	0.191566
P26639	TARS	1	1	2	0	0	0	0	0	0	0.415037	1.79237	0.415037	1.79237
tr|G3V4F7|G3V4F7_HUMAN	SRP54	0	2	1	0	0	0	0	0	1	0	0.800514	1.58496	0.427243
tr|H0Y512|H0Y512_HUMAN	APMAP	0	1	1	0	0	0	2	0	0	-0.584963	0.935104	0	#VALUE!
Q86V48	LUZP1	0	0	0	2	2	1	0	0	0	#NUM!	2.12552	#NUM!	#NUM!
P23786 (+2)	CPT2	2	0	2	0	0	0	0	0	1	0.415037	0.935104	2	0.600646
P35244	RPA3	2	2	1	0	0	0	0	0	0	0.736966	2.12552	0.736966	2.12552
Q5SRE5	NUP188	2	1	2	0	0	0	0	0	0	0.736966	2.12552	0.736966	2.12552
tr|F8VRS8|F8VRS8_HUMAN (+1)	CNOT2	2	1	2	0	0	0	0	0	0	0.736966	2.12552	0.736966	2.12552
Q96B49	TOMM6	1	1	0	0	0	0	0	0	2	-0.584963	0.935104	0	#VALUE!
O15143	ARPC1B	1	0	0	0	0	0	0	2	2	-1.58496	0.427243	-2	0.600646
Q9Y5L0 (+1)	TNPO3	1	3	1	0	0	0	0	0	0	0.736966	1.17544	0.736966	1.17544
tr|E9PF18|E9PF18_HUMAN	HADH	0	0	0	0	0	0	1	0	2	#NUM!	#NUM!	#NUM!	0.800514
Q92621	NUP205	2	0	1	0	0	0	0	0	0	0	0.800514	0	0.800514
Q9UBB4	ATXN10	1	0	2	0	0	0	0	0	0	0	0.800514	0	0.800514
tr|I3L4V5|I3L4V5_HUMAN	BRD7	0	0	0	0	3	2	0	0	0	#NUM!	0.880157	#NUM!	#NUM!
Q96K17	BTF3L4	0	0	0	0	2	1	0	0	0	#NUM!	0.800514	#NUM!	#NUM!
tr|Q7Z3Z5|Q7Z3Z5_HUMAN	MED12	0	0	0	1	1	2	0	0	0	#NUM!	1.79237	#NUM!	#NUM!
Q92844	TANK	0	0	0	2	1	1	0	0	0	#NUM!	1.79237	#NUM!	#NUM!
tr|F5H6P9|F5H6P9_HUMAN	PHC1	2	0	0	1	0	1	0	0	0	0	0	-0.584963	0.427243
Q9P2D1	CHD7	0	0	0	1	1	2	0	0	0	#NUM!	1.79237	#NUM!	#NUM!
Q9HD26 (+1)	GOPC	2	1	1	0	0	0	0	0	0	0.415037	1.79237	0.415037	1.79237
tr|E5RGR0|E5RGR0_HUMAN	LYPLA1	0	0	0	0	0	0	1	2	1	#NUM!	#NUM!	#NUM!	1.79237
tr|H7C1E4|H7C1E4_HUMAN	AP1S1	2	0	1	0	0	0	0	0	1	0	0.800514	1.58496	0.427243
tr|H0Y9X3|H0Y9X3_HUMAN	PDCD6	0	1	2	0	0	0	0	0	1	0	0.800514	1.58496	0.427243
P14859 (+3)	POU2F1	0	0	1	0	0	0	1	0	2	-1.58496	0.427243	-1.58496	0.427243
O43251 (+5)	RBFOX2	0	0	0	0	0	0	1	1	2	#NUM!	#NUM!	#NUM!	1.79237
Q9Y5J9	TIMM8B	0	0	0	0	0	0	1	1	2	#NUM!	#NUM!	#NUM!	1.79237
Q9NPH2	ISYNA1	1	2	1	0	0	0	0	0	0	0.415037	1.79237	0.415037	1.79237
tr|A0A087WY03|A0A087WY03_HUMAN (+1)	SREK1	1	0	1	0	0	0	0	0	2	-0.584963	0.935104	0	#VALUE!
tr|B4DIH5|B4DIH5_HUMAN	COPS2	1	1	2	0	0	0	0	0	0	0.415037	1.79237	0.415037	1.79237
P11234	RALB	2	0	1	0	0	0	0	1	0	0	0.800514	1.58496	0.427243
P30837	ALDH1B1	0	1	0	0	0	0	2	0	1	-1.58496	0.427243	-1.58496	0.427243
O95573 (+3)	ACSL3	1	1	2	0	0	0	0	0	0	0.415037	1.79237	0.415037	1.79237
tr|E9PIY1|E9PIY1_HUMAN	PACSIN3	0	1	0	0	0	0	0	1	2	-1.58496	0.427243	-1.58496	0.427243
tr|A0A1W2PRB8|A0A1W2PRB8_HUMAN	A0A1W2PRB8	2	0	0	0	0	0	1	1	0	-0.584963	0.427243	0	#VALUE!
O00743	PPP6C	1	1	2	0	0	0	0	0	0	0.415037	1.79237	0.415037	1.79237
tr|G5E975|G5E975_HUMAN	SMARCB1	2	1	1	0	0	0	0	0	0	0.415037	1.79237	0.415037	1.79237
tr|H0YKH0|H0YKH0_HUMAN (+1)	TLE3	2	1	1	0	0	0	0	0	0	0.415037	1.79237	0.415037	1.79237
Q15118	PDK1	2	1	0	0	0	0	0	0	0	0	0.800514	0	0.800514
Q9NPI6	DCP1A	2	1	1	0	0	0	0	0	0	0.415037	1.79237	0.415037	1.79237
Q9H9B4	SFXN1	0	0	0	0	0	0	2	1	0	#NUM!	#NUM!	#NUM!	0.800514
Q99519	NEU1	0	0	2	0	0	0	0	0	1	-0.584963	0.427243	1	0.168854
Q9H9P8	L2HGDH	0	0	2	0	0	0	0	0	1	-0.584963	0.427243	1	0.168854
Q8N7H5	PAF1	1	2	0	0	0	0	0	0	0	0	0.800514	0	0.800514
tr|A0A8C8NWT4|A0A8C8NWT4_HUMAN	PLEKHG3	0	0	0	0	2	2	0	0	0	#NUM!	0.935104	#NUM!	#NUM!
O76094	SRP72	2	0	1	0	0	0	0	0	0	0	0.800514	0	0.800514
Q15050	RRS1	0	0	0	0	2	1	0	0	0	#NUM!	0.800514	#NUM!	#NUM!
P53367	ARFIP1	1	3	0	0	0	0	0	0	0	0.415037	0.688022	0.415037	0.688022
Q13404	UBE2V1	0	0	0	0	0	0	3	0	0	#NUM!	#NUM!	#NUM!	0.427243
P78318	IGBP1	1	0	2	0	0	0	0	0	0	0	0.800514	0	0.800514
Q96ST2	IWS1	0	2	1	0	0	0	0	0	0	0	0.800514	0	0.800514
P35249	RFC4	1	0	2	0	0	0	0	0	0	0	0.800514	0	0.800514
Q13045	FLII	1	0	2	0	0	0	0	0	0	0	0.800514	0	0.800514
Q9BYD6	MRPL1	0	0	0	0	0	0	1	0	2	#NUM!	#NUM!	#NUM!	0.800514
O00629 (+2)	KPNA4	2	0	1	0	0	0	0	0	0	0	0.800514	0	0.800514
Q9UHG3	PCYOX1	0	0	2	0	0	0	0	1	0	-0.584963	0.427243	1	0.168854
O43395	PRPF3	0	0	1	2	0	0	0	0	0	-1	0.168854	-1.58496	0.427243
tr|A6NNK5|A6NNK5_HUMAN	TP53BP1	0	0	2	0	0	0	0	0	0	-0.584963	0.427243	-0.584963	0.427243
Q9NWB6	ARGLU1	0	0	0	2	0	0	0	0	0	#NUM!	0.427243	#NUM!	#NUM!
tr|B7Z6J7|B7Z6J7_HUMAN	CNOT3	0	0	3	0	0	0	0	0	0	0	0.427243	0	0.427243
O75362	ZNF217	0	0	0	0	2	0	0	0	0	#NUM!	0.427243	#NUM!	#NUM!
Q8IZ83	ALDH16A1	0	2	0	0	0	0	0	0	0	-0.584963	0.427243	-0.584963	0.427243
tr|G3V0I5|G3V0I5_HUMAN	NDUFV1	0	0	0	0	0	0	0	0	2	#NUM!	#NUM!	#NUM!	0.427243
tr|F8VUB0|F8VUB0_HUMAN (+1)	SMARCD1	2	0	0	0	0	0	0	0	0	-0.584963	0.427243	-0.584963	0.427243
tr|F8VV47|F8VV47_HUMAN (+8)	RACGAP1	0	0	2	0	0	0	0	0	0	-0.584963	0.427243	-0.584963	0.427243
P60900 (+3)	PSMA6	0	0	2	0	0	0	0	0	0	-0.584963	0.427243	-0.584963	0.427243

## Sheet: CHIKV-MFP
Accession Number	Alternate ID	CHIKV-MFP abundance values			Mock infection total spectrum counts			CHIKV infected total spectrum counts			log2 (FC/Mock)	negative log10 pvalue (FC/Mock)	log2 (FC/CHIKV)	negative log10 pvalue (FC/CHIKV)
Q15149	PLEC	4.37207e+08	2.68684e+08	2.11094e+08	6.91862e+07	6.52896e+07	4.36452e+07	7.62235e+07	8.03167e+07	8.49376e+07	2.36404	1.6466	1.92501	1.53216
P08670	VIM	7.23678e+08	2.65133e+08	2.05245e+08	2.70022e+08	2.44626e+08	1.36094e+08	1.65151e+08	1.70753e+08	2.36845e+08	0.875714	0.462823	1.05989	0.553973
A0A087X0X3	HNRNPM	3.20637e+08	1.21522e+08	1.32311e+08	8.50215e+07	7.0828e+07	3.99288e+07	3.65828e+07	2.77093e+07	3.69169e+07	1.55301	0.891658	2.5049	1.14613
P35579	MYH9	6.51874e+07	3.41086e+07	2.08469e+07	1.01411e+07	5.64862e+06	5.61418e+06	1.43243e+07	1.11114e+07	1.86179e+07	2.4888	1.17013	1.44742	0.887429
P25705	ATP5F1A	1.69457e+08	2.935e+07	3.14484e+07	1.46016e+08	1.14679e+08	1.0011e+08	5.12957e+07	5.25631e+07	6.54453e+07	-0.647985	0.381859	0.443619	0.1634
P07437	TUBB	3.61814e+08	2.32581e+08	1.81101e+08	1.2482e+08	1.04455e+08	9.91868e+07	5.24909e+07	6.27776e+07	6.55649e+07	1.23939	1.28692	2.10046	1.67254
P68371	TUBB4B	7.00256e+07	4.70812e+07	4.10717e+07	3.20443e+07	3.07275e+07	2.09555e+07	1.01495e+07	1.30236e+07	1.42216e+07	0.917784	1.22838	2.08065	1.97281
P21333	FLNA	4.91468e+07	2.10462e+07	2.35333e+07	1.3964e+07	1.46292e+07	5.46066e+06	1.31711e+07	1.04545e+07	8.58336e+06	1.46063	0.986392	1.54099	1.06137
P48681	NES	1.08088e+08	4.60338e+07	4.17176e+07	4.45061e+07	4.2736e+07	3.35379e+07	2.13589e+07	2.2925e+07	2.89704e+07	0.69729	0.504153	1.41868	0.88324
P60709	ACTB	1.818e+08	1.24652e+08	1.44113e+08	3.39776e+08	4.92291e+08	2.9386e+08	4.91646e+08	5.73903e+08	3.29036e+08	-1.32131	1.65119	-1.63003	1.88306
P23246	SFPQ	2.14199e+08	6.55652e+07	6.61245e+07	1.2072e+08	9.55829e+07	7.94464e+07	2.93465e+07	3.33894e+07	4.51241e+07	0.225933	0.118575	1.68115	0.732134
Q9BVA1	TUBB2B	2.35615e+06	1.67131e+06	2.47266e+06	1.28659e+06	916607	942597	721877	504091		1.04704	1.80576	1.82158	1.7317
Q13885	TUBB2A	7.11827e+06	4.24987e+06	2.70664e+06	3.46408e+06	2.27121e+06	2.45802e+06	668093	789233	501662	0.780594	0.660417	2.84493	1.44864
F5H5D3	TUBA1C	2.88961e+08	2.52471e+08	2.1675e+08	8.95972e+07	6.56212e+07	9.75936e+07	6.22249e+07	6.25474e+07	6.2468e+07	1.58448	2.73969	2.01765	3.10182
P04350	TUBB4A		379416								#DIV/0!	#NUM!	#DIV/0!	#NUM!
P35527	KRT9	1.79228e+06	550462	437422	428398	4.67143e+06	794694	721255	1.70562e+07	1.28781e+08	-1.0842	0.295252	-5.72016	0.523389
A0A7I2V535	NONO	9.49981e+07	3.40831e+07	2.3056e+07	4.44383e+07	3.69772e+07	2.02424e+07	1.09722e+07	1.4793e+07	1.37368e+07	0.581649	0.289604	1.94538	0.772075
P04264	KRT1	6.19423e+06	5.44191e+06	1.40835e+07	3.57891e+06	1.1379e+07	9.78331e+06	2.55612e+06	6.41013e+07	2.49461e+08	0.0559495	0.0300997	-3.61952	0.58144
P38646	HSPA9	9.69412e+07	4.6838e+07	2.28621e+07	9.83357e+07	7.30721e+07	5.06929e+07	2.77115e+07	2.49157e+07	3.2155e+07	-0.414468	0.289647	0.974914	0.550912
P0DPH8	TUBA3D	1.89722e+07	1.01691e+07	7.68579e+06	4.88039e+06	5.26218e+06	3.75688e+06	1.88056e+06	3.71285e+06	3.61206e+06	1.40574	1.03933	2.0002	1.24393
M0QZM1	HNRNPM		1448791			1.42017e+06					0.0287817	#NUM!	#DIV/0!	#NUM!
P20700	LMNB1	3.35382e+07	2.08345e+07	1.57608e+07	1.97756e+07	1.82108e+07	7.72338e+06	1.4332e+07	1.4233e+07	1.78331e+07	0.6176	0.554841	0.596041	0.661549
P62736	ACTA2										#DIV/0!	#NUM!	#DIV/0!	#NUM!
Q00839	HNRNPU	6.97207e+07	3.82732e+07	3.55232e+07	1.13241e+07	9.48842e+06	6.13618e+06	1.52577e+07	1.71612e+07	1.79369e+07	2.41294	1.60729	1.51099	1.32185
Q96I24	FUBP3	8.66096e+07	3.43499e+07	3.19576e+07	4.54493e+07	3.82353e+07	2.82636e+07	9.16274e+06	9.12363e+06	1.35568e+07	0.449918	0.299558	2.26369	1.05995
Q8N3V7	SYNPO	2.34198e+07	8.66102e+06	1.70373e+07	2.27262e+07	2.47356e+07	1.02231e+07	4.91443e+06	4.2044e+06	2.92747e+06	-0.23194	0.173459	2.02766	1.34022
P11142	HSPA8	3.73096e+07	1.68404e+07	1.67303e+07	5.17016e+06	5.56772e+06	4.1232e+06	1.14065e+07	5.42843e+06	1.15457e+07	2.25385	1.27762	1.32048	0.928269
Q13509	TUBB3	1.90653e+06	1.68733e+06	1.38551e+06	744215	474386	518678		351866	208844	1.51913	2.47899	2.56567	2.19125
Q13435	SF3B2	3.24842e+07	1.48308e+07	1.79793e+07	3.26411e+07	3.15241e+07	2.91201e+07	7.17881e+06	1.57228e+07	7.41e+06	-0.514694	0.777	1.10708	0.888005
P27708	CAD	2.50351e+07	1.50234e+07	9156451	1.80079e+06	1.6871e+06	1.7188e+06	1.49825e+06	1.50466e+06	1.35694e+06	3.24066	1.46805	3.49675	1.49324
A0A087WVQ6	CLTC	3.66369e+07	2.16954e+07	2.31029e+07	2.83646e+06	1.10212e+06	2.68482e+06	6.47883e+06	7.4641e+06	6.78964e+06	3.62001	2.18609	1.97375	1.87736
Q15084	PDIA6	3.85211e+07	3.53346e+07	2.64472e+07	3.03036e+07	2.64235e+07	3.36846e+07	1.88377e+07	3.32766e+07	2.78045e+07	0.149783	0.324117	0.327756	0.540967
Q9BUF5	TUBB6	2.36751e+07	6.28676e+06	3.79494e+06	6.35545e+06	5.27483e+06	1.7891e+06	163870	185100	357617	1.33086	0.456665	5.57816	0.81559
P68366	TUBA4A	4681000	1.18279e+06	1.06041e+06							#DIV/0!	#NUM!	#DIV/0!	#NUM!
P11021	HSPA5	3.20498e+07	1.52039e+07	6.96254e+06	1.65212e+07	1.41941e+07	9.80807e+06	7.75741e+06	6.81301e+06	6.70178e+06	0.419967	0.234757	1.34975	0.674708
P49750	YLPM1	2.14947e+07	9.18211e+06	1.20949e+07	7.96599e+06	6.06432e+06	3.19052e+06	1.81342e+06	1.19616e+06	1.14618e+06	1.3125	1.00765	3.36347	1.58767
Q96PK6	RBM14	1.30887e+08	7.34131e+07	4.03677e+07	6.9392e+07	6.62566e+07	5.11009e+07	2.45173e+07	3.35208e+07	3.99115e+07	0.389718	0.288657	1.32071	0.84631
P05787	KRT8	2.70704e+07	1.07998e+07	7.90467e+06	1.91124e+07	1.52383e+07	1.05378e+07	7.94571e+06	8.74604e+06	1.10521e+07	0.028211	0.0151537	0.72239	0.425032
P10809	HSPD1	9.34964e+06	2.86054e+06	1.65773e+06	1.33186e+07	1.38952e+07	7.66257e+06	5.95155e+06	6.78996e+06	6.93543e+06	-1.3305	1.05874	-0.504755	0.331172
P00761	HSPD1	7.25231e+08	6.8678e+08	8.7422e+08	1010237222	1.15785e+09	7.99313e+08	9.58166e+08	9.98237e+08	7.49505e+08	-0.376227	0.889868	-0.243141	0.662603
P22626	HNRNPA2B1	1.80511e+07	1.05032e+07	1.84685e+07	2.79294e+07	2.26223e+07	2.46466e+07	1.97e+07	2.64023e+07	2.42917e+07	-0.67734	1.44733	-0.582093	1.12455
A8MXP9	MATR3	2.18007e+07	8.16763e+06	7.54763e+06	3.52157e+06	2.88943e+06	1.62119e+06	787371	771306	1.71571e+06	2.22364	0.983401	3.51821	1.15144
P68104	EEF1A1	1.90695e+07	1.09196e+07	1.68911e+07	2.56393e+07	1.51119e+07	7.68655e+06	9.73428e+06	9.37617e+06	1.25134e+07	-0.0471526	0.0304005	0.567968	0.902028
A0A6Q8PFJ0	LMNA	1.22414e+07	7.24148e+06	2.64166e+06	1.22408e+07	1.05854e+07	7.18134e+06	3.76572e+06	7.03588e+06	4.34817e+06	-0.439677	0.346141	0.546352	0.32366
Q96RQ3	MCCC1	1.85911e+07	6.05881e+06	3.67048e+06	1.15982e+07	1.16543e+07	7.81213e+06	4.23467e+06	3.84944e+06	5.96732e+06	-0.133428	0.0664591	1.01112	0.436173
Q8IXB1	DNAJC10	5.03986e+07	3.84989e+07	2.33682e+07	2.23566e+07	1.54315e+07	2.32447e+07	1.26014e+07	1.32305e+07	1.14197e+07	0.879261	0.975621	1.59154	1.47847
A0A7P0TAT8	HSP90B1	6.78443e+06	3.90827e+06	4.66396e+06	1.39447e+07	1.03307e+07	1.07551e+07	1.23348e+07	1.10251e+07	1.03313e+07	-1.18975	1.99516	-1.13351	2.37448
P62805	H4C1	3.79029e+07	1.44202e+07	1.87939e+07	3.95796e+07	4.59471e+07	3.56994e+07	2.7692e+07	3.2099e+07	3.34366e+07	-0.769434	1.00409	-0.390563	0.42417
P13674	P4HA1	2.27111e+07	9.35621e+06	1.02063e+07	1.50664e+06	999221	767719	602636	270332	1.06255e+06	3.69082	1.40181	4.44897	1.44538
Q9NYU2	UGGT1	8.05275e+06	2.35229e+06	4.37658e+06	7.40468e+06	5.53186e+06	4.33317e+06	3.80268e+06	2.84538e+06	1.93842e+06	-0.22444	0.165019	0.783666	0.516955
Q8WWM7	ATXN2L	2.19311e+07	1.03799e+07	1.48474e+07	9.08697e+06	8.29526e+06	2.43536e+06	9.95052e+06	1.93603e+06	1.66085e+06	1.25073	1.08093	1.7995	1.21732
Q14315	FLNC	8.85961e+06	4.14318e+06	3.42891e+06	4.94077e+06	3.92323e+06	1.19745e+06	3.18434e+06	2.45459e+06	3.68986e+06	0.707644	0.448335	0.816721	0.610018
P04792	HSPB1	7.0347e+07	3.04033e+07	3.21288e+07	6.18983e+07	5.01089e+07	3.38559e+07	2.30125e+07	2.971e+07	3.11388e+07	-0.134502	0.101198	0.664037	0.543921
Q07065	CKAP4	8.24584e+06	5.98508e+06	2.44702e+06	2.81408e+06	2.90973e+06	2.29154e+06	5.46997e+06	5.23972e+06	2.88823e+06	1.0571	0.784315	0.294556	0.212035
Q14980	NUMA1	1.29917e+07	7.13854e+06	1.89726e+06	8.4498e+06	7.51391e+06	3.14395e+06	2.85687e+06	3.29525e+06	2.77782e+06	0.205152	0.0968427	1.30258	0.610464
P08238	HSP90AB1	9.62143e+06	7.85404e+06	4.68731e+06	8.93204e+06	8.40302e+06	8.07733e+06	1.11758e+07	9.62851e+06	9.40403e+06	-0.197394	0.300495	-0.446807	0.801258
A0A7P0T9U7	SF1	3.78239e+07	1.8602e+07	9.28583e+06	2.6404e+07	2.22477e+07	1.15188e+07	7.03967e+06	9.24464e+06	6.83095e+06	0.127094	0.0678704	1.5073	0.775477
O14497	ARID1A	1.19391e+07	5.60074e+06	4.27937e+06	4.24101e+06	3.69639e+06	2.19862e+06	1.17812e+06	1.36568e+06	1.60064e+06	1.10611	0.730639	2.39635	1.17028
P46937	YAP1	19135353	3.94886e+06	950725	9.71406e+06	6.89351e+06	3.5829e+06	269387	159970	249485	0.251459	0.0763887	5.14591	0.621926
P05783	KRT18	2.4769e+07	1.39045e+07	1.03919e+07	5.98361e+06	7.27412e+06	4.01695e+06	7.84621e+06	7.68793e+06	4.79829e+06	1.50605	1.125	1.27093	1.01249
Q13268	DHRS2	1.61078e+07	5.65168e+06	1.00013e+07	1.82315e+07	1.4697e+07	1.25067e+07	5.0978e+06	6.78492e+06	7.31799e+06	-0.516565	0.588032	0.726084	0.603977
E2	CHIKV E2	9.45514e+06	4.23572e+06	8.80566e+06			84028	1.91576e+07	2.10877e+07	1.02175e+07	6.47965	0.816559	-1.16552	1.17524
Q9HCC0	MCCC2	8.17998e+06	2.18242e+06	1.17624e+06	5.59994e+06	3.78678e+06	3.4005e+06	1.09882e+06	275121	711873	-0.148229	0.0632029	2.46779	0.647432
J3KTA4	DDX5	1.9486e+07	8.92745e+06	7.09222e+06	4.83284e+06	3.64008e+06	3.5506e+06	1.70857e+06	2.14239e+06	2.04652e+06	1.56219	0.942692	2.58988	1.20045
Q9BPW8	NIPSNAP1	4.61561e+07	1.50804e+07	2.04044e+07	51759858	4.24838e+07	3.37691e+07	1.12277e+07	1.64246e+07	1.59168e+07	-0.648923	0.639166	0.905983	0.581033
O95678	KRT75	1.36687e+07	7.4134e+06	4.48014e+06	3.3705e+06	4.61887e+06	1.31471e+06	1.65351e+06	693644		1.45808	0.877476	2.86006	0.893292
Q9Y618	NCOR2	1.09262e+07	8.26114e+06	6.58002e+06	6.1241e+06	3.85079e+06	2.19898e+06	730778	1.81484e+06	755975	1.08176	1.25006	2.96431	2.32836
Q04695	KRT17	1.56643e+07	5.24319e+06	5.11587e+06	1.01066e+07	6.64334e+06	5.58192e+06	2.91679e+06	2.76239e+06	2.76231e+06	0.220703	0.119512	1.62424	0.772311
Q9UMS4	PRPF19	2.26877e+07	6.50374e+06	5.34702e+06	8.42749e+06	6.45464e+06	5.56565e+06	3.42697e+06	4.11856e+06	4.2218e+06	0.756258	0.343564	1.55341	0.607349
Q13263	TRIM28	6.95353e+06	2.01087e+06	460499	914686	259999	244070	414774	731046	717501	2.73185	0.607257	2.3386	0.571948
G3V1L9	TJP1	7.78029e+06	4.5908e+06	2.89698e+06	3.27496e+06	2.30967e+06	1.70975e+06	1.07208e+06	1.45095e+06	1.54666e+06	1.06566	0.819301	1.90752	1.21887
P11498	PC	1.41496e+07	7.2513e+06	5.34206e+06	7.96024e+06	5.94411e+06	3.91023e+06	2.47342e+06	2.49236e+06	3.16583e+06	0.586102	0.436953	1.71755	1.08639
Q3ZCM7	TUBB8	975999			407499	214081					1.65094	0.803987	#DIV/0!	#NUM!
Q9HBD4	SMARCA4	6.5265e+06	2.69447e+06	4.51895e+06	272590	401939	179367	253453	273762	206961	4.00817	1.74669	4.2261	1.76213
P23527	H2BC17	4.98705e+06	750315	1.06835e+06	4.53796e+06	2.8983e+06	750260	3.52669e+06	1.028e+06	1.12527e+06	-0.266504	0.0939792	0.260867	0.0836145
A0A7P0TA71	P4HB	8.46789e+06	3.68769e+06	4.92763e+06	6.46936e+06	4.20462e+06	4.13548e+06	3.15864e+06	2.89225e+06	2.95785e+06	0.206059	0.177114	0.923182	0.873395
P33993	MCM7	1.06466e+07	5.92854e+06	3.52001e+06	2.05132e+06	2.59141e+06	1.41696e+06	2.07926e+06	2.43991e+06	2.81058e+06	1.72953	1.0363	1.45501	0.946399
Q9NZB2	FAM120A	9.34782e+06	5.82615e+06	6.75766e+06	4.26494e+06	4.10388e+06	2.88956e+06	2.60221e+06	2.35643e+06	2.58857e+06	0.962014	1.45041	1.539	1.97831
P55084	HADHB	1.01644e+07	1.81946e+06	2.13026e+06	2.35946e+06	1.60075e+06	472650	951071	1.5059e+06	427793	1.67083	0.507036	2.29062	0.6109
Q12797	ASPH	3.44378e+06	1976454	1.91835e+06	1.04184e+06	899791	2.02075e+06	1.39204e+06	1.03882e+06	1.29544e+06	0.889132	0.856174	0.977759	1.11007
Q9H307	PNN	1.21817e+07	4.62766e+06	1.79264e+06	9.24444e+06	5.61808e+06	1.30892e+06	2.11405e+06	2.70288e+06	3.87498e+06	0.202007	0.0737208	1.09771	0.452714
Q99459	CDC5L	9.91675e+06	1.10365e+06	1.38308e+06	491913	761671	211776	811169	202659	1.00164e+06	3.08142	0.558175	2.62156	0.524673
O60814	H2BC12	5.13875e+07	2.02267e+07	1.91503e+07	3.66133e+07	3.29734e+07	3.20422e+07	3.11025e+07	2.6856e+07	3.37611e+07	-0.163111	0.12424	-0.0151029	0.00974419
P49792	RANBP2	6.29325e+06	3.6957e+06	2.226e+06	910561	748100	542947	296962	201847	495802	2.47202	1.30966	3.61837	1.45661
P22087	FBL	1.71285e+07	7.09278e+06	9.81286e+06	7.22026e+06	8.51954e+06	5.26133e+06	3.83354e+06	3.57128e+06	4.42036e+06	0.696517	0.621548	1.52512	1.15768
P51659	HSD17B4	6.55134e+06	3.93505e+06	1.64139e+06	2.5351e+06	1.87703e+06	1.13199e+06	772677	2.7835e+06	1.01258e+06	1.12929	0.675602	1.40844	0.744301
P06899	H2BC11										#DIV/0!	#NUM!	#DIV/0!	#NUM!
P02769	ALB	7.21884e+06	4.31016e+06	2.21545e+06	1.04249e+07	9.48472e+06	6.58929e+06	1.06703e+07	8.49373e+06	1.07752e+07	-0.947085	1.07805	-1.12319	1.52849
Q562R1	ACTBL2										#DIV/0!	#NUM!	#DIV/0!	#NUM!
Q9H0D6	XRN2	1.18641e+07	4.2705e+06	6.85923e+06	4.93606e+06	4.91447e+06	2.04019e+06	1.88138e+06	4.11071e+06	3.78605e+06	0.951411	0.694601	1.23362	0.87866
Q9UGU0	TCF20	3.12006e+06	1.0322e+06	1.33478e+06	1.32517e+06	1.49103e+06	351508				0.79259	0.448166	#DIV/0!	#NUM!
O43823	AKAP8	1.17413e+07	5.26582e+06	10751504	2.6447e+06	1.94663e+06	2.10325e+06	274924	413680	404199	2.05187	1.59101	4.66683	1.93637
P14618	PKM	3.59819e+06	1.53655e+06	1.05236e+06	8.62855e+06	7.52293e+06	5.64028e+06	884533	932638	1.14112e+06	-1.81645	1.94688	1.0645	0.616188
Q9Y230	RUVBL2	9.57467e+06	3.24799e+06	2.73496e+06	3.45746e+06	1.93566e+06	1.21965e+06	1.17167e+06	1.53331e+06	1.08972e+06	1.2343	0.578524	2.03556	0.824491
Q9P2E9	RRBP1	2.17537e+06	2.35399e+06	667625	508184	730294	716208	431979	593274	34268.6	1.41074	0.936468	2.29426	1.15802
P11940	PABPC1	9.39014e+06	2.70508e+06	818103	6.27802e+06	4.96505e+06	2.2291e+06	2.92053e+06	3.34468e+06	2.81223e+06	-0.0611219	0.021724	0.508502	0.187536
Q9Y520	PRRC2C	6.67487e+06	4742923		1.84691e+06	1.007e+06					2.00027	1.25555	#DIV/0!	#NUM!
H0YFD6	HADHA	4.77199e+06	2.55699e+06	3.68111e+06	3.47343e+06	1.95716e+06	1.86743e+06	2.16786e+06	2.40288e+06	1.1954e+06	0.593251	0.682008	0.933148	1.11296
P48634	PRRC2A	8.1912e+06	3.58151e+06	2.85242e+06	4.17256e+06	2.90947e+06	2.12842e+06	1.02248e+06	593907	767490	0.667106	0.435849	2.61707	1.14494
Q86UP2	KTN1	4.0298e+06	1.47144e+06	4.65698e+06	989783	672989		1.29706e+06	829178	396446	2.02602	0.865288	2.00962	1.18655
P35658	NUP214	9.2256e+06	4.74137e+06	2.53463e+06	6.17402e+06	5.77152e+06	844616	1.44518e+06	1.57728e+06	4.05524e+06	0.367572	0.180343	1.22125	0.664161
Q8WUF5	PPP1R13L	8.14346e+06	4.30434e+06	926090	1.68055e+06	2.09202e+06	1.39965e+06	1.76198e+06	224885	3.43602e+06	1.37056	0.581979	1.30229	0.50861
NSP2	CHIKV NSP2	8.88232e+06	3.29799e+06	3.13433e+06	91507.5			3.77235e+06	3.51364e+06	2.79316e+06	5.80184	0.500589	0.603537	0.38406
Q9Y265	RUVBL1	1.04389e+07	3.13296e+06	4.33454e+06	3.52002e+06	3.30822e+06	1143070	1.23446e+06	890031	2.56649e+06	1.16759	0.624446	1.93252	0.885112
A0A2R8Y5A6	ATXN2	1.94789e+06	802963	463321	312907	207089	194884				2.16868	0.859489	#DIV/0!	#NUM!
A0A0G2JIW1	HSPA1B	1.80948e+06	1.3415e+06	200046	294668	363875	135698	290941	290568	607461	2.07695	0.817503	1.49489	0.667729
P07910	HNRNPC	3.12614e+06	1.75325e+06	947983	3.65241e+06	3.79598e+06	2.78515e+06	5.39794e+06	6.21767e+06	5.38898e+06	-0.812387	0.969097	-1.545	2.2386
O43464	HTRA2	2.87547e+06	1.2062e+06	874561	4.12531e+06	4.88096e+06	3.396e+06	608116	640746	930702	-1.32329	1.52216	1.1852	0.669008
A0A0C4DGG9	CHD4	7.57868e+06	5.65265e+06	2.58301e+06	683194	341633		734015	837505	967555	3.36282	1.06779	2.63886	1.41509
O75369	FLNB	2.39746e+06	832057	260113	732628	607912	437898	406770	175863	452265	0.972463	0.370439	1.75359	0.563691
O43491	EPB41L2	6.70783e+06	3.42277e+06	3.47705e+06	1.46976e+06	1.58938e+06	551782	1.12636e+06	1.11675e+06	1.14505e+06	1.91398	1.37157	2.00584	1.45632
P35908	KRT2									5981114	#DIV/0!	#NUM!	#DIV/0!	#NUM!
Q6Y7W6	GIGYF2	4.48927e+06	1.80274e+06	727255	1.9863e+06	1.32072e+06	1.81015e+06	127643	397181	255858	0.455975	0.217094	3.16851	0.862364
P36542	ATP5F1C	1.06069e+06	162001	254018	9.17079e+06	7.14721e+06	4.67956e+06		173855	607800	-3.82977	2.09259	0.332819	0.0875988
E9PMS6	LMO7	2.56837e+06	1.08414e+06	955866	968439	1.83316e+06	740177	186316	285289	485278	0.379784	0.225968	2.26784	1.0903
P50454	SERPINH1	1.22606e+07	4.43554e+06	3.84446e+06	8.21982e+06	7.13484e+06	6.19819e+06	6.25938e+06	7.20628e+06	7.331e+06	-0.0694038	0.0414065	-0.0178772	0.0102926
Q9Y490	TLN1	4.69487e+06	2.41157e+06	683537		615293		637522	748009	1.00015e+06	2.07731	0.315516	1.70722	0.704587
Q03252	LMNB2	4.98691e+06	1.6733e+06	918562	2.61156e+06	1.44612e+06		1.72583e+06	1.6121e+06	2.33607e+06	0.316347	0.104957	0.417599	0.191622
Q14697	GANAB	1.6899e+06	1.24039e+06		4.75222e+06	3.30509e+06	2.14465e+06	1.63073e+06	1.96978e+06	2.1935e+06	-1.21477	0.83862	-0.398552	0.739504
J3QK89	CHERP	9.85015e+06	5.72302e+06	624939	4.67767e+06	4.62877e+06	1.81341e+06	755977	1705895	829940	0.542687	0.23501	2.29887	0.734227
E9PRY8	EEF1D	1.31455e+06	656345		2.53859e+06	2.04007e+06	2.6928e+06	1.6934e+06	1.41904e+06	1419894	-1.29843	1.57276	-0.616442	0.826444
P30876	POLR2B	1223630	578641	317184	1.4113e+06	931052	559046	167667		173330	-0.453053	0.28828	2.0509	0.655796
A0A7I2V4G0	HNRNPA3				1.28311e+06	4.15628e+06		886069			#DIV/0!	#NUM!	#DIV/0!	#NUM!
Q14444	CAPRIN1	5.80059e+06	2.61635e+06	5.51524e+06	4.30779e+06	3.26336e+06	2.02253e+06	1.08032e+06	287871	1184700	0.538263	0.524316	2.44822	1.63992
Q15424	SAFB	5.14199e+06	2.33421e+06	1.64363e+06	5.19688e+06	3.96216e+06	2.05034e+06	2.61896e+06	1.17076e+06	1.31226e+06	-0.297626	0.18927	0.837952	0.502635
P31942	HNRNPH3	3.88576e+06	1.83718e+06	2.4144e+06	7.36551e+06	3.80651e+06	3.29017e+06	1.3786e+06	2.03795e+06	2.11673e+06	-0.829659	0.67471	0.556422	0.594077
P18583	SON	5.76315e+06	1.8742e+06	689034	2.24206e+06	1.30345e+06	199358	82755.7		833063	1.15277	0.392484	2.59959	0.481447
P07900	HSP90AA1	728144	704385	969626	971714	552875	1.18057e+06	827307	846253	749193	-0.171383	0.190421	-0.0123181	0.0256182
P46783	RPS10	503487	139253		9.78671e+06	7.86432e+06	4.60597e+06	2.5765e+06	2.11467e+06	1.98826e+06	-4.52892	1.44294	-2.79245	2.24314
Q9BSJ8	ESYT1	3.20453e+06	1.19654e+06		370988	102694	279708	615863	796015	553268	3.13135	1.08783	1.74818	0.876567
P55265	ADAR	2.97965e+06	595922	8.58628e+06	682998	389190		88667.3	258222		2.91877	0.476822	4.54678	0.531676
Q14137	BOP1	1.35464e+06	476099	738001	5.42743e+06	4.33886e+06	3.90294e+06	583672	550364	1.17527e+06	-2.4118	2.67716	0.153604	0.0934931
Q9HAU0	PLEKHA5	3.8198e+06	2.12014e+06	2.38282e+06	848413	535923	634023	635158	218602	412664	2.04388	1.76286	2.7163	1.91225
A0A669KB89	SCRIB	2.18754e+06	2.97819e+06	2.5111e+06	309419	238737	494040	2.68881e+06	2.36001e+06	1.73389e+06	2.88088	3.10073	0.178647	0.340374
Q07666	KHDRBS1	1.07011e+07	6.60309e+06	2.19771e+06	2.35483e+06	2.34924e+06	2.01442e+06	2.92133e+06	3.21337e+06	720714	1.53741	0.801348	1.5083	0.751095
P05141	SLC25A5	3.73757e+06	3.494e+06	1.04576e+06	754354	642441		2.17005e+06	2.78933e+06	2.08749e+06	1.98208	0.794495	0.232184	0.175198
Q14152	EIF3A	3.68742e+06	2.23233e+06	1.55338e+06	197742	175066	139139	361132	24606	343794	3.86764	1.67543	3.35667	1.61103
P61978	HNRNPK	2.15825e+06	1.68119e+06	887144	994721	1.04209e+06	630967		139052	172448	0.825156	0.808138	3.33853	1.22709
Q9NR30	DDX21	7.01537e+06	3.16539e+06	2.92402e+06	607971	457761		647821	800567	912646	3.03521	0.954955	2.4726	1.26573
P06576	ATP5F1B	163124			2.23635e+06	2.24752e+06	1.72512e+06		407195	97461.5	-3.66536	1.50651	-0.629334	0.0992992
Q13085	ACACA	2.06225e+06	1.43533e+06	2.53987e+06							#DIV/0!	#NUM!	#DIV/0!	#NUM!
G3V3A4	SNW1	154431	111601		2.95481e+06	2.28875e+06	1003787				-3.96861	1.10857	#DIV/0!	#NUM!
NSP3	CHIKV NSP3	9.72115e+06	2.1693e+06	3.21226e+06				515359	885668	730250	#DIV/0!	#NUM!	2.82502	0.849136
E7EUI6	ITGB1	2.46802e+06	2.87317e+06	2.52467e+06	3.72678e+06	3.00928e+06	2.04166e+06	1.65375e+06	2.04312e+06	1.79653e+06	-0.158242	0.23712	0.517907	2.01354
Q14157	UBAP2L	2.81332e+06	1435143		1.79441e+06	1.65163e+06	535617	241935	199034	245438	0.678536	0.452527	3.21477	1.4613
Q99623	PHB2	4.67528e+06	1.09316e+06	654308	1.09582e+06	629996	244083	883194	214195	992019	1.70507	0.499883	1.6201	0.484577
P05388	RPLP0	6.64577e+06	4.49466e+06	2.80497e+06	696355	548291	462950	908120	1.73401e+06	1.54081e+06	3.02975	1.66726	1.7372	1.33654
P83731	RPL24	8.16775e+06	3.38805e+06	2.05269e+06	1.75748e+06	1.339e+06	465082	1.27971e+06	725847	1.57471e+06	1.93392	0.818422	1.92637	0.827269
P35232	PHB1	1.61849e+06	1.31983e+06	1.02094e+06	1.66772e+06	1.47147e+06	1.01811e+06	956306	1.00494e+06	1.27553e+06	-0.0704172	0.0910118	0.290674	0.533273
O00264	PGRMC1	4.35769e+06	3.80167e+06	2.87518e+06	2.21099e+06	1.79216e+06	1.76513e+06	2.12687e+06	2.492e+06	2.89068e+06	0.935815	1.73783	0.555227	1.13841
P13647	KRT5	164001			24997.8	95262.6			463528	1.48889e+06	1.44754	0.471894	-2.57349	0.277073
P62195	PSMC5	3.61486e+06	1.23744e+06	517606	448890	731881	362937	658030	819238	448099	1.7985	0.606639	1.47976	0.537846
Q5BKZ1	ZNF326	2.81587e+06	278223	467621	3.20853e+06	1.69025e+06			902119		-1.04481	0.433274	0.39622	0.056793
P49411	TUFM	3.54288e+06	1.79156e+06	669249	4.16606e+06	3.93502e+06	3.51398e+06	3.36907e+06	4.89488e+06	5.96066e+06	-0.952075	1.02388	-1.24447	1.14592
Q96AG4	LRRC59	6.7224e+06	5.05233e+06	3.83142e+06	1.33174e+06	1.31131e+06	866115	1.06158e+06	1.57264e+06	2.30097e+06	2.15291	2.04244	1.66094	1.75632
A0A804HII9	ACTN1	3.4749e+06	1.04237e+06	1.37734e+06	961107	1.07074e+06	906086	1.08858e+06	677743	622416	1.00459	0.575285	1.30314	0.685735
Q14974	KPNB1	5.02035e+06	946316	876365	1.38676e+06	732049	582613	1.30329e+06	1.10439e+06	1.04137e+06	1.34092	0.423176	0.988436	0.341066
P42166	TMPO	1.81319e+06	1.74134e+06	301433				524064	690302	4188.53	#DIV/0!	#NUM!	1.66192	0.756875
E9PFW3	AP2M1	5.49213e+06	2.9376e+06	2.07137e+06	1.21139e+06	806530	721548	401990	880863	1.25238e+06	1.93857	1.17211	2.05035	1.18228
A0A7P0T9C4	DYNC1H1	2.67541e+06	2.01462e+06	653128							#DIV/0!	#NUM!	#DIV/0!	#NUM!
A0A7I2V5A3	HGS	4.3534e+06	2.80091e+06	2.27315e+06	3.18067e+06	2.86353e+06	1.38749e+06	401845	334158	691015	0.34318	0.328287	2.72387	1.86598
Q96EY1	DNAJA3	3.26805e+06	1.82025e+06		133175	83733.6	150975				4.37482	1.68397	#DIV/0!	#NUM!
P09651	HNRNPA1		1.44753e+06					2.59638e+06			#DIV/0!	#NUM!	-0.842908	#NUM!
P04843	RPN1	2.62247e+06	1.0566e+06	1.57577e+06	611475	504571		932821	1.00024e+06	441335	1.65029	0.85732	1.14609	0.908952
Q9Y2W1	THRAP3	1.26548e+06	2.75476e+06	2.97702e+06	1.71036e+06	2.22637e+06	1.44234e+06	756877	3.97618e+06	2.4635e+06	0.379437	0.389003	-0.0405156	0.0206128
A0A3B3IT92	MCM4	3.02482e+06	269953		3.08988e+06	1.6991e+06	157895	517350	787787	1.09685e+06	-0.0013767	0.00033497	1.04092	0.319939
O75533	SF3B1	660756	1.19823e+06	1.05405e+06			512603		520397	413486	0.921649	0.538041	1.05625	1.01333
P35998	PSMC2	4.38179e+06	1.17099e+06		220329	161427		254403		280825	3.86248	0.604429	3.37498	0.587447
P51531	SMARCA2	846015	242663	1.30548e+06				150038			#DIV/0!	#NUM!	2.41115	0.394866
P62314	SNRPD1	4772575	2.14661e+06	940800	2.26957e+06	1.95614e+06	1.39052e+06	702957	970321	1.3793e+06	0.484925	0.256319	1.3645	0.628389
Q5JSZ5	PRRC2B	1.29206e+06	434964	181462	1.0006e+06	715968	122574	22411.7	21496	27137.2	0.0533954	0.0181175	4.74756	0.846426
P46013	MKI67	2.56296e+06	1.23287e+06		418475	202436			98392.6	256750	2.61196	0.845902	3.41794	0.90661
A0A087X2I1	PSMC6	2.61484e+06	809499	737675				139599			#DIV/0!	#NUM!	3.31296	0.380306
O75396	SEC22B	2.38072e+06	1.25697e+06	229809				250693		211354	#DIV/0!	#NUM!	2.48032	0.554861
Q9BZE1	MRPL37	305984	308019	663405	1.90356e+06	1.77661e+06	1.96849e+06	1.05365e+06	1.25437e+06	1.46727e+06	-2.14469	3.42366	-1.56337	2.10791
P17980	PSMC3	3.87769e+06	1.54532e+06	5.74018e+06	1.29815e+06	441323		1.51569e+06	1.97026e+06		2.09706	0.763143	1.09416	0.52544
O75934	BCAS2	4.63497e+06	384139	1.38412e+06	1.39427e+06	1.31121e+06	361670	260719	251479	2.23202e+06	1.0619	0.348117	1.2224	0.351266
A0A6Q8NVI4	ARID1B	2.60775e+06	791369		1.20054e+06	661546	232647	138677		307637	1.28336	0.548178	2.92903	0.607417
Cp	CHIKV Cp	1.33875e+06	528685	428084	125622			1551449	1.05638e+06	1.94473e+06	2.60669	0.417024	-0.987857	0.909312
P62829	RPL23	6.53043e+06	2.7064e+06	2.69119e+06	2.68131e+06	1.94119e+06	1.58119e+06	1.46638e+06	1.12405e+06	1.57215e+06	0.943155	0.655311	1.5188	0.94273
A0A1B0GVI3	KRT10	599766			414127	641589			88792.9	2447158	0.184249	0.10948	-1.08006	0.0976131
P42167	TMPO	1.05204e+06	486695	608850	110482	59588.1	68068.9	296125	321234	277946	3.17284	1.67755	1.26227	1.13996
P62701	RPS4X	916020	588154		534958	535750	557867	314506	322847	459103	0.470323	0.729636	1.04109	1.18113
P62269	RPS18	791312	634246	766365	3.75273e+06	3.50619e+06	1.53576e+06	1.51301e+06	1.90525e+06	1.35818e+06	-2.00443	1.45357	-1.12374	2.14667
P31689	DNAJA1	5.07249e+06	4.05517e+06	3.89192e+06	921630	2.39669e+06	1.1568e+06	139424	1.00356e+06	891729	1.54068	2.07686	2.67779	2.87615
P29590	PML	6.57282e+06	3.6225e+06	666668	2.9632e+06	2.02055e+06	421316	1.54142e+06	1.60548e+06	1.47502e+06	1.0069	0.416425	1.23272	0.538231
P35580	MYH10	172649									#DIV/0!	#NUM!	#DIV/0!	#NUM!
Q9Y5B9	SUPT16H	2.01649e+06	735973	486114	196952		1.11438e+06	965646	1.19409e+06		0.719367	0.230574	-0.000454233	0.00017549
O15460	P4HA2	3.59128e+06	1.09046e+06	2.04062e+06	372591	468295	245039	333350	585481		2.63004	1.20673	2.28613	0.806603
Q05048	CSTF1	4.92962e+06	1.13178e+06	2.16262e+06	1.7878e+06	1.46858e+06	469250	1.27685e+06	1.08318e+06	987084	1.14236	0.552726	1.29693	0.645826
G8JLB6	HNRNPH1	1.20836e+07	3.42692e+06	3.12029e+06	9.26419e+06	6.70613e+06	4.31813e+06	3.10791e+06	3.20629e+06	2.69079e+06	-0.122968	0.0585427	1.04889	0.472667
Q9BVJ6	HNRNPH1	197769		382936	2.80507e+06	2.30638e+06	1.15504e+06				-2.84682	1.18077	#DIV/0!	#NUM!
Q9UQ35	SRRM2	2.13692e+06	1.07106e+06	700961	1.5948e+06	1.06353e+06	1.10863e+06	778697	2.00196e+06	1429094	0.0533767	0.0345753	-0.106957	0.0625488
Q9UKM9	RALY	2.81658e+06	1.59118e+06	1.69856e+06	942341	1.17439e+06	547401	2.35117e+06	1.51624e+06	2.79222e+06	1.19664	1.24577	-0.12514	0.124564
Q8IVT2	MISP	4289842	1.3651e+06	1058775	2.22084e+06	1.10384e+06	191546	277430	1.14967e+06	344990	0.933084	0.377418	1.92166	0.704237
Q96KR1	ZFR	3.54613e+06	2.11874e+06	2.26e+06	209010	1.24409e+06	681956	130193	153300	125994	1.89211	1.62309	4.2745	2.27794
Q14676	MDC1	994817				228846					2.12006	#NUM!	#DIV/0!	#NUM!
P40227	CCT6A	1.1991e+06	812013	287396	695202	415893	178076	529438	621827	345276	0.834256	0.48173	0.619068	0.410899
A0A6Q8PGB0	POLR2A	334208	589337		168468	128571					1.63653	0.86627	#DIV/0!	#NUM!
P08559	POLR2A	8.5609e+06	859809	1.03872e+06	1.24079e+07	1.40323e+07	1.32678e+07	1.4516e+07	1.20337e+07	8.07959e+06	-1.92463	1.71057	-1.72719	1.2003
Q9UNF1	MAGED2	5.20979e+06	4.3796e+06	1.6334e+06	94871	585855	986326	556986	245948	268414	2.75106	1.34099	3.38893	1.44855
Q13751	LAMB3	1.15565e+06	220547								#DIV/0!	#NUM!	#DIV/0!	#NUM!
Q9BUJ2	HNRNPUL1	2.01406e+06	599893	235238	349035	70392.8		75368.1	81016.1		2.1791	0.42862	3.60242	0.520429
O75323	NIPSNAP2	3.67742e+06	1.27348e+06	3.2542e+06	4.0488e+06	3.02186e+06	2.4385e+06	980562	596748	813176	-0.212797	0.189482	1.77922	1.21556
P45880	VDAC2	3.81132e+06	2.54727e+06	3.82046e+06	1.79118e+06	2.12252e+06	2.15992e+06	2.33401e+06	2.53092e+06	2.04612e+06	0.744976	1.44884	0.55863	1.1494
Q9NRR5	UBQLN4	3.88889e+06	2.10945e+06	2317327	5.16688e+06	4.94629e+06	3.04175e+06	1.79315e+06	1.74233e+06	1.9146e+06	-0.661699	0.853869	0.609556	0.780911
P52701	MSH6	1.56617e+06	435161								#DIV/0!	#NUM!	#DIV/0!	#NUM!
Q9GZV5	WWTR1	2.54547e+06	1.25802e+06	1.20745e+06	894398	328668	557131	291305	493178	347291	1.49304	1.08261	2.14649	1.36663
P30837	ALDH1B1	163914			1.59426e+06	1.2314e+06	1.26425e+06	134485			-3.0561	1.45145	0.285488	#NUM!
O75643	SNRNP200	1.74954e+06	954812	448416				448801			#DIV/0!	#NUM!	1.22751	0.292479
A0A0U1RRH7	SNRNP200	6.41001e+06	2894047	1.44941e+06	5.41393e+06	4.36132e+06	3.9814e+06	3.43189e+06	4.31275e+06	4.32894e+06	-0.355328	0.259915	-0.167052	0.105578
P49327	FASN	1.29635e+06	675202	451923	263154	89010.9		232147	106663	84060.5	2.19779	0.813436	2.51879	1.22012
M0R0C6	KHSRP	2.61417e+06	805272	1.13054e+06	1688935	1.72769e+06	1.28865e+06	492789	717204	384477	-0.0484179	0.030353	1.51278	0.80596
P35568	IRS1	1.19067e+06	515907		663484	480614	601066		109120	135837	0.552704	0.426729	2.8005	0.788199
A0A7I2YQC0	NPM1	3.32762e+06	1.3007e+06	459118	3.25303e+06	4.85348e+06	486750	93342.2	120913	141976	-0.756266	0.311157	3.83605	0.8613
P61964	WDR5	1.55918e+06			451780	263125					2.12496	1.06539	#DIV/0!	#NUM!
P62280	RPS11	778862	421019		1.00423e+06	1.227e+06	995508		1.07488e+06	1.2147e+06	-0.842223	1.19565	-0.932189	0.978505
Q8NFH5	NUP35	5.24434e+06	1.63673e+06	2.80744e+06	4.53803e+06	1.59161e+06		271668	756747	291334	0.0755086	0.0309384	2.87601	1.21991
Q9BY89	KIAA1671	2.97572e+06	962022	2.66547e+06	1.88452e+06	1.54858e+06	600058		104051	8419.73	0.711257	0.510929	5.29058	1.11411
P62263	RPS14	1.67718e+06	1.09107e+06		1.71677e+06	1.96721e+06	1.32636e+06	746549	662438	1.69121e+06	-0.270975	0.352881	0.421573	0.286773
Q15365	PCBP1	2.36838e+06	464521	277798				133955		147750	#DIV/0!	#NUM!	2.88002	0.425816
P05165	PCCA	2.4028e+06	730678	459193	2.61172e+06	1.36501e+06	1.35943e+06	260929		363864	-0.570743	0.323918	1.93864	0.46626
Q6IPX4	RPS16	3.7396e+06	1.15311e+06	747623	5.10434e+06	2.69477e+06	2.87405e+06	1.33845e+06	1.80282e+06	1.99055e+06	-0.920135	0.620093	0.136309	0.0614753
A0A087WUZ3	SPTBN1	4.57053e+06	3.17083e+06	924638	902022	1.27274e+06	392859	1.21056e+06	1.10748e+06	982143	1.75493	0.865877	1.39282	0.774598
H0Y4W2	TRRAP	1.52625e+06	331869		144473	176234				187576	2.53452	0.485436	2.3083	0.218921
P62318	SNRPD3	3.95119e+06	890033	539309	1.99241e+06	1.5084e+06	316971	314391	333284	614607	0.495014	0.164453	2.09171	0.559751
P35052	GPC1	2.37558e+06	1.01862e+06	1.01839e+06	1.37156e+06	897191	550534	234000		198233	0.646293	0.446779	2.76678	0.917448
Q6NZY4	ZCCHC8	1.1012e+06	467291								#DIV/0!	#NUM!	#DIV/0!	#NUM!
P62277	RPS13	2.82403e+06	1.0439e+06	287810	1.58482e+06	1.14909e+06	373435	802016	730381	1.22586e+06	0.419424	0.157563	0.591348	0.239082
Q9NWH9	SLTM	2.43944e+06	2.3674e+06	3.19876e+06	2.24168e+06	1.80858e+06	1.10171e+06	1.04068e+06	663528	1.79051e+06	0.635885	1.05017	1.19583	1.61954
Q8N163	CCAR2	1.39663e+06	709101	682976	167774	252106					2.14658	1.00766	#DIV/0!	#NUM!
Q8WXF1	PSPC1	1.70727e+06	218134	348172	1.27623e+06	1.04968e+06	881575	81275.1		513521	-0.49648	0.25217	1.34953	0.283061
E9PAU2	RAVER1	3.36407e+06	846298		541062			303219			1.96008	0.219069	2.79551	0.251562
O14578	CIT	850244	230718	443763							#DIV/0!	#NUM!	#DIV/0!	#NUM!
Q16698	DECR1	1.43237e+06		658962	4.44875e+06	2.35316e+06	2.20941e+06	301047	422077	562955	-1.52235	0.857116	1.28641	0.867407
Q13310	PABPC4	244607	145310		141944	153570	154254	173516	144923		0.378949	0.502417	0.292156	0.25134
A0A804HKI2	LRPPRC	1.95964e+06	1.16039e+06	463100	799466	880442	651514	1.48628e+06	1.177e+06	1.58348e+06	0.620011	0.404217	-0.245141	0.188201
P68431	H3C1	9.12349e+06	3.99542e+06		6.10921e+06	3.69422e+06	462232	5.85728e+06	6.06437e+06	643202	0.938783	0.454584	0.647216	0.314548
P23396	RPS3	916533		238680	2.52938e+06	1.90376e+06	601856	483154	466172	591640	-1.53887	0.600789	0.169286	0.086184
Q96I25	RBM17	2.2087e+06	765814		148721	188071					3.14272	0.679521	#DIV/0!	#NUM!
P54886	ALDH18A1	828018	320326		559690	332376	187419	353070	203570	511936	0.674175	0.367065	0.688829	0.400768
O76031	CLPX	1.89982e+06	1.1034e+06	781973	776525	671798	182168		109068	142228	1.21506	0.881765	3.32795	1.11259
Q96JB6	LOXL4	2.90079e+06	1.00783e+06	884191	737667	489789	524907				1.45157	0.703605	#DIV/0!	#NUM!
P04406	GAPDH	2.28479e+06	285974	794757	935865	1.0941e+06	290524	1.84595e+06	274475	2.86119e+06	0.536402	0.207986	-0.565787	0.217923
Q7Z3K3	POGZ	3.02847e+06	1.33195e+06	1.79093e+06	462266	302620	113962	174190	225660		2.80722	1.56516	3.35841	1.1785
A0A2R8Y4T1	TNS1	1.98931e+06	1.44166e+06	1.45063e+06	203332	524460	572124	399846	429237	615657	1.90893	2.28887	1.75654	2.39158
Q5SRE5	NUP188	2.20733e+06	1.10441e+06	410402						100095	#DIV/0!	#NUM!	3.63173	0.40948
P21796	VDAC1	3.97414e+06	1.62558e+06	1.119e+06	1.3026e+06	927993	904173	1.39954e+06	1.58509e+06	1.64452e+06	1.09983	0.601808	0.53744	0.324072
Q8N1F7	NUP93	1.76965e+06	1.31064e+06				337537	440617			2.18995	0.692008	1.80547	0.655905
Q15907	RAB11B	2.23812e+06	1.75421e+06	383378	825006	332079	406036	754630	911823	840628	1.48509	0.746943	0.803507	0.486372
P10070	GLI2	1.27414e+06	925659	623386	278981	190016	189789				2.09944	1.71528	#DIV/0!	#NUM!
F5H2F4	MTHFD1	1.62307e+06	1.07796e+06		2.0247e+06	1.79489e+06	1.65113e+06	522675	1.18069e+06	785203	-0.433255	0.820107	0.703159	0.695301
P32322	PYCR1	2.3644e+06	1.55407e+06		1.36833e+06	919831	924700	676320	660702	1.18617e+06	0.871395	1.0502	1.22	1.23189
Q08211	DHX9	1.02601e+06	786573	92863	502046	628792	42679.7	411612	481664	506723	0.699287	0.298636	0.4447	0.235503
Q9C005	DPY30	2710733	505409		478684	980360	474796			100588	1.31883	0.469302	3.9988	0.240622
H7C0C1	DPY30	1.00807e+06	419807	286313	994987	962745	211891	882545	896216	984241	-0.339918	0.169377	-0.688711	0.713117
Q8WX93	PALLD	709025	239883		1.00843e+06	1.01337e+06		97871.7	139963	174097	-1.0913	0.825362	1.78883	0.814917
O43166	SIPA1L1	2.21943e+06	627671	2.12519e+06	550331	497240	309563		142575		1.87335	1.08797	3.53915	0.553494
P51148	RAB5C	1.12503e+06	388311	724929							#DIV/0!	#NUM!	#DIV/0!	#NUM!
P25205	MCM3	724695	360331		698540	487126	312072	283010	245311	287060	0.119907	0.07514	0.997145	0.846658
Q14683	SMC1A	1.74533e+06	396886		749968	495905		302078	403146	524655	0.781945	0.236071	1.38555	0.545055
O14773	TPP1	2.3983e+06	1.44109e+06	2.15664e+06	2.46001e+06	1.83631e+06	1.26748e+06	1.3286e+06	2.0341e+06	1.59865e+06	0.107934	0.116829	0.273275	0.415383
A0A7I2V5R6	TPP1	1.64114e+06	1.23896e+06		1.90977e+06	1.35663e+06	1.26728e+06	1.74788e+06	1.42032e+06	1.83912e+06	-0.0696037	0.0822309	-0.21296	0.421834
Q969G3	GNAS	622358	69995.8		732276	1.34989e+06	864582	553694		705132	-1.50458	0.856068	-0.862498	0.369685
P61247	RPS3A	759293			964090	742225		228235		323008	-0.168155	0.148309	1.46197	0.970572
P62753	RPS6										#DIV/0!	#NUM!	#DIV/0!	#NUM!
Q8NEY8	PPHLN1	1.46013e+06	1.55201e+06	1.8654e+06	2.21097e+06	5.72541e+06	7.95312e+06	4.91383e+06	2090900	780019	-1.70385	1.0284	-0.674499	0.324742
Q13151	HNRNPA0	325017	280229	456276	1.6311e+06	738066	873389	83581.2	133543	168125	-1.611	1.20785	1.46227	1.74494
Q9H1B7	IRF2BPL	799344		472534		172783					1.87993	0.456922	#DIV/0!	#NUM!
O94776	MTA2	1.98007e+06	813423	760398		63116.4				84470.3	4.23028	0.531316	3.80985	0.521334
O43175	PHGDH	1115034	626837	584220	296410	368001	229844	276356	431612	214679	1.37915	1.27987	1.33406	1.2073
P49790	NUP153	2.66615e+06	1.62877e+06	2.50383e+06	1.90613e+06	1.82481e+06	2.15407e+06	1.09699e+06	1.30146e+06	1.53527e+06	0.208226	0.379594	0.789376	1.29324
P62820	RAB1A	1.15662e+06	525292					147261			#DIV/0!	#NUM!	2.51366	0.37168
P04908	H2AC4	504554	220508			142239			362436		1.34979	0.271604	0.000375646	0.000105981
A0A669KBJ7	ADNP	896515	372460								#DIV/0!	#NUM!	#DIV/0!	#NUM!
O60664	PLIN3	1.15847e+06	93512.8						147029		#DIV/0!	#NUM!	2.09004	0.157973
A0A7I2V508	BAG6	2.608e+06	317517	465850				114006	135116	159436	#DIV/0!	#NUM!	3.05325	0.601536
Q5JTV8	TOR1AIP1	1.38271e+06	554112	1.24334e+06	717638	795259	247903	289378	255894	565026	0.852869	0.700512	1.51815	1.18282
P35556	FBN2	1.47464e+06	1.04083e+06		1.44291e+06	735732	964840				0.263426	0.258527	#DIV/0!	#NUM!
A0A3B3IS55	ABLIM1	743355	150122		1.68394e+06	1.40979e+06		187663			-1.79184	1.10772	1.25129	0.153257
P63173	RPL38	2.8643e+06	1.07394e+06		4.08613e+06	4.14893e+06	4.23091e+06	2.41455e+06	1.73593e+06	2.51841e+06	-1.07741	1.3286	-0.174934	0.122766
O60264	RPL38	1.04366e+06	797079	1.45722e+06	116826	11102.8	31101.5	659059	486544	298800	4.3742	2.2324	1.1911	1.3215
P22695	UQCRC2	375248			803701	616036	429376				-0.715954	0.419506	#DIV/0!	#NUM!
J3QLS3	MRPS7	2.18676e+06	778027	263583	1.13262e+06	1.1343e+06	413703		271361	375133	0.268235	0.105678	1.73513	0.413857
A0A2R8Y5A3	CTNNB1	1.8747e+06	1.19009e+06	216172	438052	313065	151821	260584	163993	458442	1.86142	0.745152	1.8936	0.750968
D6REX3	SEC31A	1.83377e+06	1.47545e+06	729274	155994	109838	1.65367e+06	137357		69282.6	1.07309	0.514132	3.70367	1.22299
A0A087WYR3	TPD52L2	962817			247410						1.96036	#NUM!	#DIV/0!	#NUM!
Q9NYF8	BCLAF1	1.14318e+06	610519	423565	1.3647e+06	1.31675e+06	1.21049e+06	528532	687852	811785	-0.837975	1.21876	0.102336	0.0757533
P53621	COPA	1.33188e+06	719304	1.33851e+06	197782				106855	207511	2.51421	0.820353	2.84567	1.44492
H0YMW4	ANXA2		320513		369380			1.19672e+06	1.36807e+06	708951	-0.204726	#NUM!	-1.76752	0.720728
O60716	CTNND1	1.57455e+06	515415		573174	518710					0.936658	0.350673	#DIV/0!	#NUM!
K7ELL7	PRKCSH	807716			2.35936e+06	1.81752e+06	702104	179228	282267	393686	-1.0097	0.309995	1.50258	1.28547
A0A7I2YQI2	EIF3I	2.51496e+06									#DIV/0!	#NUM!	#DIV/0!	#NUM!
Q6ZN40	TPM1	957792	502814	499784	970153	840088	1.09903e+06	480578	560740	471916	-0.569517	0.868022	0.373507	0.408869
E1	CHIKV E1	1.31889e+06	1.08028e+06					3.86285e+06	3.54866e+06	3.61775e+06	#DIV/0!	#NUM!	-1.61577	3.30016
O15042	U2SURP	193663	258474								#DIV/0!	#NUM!	#DIV/0!	#NUM!
A0A0A6YYL6	RPL17-C18orf32	2.0041e+06	1.89843e+06		2.72065e+06	1.95454e+06	2.43224e+06	1.32162e+06	2.36231e+06	2.46524e+06	-0.279958	0.607981	-0.0710184	0.0713487
Q9UPN9	TRIM33	312791									#DIV/0!	#NUM!	#DIV/0!	#NUM!
P60842	EIF4A1	476934	707522			161002	184756	399536			1.77639	1.16354	0.567828	0.291273
O75947	ATP5PD	268746		413504	1.99031e+06	2.08996e+06	837563	182289	406063	308267	-2.26469	1.05261	0.190769	0.155066
Q9BTC0	DIDO1										#DIV/0!	#NUM!	#DIV/0!	#NUM!
Q16891	IMMT										#DIV/0!	#NUM!	#DIV/0!	#NUM!
Q9UGP4	LIMD1	791951	365259		407851	449678	468134				0.388899	0.339745	#DIV/0!	#NUM!
A0A3B3IUD7	PDCD11	1.13361e+06	659645	211287		150558		103102			2.14992	0.362905	2.69617	0.398089
A0A5H1ZRQ2	DDX17	504154	302146			171212			36774.3		1.23553	0.385733	3.45455	0.547286
E9PHZ5	CTSB	748798			3.35484e+06	2.70751e+06	773160	487438	401642		-1.60544	0.368576	0.752264	0.816784
H0YMV8	RPS27L	1.21564e+06	190792		731986	619699	197403	242072	151855	244728	0.445584	0.15671	1.72389	0.535408
P62913	RPL11	122297			3.38192e+06	2.90153e+06	1.49589e+06	1.93992e+06	2.07504e+06	1.40506e+06	-4.40622	0.793981	-3.88487	1.26567
P16402	H1-3	1.61999e+06			1.98905e+06	3.00753e+06	2.14741e+06	1.32958e+06	1.36745e+06	2.04883e+06	-0.555779	0.453394	0.0342802	0.0256974
A0A494C039	HYOU1	306391			1.26787e+06	849593	321963	242769	609459	509423	-1.40813	0.344608	-0.566949	0.244249
O75150	RNF40	938240	374174		207461	167969					1.80561	0.620957	#DIV/0!	#NUM!
J3KPD3	RBM7	1.61439e+06	490182	2.86016e+06							#DIV/0!	#NUM!	#DIV/0!	#NUM!
P32969	RPL9										#DIV/0!	#NUM!	#DIV/0!	#NUM!
Q09666	AHNAK	978298	154023		664811	485445	153881	268726	137311	571621	0.38115	0.130064	0.796843	0.266953
Q86YZ3	HRNR	87787.4	218135	58479.5	98815	327349	218134	33390.4	2.53184e+06	5.74186e+06	-0.822198	0.494908	-4.51074	0.734095
Q92793	CREBBP	805327	582676	488065							#DIV/0!	#NUM!	#DIV/0!	#NUM!
P78406	RAE1	2.57456e+06	1.51143e+06	357495	2.1489e+06	1.52565e+06	1.49378e+06	1.18511e+06	864199	1.05506e+06	-0.218005	0.131714	0.51739	0.277239
Q6YN16	HSDL2										#DIV/0!	#NUM!	#DIV/0!	#NUM!
E9PH57	TCF4	2.36638e+06	1.68963e+06	1.25442e+06	1.76416e+06	1.08456e+06	617191	152699	106043		0.615594	0.591774	3.77428	1.5313
Q00653	NFKB2	2.51005e+06	754877	1.83312e+06							#DIV/0!	#NUM!	#DIV/0!	#NUM!
Q15287	RNPS1	3.15102e+06	1.1976e+06	798439	3.41637e+06	1.16964e+06	927388	432805	282171	545005	-0.0991968	0.0385547	2.03035	0.821224
O95782	AP2A1										#DIV/0!	#NUM!	#DIV/0!	#NUM!
Q99081	TCF12	637602	338962		280910						0.797608	0.24432	#DIV/0!	#NUM!
P12956	XRCC6	958889	439157		500312	451466	399244	211658	470456	557869	0.634323	0.527713	0.758054	0.505687
P38159	RBMX	776228	222616		1.12835e+06	848162					-0.984624	0.592111	#DIV/0!	#NUM!
Q9NY61	AATF	951277	263450		346218	527960	104886	95087.2	86162	115701	0.896118	0.377073	2.6173	0.848094
Q92621	NUP205	876971	128393						77278.5		#DIV/0!	#NUM!	2.70151	0.200451
O43143	DHX15	1.53488e+06	1.15529e+06		242707			116854			2.47041	0.734006	3.52492	0.778614
P42285	MTREX	1.04216e+06	502173								#DIV/0!	#NUM!	#DIV/0!	#NUM!
Q8NCA5	FAM98A	1054096	416364	755732	450265	324439		202081		328310	0.937898	0.620533	1.48449	0.842018
P27635	RPL10	2.50292e+06	1.10441e+06	447207	896518	1.02693e+06	345968	211950	216908	275617	0.837215	0.39164	2.52492	0.855719
P43686	PSMC4	3.31318e+06	1.37307e+06	1.2618e+06	186435	609685	343539	770151	608838	940277	2.38382	1.11271	1.35875	0.833771
P52597	HNRNPF	1.85793e+06	1342767		3.90771e+06	3.52759e+06	3.31266e+06	1.07127e+06	1.22918e+06	914665	-1.16264	2.17018	0.578478	0.998716
I3L4C2	BAIAP2	601241		468982							#DIV/0!	#NUM!	#DIV/0!	#NUM!
A6NHR9	BAIAP2	637289	364233								#DIV/0!	#NUM!	#DIV/0!	#NUM!
P46778	RPL21	1.40627e+06	447335		1.79823e+06	1.28242e+06	705427	1.1428e+06	1.07001e+06	1.29797e+06	-0.445406	0.23655	-0.336494	0.255486
Q92922	SMARCC1	282895				102339					1.46691	#NUM!	#DIV/0!	#NUM!
Q8IVL6	P3H3	827465	219592		572878	259290	386309	321237	408124	362503	0.366222	0.169475	0.524509	0.271001
Q8WYP5	AHCTF1	1.75677e+06	592236				410620				1.51617	0.231127	#DIV/0!	#NUM!
O43615	TIMM44	701626	277795	137127				126071	129358		#DIV/0!	#NUM!	1.54309	0.461302
P62266	RPS23	2.96827e+06	1.64105e+06	706851	2.01024e+06	1.54206e+06	926200	1.61017e+06	1.75168e+06	1.43446e+06	0.247375	0.142319	0.148464	0.0933606
Q02880	TOP2B	821656	696454	324323	188533	109043					2.04532	1.01265	#DIV/0!	#NUM!
Q9BV38	WDR18	626108	692474		733616	1.05815e+06	503629	259683	431604	642318	-0.214795	0.188676	0.568618	0.628751
A0A6Q8PFY7	TFG	1.94195e+06	163471	1.41308e+06			301021	214555			1.96206	0.305111	2.45058	0.337792
Q12905	ILF2	1.24638e+06	857787	1455475	831626	459372	622807	753515	854691	858990	0.895288	1.2526	0.528859	0.95508
Q96S55	WRNIP1	1.51501e+06	841164	423030							#DIV/0!	#NUM!	#DIV/0!	#NUM!
Q9UPN4	CEP131	658172	156610		191980	119229					1.38853	0.371492	#DIV/0!	#NUM!
Q14966	ZNF638	1.65415e+06	552930	774474	291271	181517	167053	337582	124492	152981	2.22028	1.08388	2.27728	1.08161
P26373	RPL13	256597		167307	415341	178638	4859.59	98328.1	110642	276227	0.0865316	0.0257845	0.390127	0.236593
Q01844	EWSR1	828679	466532	382829	1.01655e+06	955753		93504.7	144451		-0.818067	1.01702	2.23305	1.04887
Q9UHD9	UBQLN2	1.59003e+06	811488			703109	909341				0.57469	0.365995	#DIV/0!	#NUM!
P13010	XRCC5	985960	1.03897e+06	513725		492415	307103	633022	1.01054e+06	1.00811e+06	1.0819	0.844427	-0.062837	0.0626787
Q9Y5L4	TIMM13				786803	211688					#DIV/0!	#NUM!	#DIV/0!	#NUM!
Q92925	TIMM13	570569	453102								#DIV/0!	#NUM!	#DIV/0!	#NUM!
O75886	STAM2	443470									#DIV/0!	#NUM!	#DIV/0!	#NUM!
AKC88565.1	STAM2	2.02826e+06	776246	310422							#DIV/0!	#NUM!	#DIV/0!	#NUM!
Q14566	MCM6		163602	229271	706392	590251	342581			255629	-1.47591	1.05244	-0.379988	0.312231
F8VXC8	SMARCC2	2.11131e+06	132357		356563	125124				90303.1	2.21969	0.328081	3.63494	0.183709
Q8NDT2	RBM15B	1.4794e+06	766441	432332						97003.8	#DIV/0!	#NUM!	3.2021	0.486086
Q6P2E9	EDC4	462092	440453	312478		354780	567130	261349			-0.186677	0.212459	0.631974	0.578798
Q5VTR2	RNF20	756136	342005	114341	193329	208483	71962.5	80788.4	74952.7	85631.9	1.35569	0.567728	2.32863	0.795856
Q9Y3I0	RTCB	872661	456671		656590	642802	369817	107430		129571	0.256499	0.207718	2.48774	0.921362
Q9Y2X3	NOP58	477020	440223	379702		177652			203510		1.28303	1.3351	1.08699	1.24911
O14980	XPO1	1.53781e+06	506370	443872			640137	137977	279823	219104	0.373603	0.0890241	1.96587	0.798524
P31930	UQCRC1	248676	149134		241413	223287	217540	124539			-0.19324	0.292368	0.675479	0.262125
Q13033	STRN3	876300	218420	240017	206310	103194			113744	133165	1.52356	0.422445	1.84954	0.478536
O60216	RAD21	632502	824398	743804				203880	207881		#DIV/0!	#NUM!	1.83312	2.28291
Q8WXI9	GATAD2B	1.11555e+06	215723		292100	203159	128143				1.67953	0.565733	#DIV/0!	#NUM!
Q12874	SF3A3	406624			711505	383770	466349	380632	347603		-0.356317	0.206742	0.159292	0.423558
Q96D53	COQ8B										#DIV/0!	#NUM!	#DIV/0!	#NUM!
P85037	FOXK1	1.84602e+06	409229	462303	297125	246909	246133	133221	310013		1.78208	0.612678	2.0312	0.463204
P46940	IQGAP1	232751	289318								#DIV/0!	#NUM!	#DIV/0!	#NUM!
Q13724	MOGS	1.1454e+06	608103	403822	176449	234823	271130	200061	113280	221657	1.66055	1.03605	2.01163	1.13729
Q9UBG0	MRC2	955464	470981		1.38957e+06	1.7174e+06	1.20459e+06	461338	690673	457559	-1.01082	1.14484	0.410711	0.342553
A0A0A0MRJ6	PCMT1	777757									#DIV/0!	#NUM!	#DIV/0!	#NUM!
Q9HCN8	SDF2L1	1.17685e+06	187765		1.25343e+06	1.06095e+06	105538	90708.7	92191.2	156468	-0.241506	0.0725768	2.59253	0.655085
Q5T6F2	UBAP2	1.58253e+06	864918		313972	313033					1.96473	0.897714	#DIV/0!	#NUM!
O00159	MYO1C										#DIV/0!	#NUM!	#DIV/0!	#NUM!
Q96PE2	ARHGEF17	644033	313147	450903	153251	431254					0.683484	0.452303	#DIV/0!	#NUM!
P38432	COIL	205272	783309	1.30418e+06			1.18988e+06	775164		698064	-0.638698	0.242934	0.0531425	0.0220104
E9PLP8	CSTF3	1.05256e+06	182826								#DIV/0!	#NUM!	#DIV/0!	#NUM!
Q92769	HDAC2	5.68785e+06	2.44304e+06	618261	883432	811785	290792	57742.2	497397	326804	2.13927	0.686432	3.31038	0.815899
A0A2Y9D025	NDUFA6	755961	129372	370590							#DIV/0!	#NUM!	#DIV/0!	#NUM!
A0A0U1RRM4	PTBP1		126631								#DIV/0!	#NUM!	#DIV/0!	#NUM!
P62979	RPS27A	2.23032e+06	1.57667e+06		1.37902e+06	1.29788e+06	272363	1.24507e+06	813553	1.47689e+06	0.953259	0.756833	0.691695	0.886531
O95071	UBR5	729546	722140	591628							#DIV/0!	#NUM!	#DIV/0!	#NUM!
Q9UPQ9	TNRC6B	617037	152450	266795	67607.3	59360.7	48638.2	38840.1	46009.4	38447.1	2.561	0.960415	3.07121	1.02208
P0C0S5	H2AZ1	1.19068e+07	6.26622e+06	12083707	13164738	1.27809e+07	9396500	7930974	8856974	1.22703e+07	-0.224135	0.306326	0.0583058	0.05961
Q5VT52	RPRD2	350054	223787			382165	409505				-0.464247	0.6311	#DIV/0!	#NUM!
Q12931	TRAP1	94329.9	108135					145833	163618		#DIV/0!	#NUM!	-0.612039	1.38149
A0A0D9SF53	DDX3X	877041									#DIV/0!	#NUM!	#DIV/0!	#NUM!
B5ME19	DDX3X	1.33328e+06	1.06675e+06	1.03183e+06	248960	344042		415009	425128	282335	1.94792	2.15472	1.61231	2.72331
Q56VL3	OCIAD2	772808	206692	281024	777387	1.30114e+06	1042340	432278	164311	574962	-1.30792	1.24811	0.105604	0.0473325
Q9BTA9	WAC	1.41517e+06	654787			369528					1.48584	0.303938	#DIV/0!	#NUM!
Q13185	CBX3	491966	228550	173726	40821.6	106153	46563.8	42789.6	2718.32		2.20805	1.09358	3.71151	0.92084
P42025	ACTR1B	506462	152786								#DIV/0!	#NUM!	#DIV/0!	#NUM!
Q9Y305	ACOT9	1.45326e+06	462693		1.66679e+06	1.44529e+06	1.2572e+06	687192		775800	-0.604366	0.521851	0.389143	0.158985
A0A7P0T9G6	TUBG1	498381	185949								#DIV/0!	#NUM!	#DIV/0!	#NUM!
Q9H9B4	SFXN1	186153	122796			323454	397805	501692	384206	438480	-1.22315	1.2856	-1.51491	1.98401
O60885	BRD4	517004	339484	192196	397922	456393	93265.7	94445.9	88237.4	87908.4	0.146261	0.0812114	1.95439	1.29436
P11388	TOP2A	465204	584976	493483				140207		146362	#DIV/0!	#NUM!	1.84444	2.38132
A0A669KAV7	WIZ	1.23249e+06	130089		591916	138026	174494	220444		118586	1.17621	0.335117	2.00685	0.344084
Q06830	PRDX1		94609.1			127443	129380			236106	-0.440724	1.50088	-1.31938	#NUM!
Q9P2I0	CPSF2										#DIV/0!	#NUM!	#DIV/0!	#NUM!
O75694	NUP155										#DIV/0!	#NUM!	#DIV/0!	#NUM!
Q53EP0	FNDC3B	650585	270736	313993	25513.1	33693.2		27559	46895.1	40577.3	3.79802	1.0436	3.42478	1.44394
NSP1	CHIKV NSP1	680623	322272	639085				288519	334275	404565	#DIV/0!	#NUM!	0.676496	0.801962
Q14498	RBM39	506251	439790							195439	#DIV/0!	#NUM!	1.27519	0.885522
P69905	HBA1	580536	269880			392057					0.117107	0.0352936	#DIV/0!	#NUM!
Q9UKJ3	GPATCH8	785328	302426								#DIV/0!	#NUM!	#DIV/0!	#NUM!
P49736	MCM2										#DIV/0!	#NUM!	#DIV/0!	#NUM!
Q08380	LGALS3BP	503421	261428		207677	457834	404628				0.100411	0.0657956	#DIV/0!	#NUM!
Q9Y6Y8	SEC23IP	1.36408e+06	269905								#DIV/0!	#NUM!	#DIV/0!	#NUM!
Q9NZU5	LMCD1	204403			1.68164e+06	1.47096e+06	226075				-2.46201	0.37989	#DIV/0!	#NUM!
P07199	CENPB	651402									#DIV/0!	#NUM!	#DIV/0!	#NUM!
Q5TDF0	NTPCR	752974	304164								#DIV/0!	#NUM!	#DIV/0!	#NUM!
Q96RE7	NACC1	590559	265581	618276							#DIV/0!	#NUM!	#DIV/0!	#NUM!
Q96IF1	AJUBA	861067	403790								#DIV/0!	#NUM!	#DIV/0!	#NUM!
Q9Y5M8	SRPRB	2.13378e+06	691741	295456	256423	412382					1.63738	0.396705	#DIV/0!	#NUM!
Q6NZI2	CAVIN1	400154	159202	237048	1.36205e+06	1.59175e+06	302463	102549	615327	768425	-2.03164	0.951364	-0.900154	0.465902
Q04637	EIF4G1	765343	863244		202381						2.00847	1.05725	#DIV/0!	#NUM!
P05023	ATP1A1	486488									#DIV/0!	#NUM!	#DIV/0!	#NUM!
P62191	PSMC1										#DIV/0!	#NUM!	#DIV/0!	#NUM!
Q13283	G3BP1	335687									#DIV/0!	#NUM!	#DIV/0!	#NUM!
Q9Y2U8	LEMD3	300630	161973								#DIV/0!	#NUM!	#DIV/0!	#NUM!
Q13838	DDX39B	961007	725885	715595	1.0085e+06	501302	838651		111246	422457	0.0328154	0.0360366	1.58546	1.38334
Q08945	SSRP1	867089	238517		682702	429943					-0.00915662	0.00320254	#DIV/0!	#NUM!
P02751	FN1										#DIV/0!	#NUM!	#DIV/0!	#NUM!
Q7Z3B4	NUP54	921344	295130	670331	275369	131198		96801.2	183394	357496	1.62942	0.755733	1.56501	0.988743
Q86Y46	KRT73										#DIV/0!	#NUM!	#DIV/0!	#NUM!
Q06587	RING1	321005	272211		161792	487264					-0.129783	0.0550823	#DIV/0!	#NUM!
Q6UVK1	CSPG4										#DIV/0!	#NUM!	#DIV/0!	#NUM!
P61026	RAB10	407091	323558				187949	325964	193015	194966	0.958838	0.608127	0.618327	0.841656
Q9UJY1	HSPB8	624231	177552	547401	366399	293496	120558			121007	0.789703	0.536085	1.89396	0.449143
P04844	RPN2	1649107		1.52546e+06						767062	#DIV/0!	#NUM!	1.04914	1.08277
Q13740	ALCAM	878671	644348	274402	974568	234352	765591	448865	696867	457994	-0.135568	0.0734605	0.164501	0.121671
Q92610	ZNF592	1.15964e+06	315875	839187							#DIV/0!	#NUM!	#DIV/0!	#NUM!
Q15021	NCAPD2	734716	407866								#DIV/0!	#NUM!	#DIV/0!	#NUM!
P19387	POLR2C					221944					#DIV/0!	#NUM!	#DIV/0!	#NUM!
P09496	CLTA	3.02459e+06	729130	218474	203105	470597				135500	1.97479	0.354146	3.2886	0.250117
O43865	AHCYL1										#DIV/0!	#NUM!	#DIV/0!	#NUM!
Q9NPA8	ENY2	573020	117057								#DIV/0!	#NUM!	#DIV/0!	#NUM!
Q5JRA6	MIA3										#DIV/0!	#NUM!	#DIV/0!	#NUM!
P35250	RFC2	614830	197317								#DIV/0!	#NUM!	#DIV/0!	#NUM!
P16070	CD44	479056	427947	701863	369325	305827	297491	348163	476558	330733	0.726061	1.14509	0.477584	0.721388
O75554	WBP4	507070	90927.5	811728	80672.1	102663	89883.5	34656	24166.5	22665.9	2.36729	0.841297	4.11268	0.993731
Q08209	PPP3CA										#DIV/0!	#NUM!	#DIV/0!	#NUM!
P26006	ITGA3	459448	297083		352866	349382	392098	299931	213663	243091	0.0523639	0.073478	0.584669	0.784524
P10515	ITGA3	1.70386e+06	760232	1481629	562593	470328	616410	684280	774225	856818	1.25841	1.24783	0.769076	0.875004
Q16610	ECM1		67941.9		264107	183181					-1.71883	0.569828	#DIV/0!	#NUM!
P17858	PFKL	1.12603e+06	358095	194343	180720						1.63036	0.238532	#DIV/0!	#NUM!
Q5UIP0	RIF1										#DIV/0!	#NUM!	#DIV/0!	#NUM!
K7ELG9	LSM12	1.04012e+06	537595		547163	468953	335722				0.807874	0.709707	#DIV/0!	#NUM!
P00387	CYB5R3	1.00552e+06	304271	148498	210696		221060		155906		1.17103	0.314106	1.64057	0.225457
Q00587	CDC42EP1	845121	149247		306886	311274					0.685799	0.191838	#DIV/0!	#NUM!
Q13243	SRSF5										#DIV/0!	#NUM!	#DIV/0!	#NUM!
A0A087WV05	SRSF5	982026				139800					2.8124	#NUM!	#DIV/0!	#NUM!
B7Z2R2	UQCRB	118356				276083					-1.22196	#NUM!	#DIV/0!	#NUM!
Q16666	IFI16	514336	511156								#DIV/0!	#NUM!	#DIV/0!	#NUM!
P27348	YWHAQ										#DIV/0!	#NUM!	#DIV/0!	#NUM!
Q86X51	EZHIP	1.99659e+06	990989	961523	749133	879860	1.01358e+06	311827	417087	494025	0.579579	0.553217	1.69117	1.23945
O95793	STAU1	586405	425593	399066							#DIV/0!	#NUM!	#DIV/0!	#NUM!
Q8NBS9	TXNDC5										#DIV/0!	#NUM!	#DIV/0!	#NUM!
P27797	CALR			487158	210463	205378					1.22836	1.99827	#DIV/0!	#NUM!
Q5T5P2	KIAA1217	369270									#DIV/0!	#NUM!	#DIV/0!	#NUM!
Q49A26	GLYR1										#DIV/0!	#NUM!	#DIV/0!	#NUM!
Q9H147	DNTTIP1	452302									#DIV/0!	#NUM!	#DIV/0!	#NUM!
Q9Y5J6	DNTTIP1				416430	395978					#DIV/0!	#NUM!	#DIV/0!	#NUM!
A0A0G2JHC2	PPP1R18										#DIV/0!	#NUM!	#DIV/0!	#NUM!
Q9NXV6	CDKN2AIP										#DIV/0!	#NUM!	#DIV/0!	#NUM!
Q8N684	CPSF7										#DIV/0!	#NUM!	#DIV/0!	#NUM!
P51153	RAB13										#DIV/0!	#NUM!	#DIV/0!	#NUM!
A5YKK6	CNOT1										#DIV/0!	#NUM!	#DIV/0!	#NUM!
E7EX59	PCCB	361483	80304.4		266651	229148	135196				0.0706854	0.0299466	#DIV/0!	#NUM!
Q9Y4B6	DCAF1										#DIV/0!	#NUM!	#DIV/0!	#NUM!
P52732	KIF11										#DIV/0!	#NUM!	#DIV/0!	#NUM!
Q86UU0	BCL9L	574424	227433				162358				1.30417	0.241981	#DIV/0!	#NUM!
Q12789	GTF3C1	326895									#DIV/0!	#NUM!	#DIV/0!	#NUM!
Q7Z6Z7	HUWE1										#DIV/0!	#NUM!	#DIV/0!	#NUM!
P49257	LMAN1	479645	1.38855e+06	1.88687e+06				158105	1.2813e+06	1.11715e+06	#DIV/0!	#NUM!	0.55463	0.300141
Q14192	LMAN1	1.38819e+06	305280	673848	1.09131e+06	1.32438e+06	1.71104e+06	794471	1.57946e+06	2.01515e+06	-0.801747	0.735166	-0.890666	0.635475
O95573	ACSL3										#DIV/0!	#NUM!	#DIV/0!	#NUM!
Q10570	CPSF1	496374	166369								#DIV/0!	#NUM!	#DIV/0!	#NUM!
C9JFV4	PELP1	3.532e+06	1.96803e+06	3.57276e+06	3.6503e+06	3.99272e+06	2.64548e+06	3486434	3.05122e+06	2.18577e+06	-0.181416	0.240109	0.0566509	0.062013
D3DQV9	PELP1										#DIV/0!	#NUM!	#DIV/0!	#NUM!
Q6IAA8	LAMTOR1	636454	202993			209268					1.00409	0.170885	#DIV/0!	#NUM!
O00567	NOP56	288928	129867	104420							#DIV/0!	#NUM!	#DIV/0!	#NUM!
Q9UPU9	SAMD4A										#DIV/0!	#NUM!	#DIV/0!	#NUM!
Q13950	RUNX2	807231	177370	304338		146692					1.55036	0.268797	#DIV/0!	#NUM!
Q01196	RUNX1	353134			260193	175718					0.696182	0.500586	#DIV/0!	#NUM!
Q9NRA8	EIF4ENIF1	265872	334748		422007				207791		-0.490814	0.53741	0.531319	0.438225
P54259	ATN1	818961	469993		694499			201284			-0.107844	0.047898	1.67889	0.419072
Q15366	PCBP2	597530	410019	482772							#DIV/0!	#NUM!	#DIV/0!	#NUM!
Q9H6R4	NOL6	934385	192683		221988						1.34402	0.161856	#DIV/0!	#NUM!
H3BN98	NOL6	291077	109618		884162	504774	555076	505784	137972	612523	-1.6935	1.12005	-1.06362	0.45656
Q9P2R6	RERE	883920	190427	638018	635200	305103					0.27983	0.12431	#DIV/0!	#NUM!
P01111	NRAS	566945	251833		639374	422107	219641			609123	-0.0609005	0.0297503	-0.57326	0.223466
Q9H0U4	RAB1B		349677								#DIV/0!	#NUM!	#DIV/0!	#NUM!
Q9Y2J2	EPB41L3	858475	204097	432835	228578	156342	790982	169069			0.346771	0.142276	1.5599	0.317989
P78371	CCT2	379892									#DIV/0!	#NUM!	#DIV/0!	#NUM!
P56545	CTBP2	365371	183968		312304			169953	155700		-0.185256	0.0704212	0.754364	0.463493
P35030	PRSS3		131050			300799		238670	214677		-1.19868	#NUM!	-0.790494	0.865756
Q9UHI6	DDX20										#DIV/0!	#NUM!	#DIV/0!	#NUM!
A0A1B0GUW5	RBMS3	396495	132122		468873	451617	1395974	246087			-1.54667	0.511425	0.103055	0.0225325
P62851	RPS25	833869	413637		3.08939e+06	1.83914e+06	1.71295e+06	1.28744e+06	1.22224e+06	1.90026e+06	-1.8275	1.13297	-1.23675	1.11216
P26641	EEF1G	927078	735951		371191	273772	367777	903973	374140	389252	1.30051	2.0333	0.581205	0.485727
Q5T1Z8	PUM1	1.00072e+06		211951		312250					0.95741	0.13007	#DIV/0!	#NUM!
Q9P0L0	VAPA	1.75665e+06				569468				234145	1.62514	#NUM!	2.90735	#NUM!
P30050	RPL12	323456						277551	223421	320146	#DIV/0!	#NUM!	0.240941	0.329844
A0A087WT44	HMOX2	330509						132831			#DIV/0!	#NUM!	1.31509	#NUM!
Q9C0J8	WDR33	1.3086e+06	750454			271838					1.92116	0.441882	#DIV/0!	#NUM!
Q15717	ELAVL1										#DIV/0!	#NUM!	#DIV/0!	#NUM!
P14866	HNRNPL	356600	139998		395149	250644	206867	123228	139244	122643	-0.194929	0.117089	0.951754	0.628158
Q9UJZ1	STOML2				547749					170223	#DIV/0!	#NUM!	#DIV/0!	#NUM!
Q9Y2R4	DDX52										#DIV/0!	#NUM!	#DIV/0!	#NUM!
Q15293	RCN1	543554	388761		810008	856146	554069	546940	413081	541442	-0.666854	0.872506	-0.102517	0.155353
P62136	PPP1CA	203624	177131								#DIV/0!	#NUM!	#DIV/0!	#NUM!
P61254	RPL26				823635	217742	155036		182850		#DIV/0!	#NUM!	#DIV/0!	#NUM!
A0A590UK80	RPL26	1.65219e+06	1.2977e+06		2.1112e+06	1.8384e+06	1.24276e+06	1.22008e+06	1.33782e+06	1.34422e+06	-0.230766	0.28008	0.181365	0.512364
P08621	SNRNP70	1.61e+06	179475	444080	1.50684e+06	1.30367e+06					-0.916458	0.478964	#DIV/0!	#NUM!
Q03164	KMT2A	180477									#DIV/0!	#NUM!	#DIV/0!	#NUM!
P46776	RPL27A	452441	151246		499454	353216	237357	481230	341192	487375	-0.267528	0.150327	-0.532509	0.43189
P04181	OAT				306412	198788	263416	44337.5			#DIV/0!	#NUM!	#DIV/0!	#NUM!
P50990	CCT8										#DIV/0!	#NUM!	#DIV/0!	#NUM!
Q8N983	MRPL43	554007	110055		139215		217350				0.897152	0.247531	#DIV/0!	#NUM!
P26640	VARS1	545570									#DIV/0!	#NUM!	#DIV/0!	#NUM!
P14543	NID1										#DIV/0!	#NUM!	#DIV/0!	#NUM!
Q9H5H4	ZNF768	449752	115203		552577	573106					-0.994593	0.626514	#DIV/0!	#NUM!
P35221	CTNNA1	763940									#DIV/0!	#NUM!	#DIV/0!	#NUM!
A0A2R8YD14	RPS24	631038	174963		114178		203954	152420	155562	101222	1.34116	0.393579	1.56293	0.661815
H7C561	SF1		350957	141284	318026	332897	372629			122863	-0.471186	0.488305	1.00232	0.207364
Q9Y266	NUDC	1.02826e+06	359335		458451	341510				245477	0.794587	0.320516	1.49893	0.23604
P62316	SNRPD2	2.26241e+06	585241	670688			632404	251783	282098	713723	0.891012	0.174323	1.49573	0.599136
Q09472	EP300										#DIV/0!	#NUM!	#DIV/0!	#NUM!
A0A6Q8PH84	RAB7A		325433								#DIV/0!	#NUM!	#DIV/0!	#NUM!
A6NHB5	ZMYM3	32347.9	35329	76010.1		6547.32	3729.67		16107.6	4217.58	3.22048	0.997782	2.23663	0.86282
Q02078	MEF2A	454985									#DIV/0!	#NUM!	#DIV/0!	#NUM!
P02786	TFRC	409006						338265		339535	#DIV/0!	#NUM!	0.27126	2.0007
O00622	CCN1	2.31869e+06	1.05693e+06	2.27572e+06	303159	436472	199532				2.58915	1.6988	#DIV/0!	#NUM!
O94913	PCF11	355799	191462			116866					1.22738	0.328572	#DIV/0!	#NUM!
Q99460	PSMD1		420382	737063	266472	283726		251343			1.07292	0.708578	1.20322	0.352686
P53992	SEC24C	408060	185542								#DIV/0!	#NUM!	#DIV/0!	#NUM!
A0A024RCN4	ZSCAN26	533056	98664.4		175922	475013			65653.9		-0.0432266	0.0113309	2.26633	0.203178
Q9ULH1	ZSCAN26										#DIV/0!	#NUM!	#DIV/0!	#NUM!
A0A0C4DFM2	ZNF574										#DIV/0!	#NUM!	#DIV/0!	#NUM!
Q9H6W3	RIOX1	977742	702458	1.0313e+06	295942	733138	183608		382000	72811.4	1.16088	1.19721	1.99079	1.5149
Q9ULL0	KIAA1210				311642	203096					#DIV/0!	#NUM!	#DIV/0!	#NUM!
Q71RC2	LARP4	689284	221328	779711	429952	343190	266653	207136	182533	184146	0.701001	0.532802	1.55864	1.00815
Q96EP5	DAZAP1										#DIV/0!	#NUM!	#DIV/0!	#NUM!
Q6UUV7	CRTC3										#DIV/0!	#NUM!	#DIV/0!	#NUM!
Q9H0L4	CSTF2T										#DIV/0!	#NUM!	#DIV/0!	#NUM!
Q14116	IL18	177286									#DIV/0!	#NUM!	#DIV/0!	#NUM!
Q13148	TARDBP										#DIV/0!	#NUM!	#DIV/0!	#NUM!
E3	CHIKV E3										#DIV/0!	#NUM!	#DIV/0!	#NUM!
O60732	MAGEC1	345235	287829								#DIV/0!	#NUM!	#DIV/0!	#NUM!
Q10471	GALNT2										#DIV/0!	#NUM!	#DIV/0!	#NUM!
Q6SJ96	TBPL2										#DIV/0!	#NUM!	#DIV/0!	#NUM!
P07814	EPRS1	646002	490954		383817	333689	127751	172303	307799	231770	1.01268	1.04213	1.26045	1.63863
Q86Y91	KIF18B										#DIV/0!	#NUM!	#DIV/0!	#NUM!
P17812	CTPS1	936793	213799		201660			147170	153743		1.51238	0.182112	1.93496	0.442629
A0A6Q8PHA2	INF2	394792	129514								#DIV/0!	#NUM!	#DIV/0!	#NUM!
Q15652	JMJD1C										#DIV/0!	#NUM!	#DIV/0!	#NUM!
P57740	NUP107		588476								#DIV/0!	#NUM!	#DIV/0!	#NUM!
Q9UBU9	NXF1	531741	286824	196682	467637	447187	308161		338144	330324	-0.268576	0.244376	0.0179377	0.0104496
Q15428	SF3A2					351416		215715	363646	391083	#DIV/0!	#NUM!	#DIV/0!	#NUM!
Q92575	UBXN4	217847	180685	103711	39450	5645.38	56074.9			50832.4	2.3116	1.65787	1.7196	0.647829
E7EQZ4	SMN1										#DIV/0!	#NUM!	#DIV/0!	#NUM!
A6NEM2	HCFC1	413809	1.04924e+06						1.67197e+06		#DIV/0!	#NUM!	-1.19257	0.472316
Q93074	HCFC1										#DIV/0!	#NUM!	#DIV/0!	#NUM!
P62273	RPS29			327906	2.49912e+06	2150538	1.6691e+06	1.2122e+06	682473	1.34459e+06	-2.68332	1.18005	-1.71935	0.689912
A0A0C4DG89	DDX46	335019	199943		117431		168671	215035	239314	250275	0.902903	0.643773	0.187544	0.239708
P52948	NUP98	561740	244550		127012					221852	1.66634	0.302477	0.861701	0.201611
I3L4Q0	MCRIP1	791417	506710	821927	284542	367079	426649				0.975382	1.483	#DIV/0!	#NUM!
P31040	SDHA				242198	167957					#DIV/0!	#NUM!	#DIV/0!	#NUM!
Q7Z7F7	MRPL55				240784	405824					#DIV/0!	#NUM!	#DIV/0!	#NUM!
Q9BWW4	SSBP3	658223	105400								#DIV/0!	#NUM!	#DIV/0!	#NUM!
Q68CP9	ARID2	685281	229519			80299.3				58721.5	2.51	0.288602	2.9615	0.303811
Q14533	KRT81										#DIV/0!	#NUM!	#DIV/0!	#NUM!
O60220	KRT81				918265	580132					#DIV/0!	#NUM!	#DIV/0!	#NUM!
I3L1D4	RBFOX1	463222	2.88912e+06	1.38973e+06	446915	461868	2.78824e+06	298306	1.78769e+06	4.4576e+06	0.359151	0.120925	-0.464567	0.160202
F8WAR4	CHCHD3	117972	54932.1		124197	262189	1.12262e+06	93836.1	127890	115016	-2.54059	0.422173	-0.376709	0.391247
E7ES60	RAB34	116727	217015								#DIV/0!	#NUM!	#DIV/0!	#NUM!
G3V2S9	SLIRP	1969579	863431	1.21693e+06	1741486	1.43933e+06	1.2819e+06	1.22982e+06	1.42041e+06	1.79971e+06	-0.140022	0.144769	-0.135882	0.133986
I3L1Q2	SLIRP	312447	83169.3								#DIV/0!	#NUM!	#DIV/0!	#NUM!
Q8N7H5	PAF1	219616	236823								#DIV/0!	#NUM!	#DIV/0!	#NUM!
O75477	ERLIN1	261360			358566	367241	276595		502904	263049	-0.354389	0.47525	-0.551219	0.178619
Q92947	GCDH	241409	108959		278583				150485		-0.669241	0.273298	0.219253	0.0629939
A0A5F9ZI21	ARHGEF2	263715				165098					0.675656	#NUM!	#DIV/0!	#NUM!
Q96HS1	PGAM5	532939	147164		498134	356980	184080	86083.5	81324.5		-0.0266761	0.0110582	2.02239	0.501392
Q8WXH0	SYNE2	1.42796e+06	357360		816512		310967		287070	271360	0.663081	0.19769	1.67673	0.431255
Q7LBC6	KDM3B										#DIV/0!	#NUM!	#DIV/0!	#NUM!
Q8NI77	KIF18A	249269									#DIV/0!	#NUM!	#DIV/0!	#NUM!
Q86U86	PBRM1	248956	186185								#DIV/0!	#NUM!	#DIV/0!	#NUM!
A0A7P0TAE9	CANX	1.09326e+06	367663		259526	204986		187890	117850	176020	1.65309	0.516591	2.18546	0.896138
O60884	DNAJA2										#DIV/0!	#NUM!	#DIV/0!	#NUM!
Q5T5S1	CCDC183										#DIV/0!	#NUM!	#DIV/0!	#NUM!
P33992	MCM5	334242				91872.5				115780	1.86319	#NUM!	1.5295	#NUM!
P05412	JUN	243459									#DIV/0!	#NUM!	#DIV/0!	#NUM!
P33176	KIF5B				224487	193979					#DIV/0!	#NUM!	#DIV/0!	#NUM!
A0A0A0MR39	MYEF2	432134		265219	213311						0.708932	0.283257	#DIV/0!	#NUM!
Q9Y3D9	MRPS23	226341	105198		434768	348226	240333		171685	211806	-1.04105	0.877244	-0.210011	0.140638
M0R2L9	RPS19				539959	451856					#DIV/0!	#NUM!	#DIV/0!	#NUM!
Q9UKV3	ACIN1										#DIV/0!	#NUM!	#DIV/0!	#NUM!
Q13200	PSMD2	1.62207e+06	1.08333e+06		995221	395566	286396	510865	186100	658671	1.27476	0.970632	1.58184	1.35248
Q14814	MEF2D	311520			189348	83007.1			101026		1.19384	0.511614	1.6246	#NUM!
Q9GZL7	WDR12				384274	287916					#DIV/0!	#NUM!	#DIV/0!	#NUM!
Q15007	WTAP										#DIV/0!	#NUM!	#DIV/0!	#NUM!
A0A7I2YQE1	KPNA2		315148	321545				148064			#DIV/0!	#NUM!	1.10437	1.68392
P13995	MTHFD2			478849	387801	484897	113806	125841	192352		0.542208	0.244729	1.58967	0.945142
A0A7I2V3S3	EIF3E										#DIV/0!	#NUM!	#DIV/0!	#NUM!
Q9Y467	SALL2	219649			139112						0.658959	#NUM!	#DIV/0!	#NUM!
P55081	MFAP1										#DIV/0!	#NUM!	#DIV/0!	#NUM!
O43390	HNRNPR										#DIV/0!	#NUM!	#DIV/0!	#NUM!
O00267	SUPT5H										#DIV/0!	#NUM!	#DIV/0!	#NUM!
P35268	RPL22				428919			244383			#DIV/0!	#NUM!	#DIV/0!	#NUM!
Q86YV5	PRAG1										#DIV/0!	#NUM!	#DIV/0!	#NUM!
Q02930	CREB5	376481	102861	311398	269531	198003				214687	0.173169	0.0949341	0.296007	0.0996411
P53618	COPB1	805348	263501	310876		211305	361143				0.684203	0.295884	#DIV/0!	#NUM!
P50402	EMD										#DIV/0!	#NUM!	#DIV/0!	#NUM!
P0C263	SBK2										#DIV/0!	#NUM!	#DIV/0!	#NUM!
Q9UKX3	MYH13	1.18156e+06	431688					791260		219750	#DIV/0!	#NUM!	0.674169	0.230347
Q9BRL6	SRSF8	753882				812726					-0.108431	#NUM!	#DIV/0!	#NUM!
Q8NBJ5	COLGALT1				382137	124516	110313	268098	107920		#DIV/0!	#NUM!	#DIV/0!	#NUM!
Q96QC0	PPP1R10	402874				143456					1.48972	#NUM!	#DIV/0!	#NUM!
Q7Z6B7	SRGAP1										#DIV/0!	#NUM!	#DIV/0!	#NUM!
P18858	LIG1	260761	217838		139923						0.774185	0.642311	#DIV/0!	#NUM!
Q92804	TAF15	228816			634011	489693					-1.296	0.641002	#DIV/0!	#NUM!
Q8IYH5	ZZZ3										#DIV/0!	#NUM!	#DIV/0!	#NUM!
Q8N1G0	ZNF687	439835	228892								#DIV/0!	#NUM!	#DIV/0!	#NUM!
P51116	FXR2				287880						#DIV/0!	#NUM!	#DIV/0!	#NUM!
Q9NX40	OCIAD1				275280	433982					#DIV/0!	#NUM!	#DIV/0!	#NUM!
Q01780	EXOSC10	189816		615341							#DIV/0!	#NUM!	#DIV/0!	#NUM!
Q9NQW6	ANLN	262726									#DIV/0!	#NUM!	#DIV/0!	#NUM!
Q7Z5L9	IRF2BP2				215415						#DIV/0!	#NUM!	#DIV/0!	#NUM!
P61586	RHOA	523183	190174		358614	197439					0.359402	0.147472	#DIV/0!	#NUM!
O15371	EIF3D										#DIV/0!	#NUM!	#DIV/0!	#NUM!
P35611	ADD1	503356									#DIV/0!	#NUM!	#DIV/0!	#NUM!
O00483	NDUFA4										#DIV/0!	#NUM!	#DIV/0!	#NUM!
Q9H3N1	TMX1	2259713	1.22946e+06	2.21011e+06	583767	899257	558022	1.67446e+06	1.41568e+06	1.5332e+06	1.48147	1.58611	0.301844	0.449005
P46781	RPS9	727244	409267	73941.8	567208	660476	73094.8	698895	672600	575510	-0.103828	0.0389878	-0.68571	0.567356
Q9UNF0	RPS9	181565			193454	219464					-0.18537	0.329544	#DIV/0!	#NUM!
Q6KC79	NIPBL	564867	277958		391156	224698	276394	107790			0.50275	0.406477	1.96701	0.370042
Q9P2B4	CTTNBP2NL										#DIV/0!	#NUM!	#DIV/0!	#NUM!
P08134	RHOC	351395	164426		211270	124792	82237.9	76945.3	99788.5	99142.9	0.887296	0.587541	1.48781	1.00219
Q96MX3	ZNF48										#DIV/0!	#NUM!	#DIV/0!	#NUM!
P09669	COX6C		341729		569679			254314			-0.737295	#NUM!	0.426243	#NUM!
Q9NW64	RBM22										#DIV/0!	#NUM!	#DIV/0!	#NUM!
Q92900	UPF1	371820	272415	446450							#DIV/0!	#NUM!	#DIV/0!	#NUM!
Q99590	SCAF11	264051	161913	976711	367351	209213	241424				0.778028	0.304178	#DIV/0!	#NUM!
Q01518	CAP1										#DIV/0!	#NUM!	#DIV/0!	#NUM!
Q53ET0	CRTC2	915208		1931571		1.18266e+06	6913218				-1.50786	0.33508	#DIV/0!	#NUM!
O15047	SETD1A										#DIV/0!	#NUM!	#DIV/0!	#NUM!
Q9BWF3	RBM4	350324			317244	349106	435048	357379	634794	578546	-0.0676101	0.0791231	-0.5797	0.383147
Q9Y625	GPC6										#DIV/0!	#NUM!	#DIV/0!	#NUM!
Q9NP66	HMG20A					80915.1	186166				#DIV/0!	#NUM!	#DIV/0!	#NUM!
P53803	HMG20A										#DIV/0!	#NUM!	#DIV/0!	#NUM!
Q13409	DYNC1I2	182729				58420.4					1.64516	#NUM!	#DIV/0!	#NUM!
A0A7I2V3L8	NDUFA5	732463			467349	365954	276005	126925			0.986131	1.08795	2.52878	#NUM!
A0A0D9SGF6	SPTAN1	215921	161680	218703	107621		197127	100664			0.383472	0.467491	0.981541	0.926986
Q04721	NOTCH2	8.9234e+06	1.16823e+06	1.83733e+06	875628	540995		2.35329e+06	3.30053e+06	5.85139e+06	2.48898	0.416785	0.0521802	0.0174258
Q9H3S7	PTPN23										#DIV/0!	#NUM!	#DIV/0!	#NUM!
Q29RF7	PDS5A	345560	143146	289834							#DIV/0!	#NUM!	#DIV/0!	#NUM!
J3KQE5	RAN	1.09167e+06	645942	1.38472e+06	1.15797e+06	1.27013e+06	609811	766899		1.40002e+06	0.0395491	0.0320423	-0.057985	0.0390148
Q8N0Z8	PUSL1	683051		113942		118242					1.75283	0.173376	#DIV/0!	#NUM!
O15027	SEC16A	4.89202e+06	1.05987e+06		2.67093e+06	1.62384e+06					0.47077	0.144426	#DIV/0!	#NUM!
Q9ULD9	ZNF608	391774	257660		394520	541057	389204				-0.443538	0.608164	#DIV/0!	#NUM!
P17480	UBTF				286674	118307					#DIV/0!	#NUM!	#DIV/0!	#NUM!
P56385	ATP5ME	482601		916389	547548	603310		248969			0.281677	0.202269	1.49035	0.354108
P50213	IDH3A	475300	199753		202855	188010		124128	133773	173923	0.788331	0.385816	1.22952	0.792648
Q96A35	MRPL24				196097	147616					#DIV/0!	#NUM!	#DIV/0!	#NUM!
Q9Y5B0	MRPL24	298804	168401	286490							#DIV/0!	#NUM!	#DIV/0!	#NUM!
Q8WUM0	NUP133										#DIV/0!	#NUM!	#DIV/0!	#NUM!
Q07812	BAX		417844								#DIV/0!	#NUM!	#DIV/0!	#NUM!
A0A1C7CYX1	MIDEAS										#DIV/0!	#NUM!	#DIV/0!	#NUM!
Q8TF72	SHROOM3										#DIV/0!	#NUM!	#DIV/0!	#NUM!
P43246	MSH2										#DIV/0!	#NUM!	#DIV/0!	#NUM!
Q99567	NUP88										#DIV/0!	#NUM!	#DIV/0!	#NUM!
O43251	RBFOX2	723829			439536	268176					1.03249	0.614664	#DIV/0!	#NUM!
Q8TDM6	DLG5	271583	210484								#DIV/0!	#NUM!	#DIV/0!	#NUM!
P62879	GNB2	295638									#DIV/0!	#NUM!	#DIV/0!	#NUM!
Q15393	SF3B3	672178	417865	366313							#DIV/0!	#NUM!	#DIV/0!	#NUM!
P98160	HSPG2	175673		191807				146720	143298		#DIV/0!	#NUM!	0.341521	1.37192
Q08397	LOXL1										#DIV/0!	#NUM!	#DIV/0!	#NUM!
B7ZM99	MTHFD1L										#DIV/0!	#NUM!	#DIV/0!	#NUM!
Q9P2W9	STX18	284281	96379.6					58715.5			#DIV/0!	#NUM!	1.69669	0.246384
Q14165	MLEC	314144	177863		132229	101136	155919	154287	110013	179066	0.922824	0.907048	0.735146	0.735515
Q7Z6E9	RBBP6										#DIV/0!	#NUM!	#DIV/0!	#NUM!
Q5VUA4	ZNF318	517300	353196	374280	425677	351581					0.0944599	0.131157	#DIV/0!	#NUM!
Q08379	GOLGA2										#DIV/0!	#NUM!	#DIV/0!	#NUM!
Q92541	RTF1										#DIV/0!	#NUM!	#DIV/0!	#NUM!
P62995	TRA2B										#DIV/0!	#NUM!	#DIV/0!	#NUM!
P17987	TCP1										#DIV/0!	#NUM!	#DIV/0!	#NUM!
Q96AY3	FKBP10										#DIV/0!	#NUM!	#DIV/0!	#NUM!
Q15003	NCAPH										#DIV/0!	#NUM!	#DIV/0!	#NUM!
P43361	MAGEA8										#DIV/0!	#NUM!	#DIV/0!	#NUM!
Q86WI3	NLRC5	3.15296e+07	7.93336e+07	9.67052e+07	106739911	79798104	171476037	1.11875e+08	1.20637e+08	1.35122e+08	-0.78643	0.683336	-0.824684	1.21948
H0YC42	NLRC5	686073	185738					375051	420964	443015	#DIV/0!	#NUM!	0.077838	0.040536
O95433		205223	204778								#DIV/0!	#NUM!
A0A0B4J203	AHSA1										#DIV/0!	#NUM!
Q9C0C7	AMBRA1	284995	206840								#DIV/0!	#NUM!
Q9P266	JCAD										#DIV/0!	#NUM!
Q07954	LRP1										#DIV/0!	#NUM!
A0A087WZN1	IDH3B	342162						159525		267814	#DIV/0!	#NUM!
Q68EM7	ARHGAP17										#DIV/0!	#NUM!
Q14789	GOLGB1										#DIV/0!	#NUM!
Q9Y3B7	MRPL11				610806			198641			#DIV/0!	#NUM!
O00566	MPHOSPH10										#DIV/0!	#NUM!
O00411	POLRMT	324052									#DIV/0!	#NUM!
Q99536	VAT1	865002	699194		309285	273824	223459	218495	339505	240591	1.54052	2.28676
Q9UHD8	SEPTIN9	863572				316616					1.44758	#NUM!
Q92616	GCN1										#DIV/0!	#NUM!
E7ERK9	EIF2B4										#DIV/0!	#NUM!
Q9BPX3	NCAPG	297540		395710		42500.1		97083.8	110370		3.02784	0.76061
O00291	HIP1	549090	277407					149362			#DIV/0!	#NUM!
Q96G23	CERS2										#DIV/0!	#NUM!
P39656	DDOST	486666	428940		197964	137722		354255	303678	333161	1.44762	1.69728
O94925	GLS										#DIV/0!	#NUM!
P13639	EEF2	175469									#DIV/0!	#NUM!
O95197	RTN3	357245									#DIV/0!	#NUM!
P63010	AP2B1	301378	134364					79791.5	69895.7		#DIV/0!	#NUM!
Q14257	RCN2										#DIV/0!	#NUM!
A6NIZ1	RCN2		210103					296459		293192	#DIV/0!	#NUM!
Q02809	PLOD1										#DIV/0!	#NUM!
P62917	RPL8	833430	348651		614287	408451	472196	274061		178795	0.246209	0.173951
Q99614	TTC1	347811	119801			98122					1.25266	0.209906
Q9UMN6	KMT2B										#DIV/0!	#NUM!
Q7KZF4	SND1			212205	325785					246574	-0.618463	#NUM!
Q8TBC3	SHKBP1										#DIV/0!	#NUM!
Q14318	FKBP8										#DIV/0!	#NUM!
Q9Y6W5	WASF2	149995	184314		319260	292292	100806		38099.6		-0.506457	0.309482
P55072	VCP										#DIV/0!	#NUM!
O15173	PGRMC2										#DIV/0!	#NUM!
Q9Y5S2	CDC42BPB	178464									#DIV/0!	#NUM!
P50548	ERF										#DIV/0!	#NUM!
Q14686	NCOA6										#DIV/0!	#NUM!
O94761	RECQL4	436025			373671	412012					0.150463	0.379548
Q8WXX7	AUTS2	345574	178303								#DIV/0!	#NUM!
A0A0A0MRM9	NOLC1	578612	151142								#DIV/0!	#NUM!
A0A499FJK2	TGFB1				283350						#DIV/0!	#NUM!
Q9NWZ5	UCKL1	202407									#DIV/0!	#NUM!
Q12904	AIMP1										#DIV/0!	#NUM!
H3BNC9	AIMP1										#DIV/0!	#NUM!
P62140	PPP1CB										#DIV/0!	#NUM!
O00217	NDUFS8	552167	525197	143425	72901	87243.8	88465.5	84198.4	77004.9	74835.4	2.29586	1.15382
Q5EBL8	PDZD11	436538	198925								#DIV/0!	#NUM!
Q7Z7H5	TMED4										#DIV/0!	#NUM!
Q02413	DSG1			112954						190613	#DIV/0!	#NUM!
P50336	PPOX										#DIV/0!	#NUM!
Q13868	EXOSC2				261960						#DIV/0!	#NUM!
O95864	FADS2	419224	313997			174562					1.07051	0.549666
A0A2R8YH03	TASOR2	201233	186828								#DIV/0!	#NUM!
Q92973	TNPO1										#DIV/0!	#NUM!
Q92783	STAM										#DIV/0!	#NUM!
P05067	APP										#DIV/0!	#NUM!
P14678	SNRPB	1.62662e+06	609688	1.37956e+06	1.49819e+06	1.21168e+06	999580	701977	575769	585765	-0.0368594	0.0310354
I3NI02	GOSR2										#DIV/0!	#NUM!
Q9NRX2	MRPL17				294120	285009					#DIV/0!	#NUM!
Q9GZS1	POLR1E										#DIV/0!	#NUM!
P48449	LSS	683444									#DIV/0!	#NUM!
Q9P2N6	KANSL3	195142	80235.2								#DIV/0!	#NUM!
Q96F07	CYFIP2	524348	263255								#DIV/0!	#NUM!
Q9NVP1	DDX18	117032	170090								#DIV/0!	#NUM!
Q8WUW1	BRK1	328427	131292			150060					0.615209	0.141678
O43681	GET3	449158	210979								#DIV/0!	#NUM!
Q8ND71	GIMAP8		2.03821e+06	1.28582e+06	201065	304546	2.74806e+06	903086	732063	597823	0.615827	0.194507
B7Z4C8	RPL31										#DIV/0!	#NUM!
Q9H944	RPL31	171669		1.03586e+06							#DIV/0!	#NUM!
Q86Y56	DNAAF5	241926	84443.9								#DIV/0!	#NUM!
Q9Y240	CLEC11A										#DIV/0!	#NUM!
Q9NPE3	NOP10	335450	124448		176169	111866					0.675073	0.286128
P49756	RBM25	125623	75313.2				41143.2			51824.3	1.28801	0.394403
Q13423	NNT	381249	154146		277476	209626	119409		124706	168452	0.405034	0.243606
Q9Y2A7	NCKAP1	496864	229180		248224						0.548414	0.150407
O43684	BUB3	359379			240123	138059					0.926423	0.515982
Q8N2S1	LTBP4										#DIV/0!	#NUM!
Q9HDC9	APMAP	512878	501994			141527		282250	326606	289774	1.84215	1.78524
P55884	EIF3B										#DIV/0!	#NUM!
Q14203	DCTN1	265865	79995.3		139830						0.306518	0.0600372
O96000	DCTN1										#DIV/0!	#NUM!
Q13561	DCTN2										#DIV/0!	#NUM!
Q8TEW0	PARD3	255402	108773		148320						0.295921	0.0785534
Q9ULX6	AKAP8L										#DIV/0!	#NUM!
P49368	CCT3		137372		152102						-0.146951	#NUM!
Q9UK61	TASOR										#DIV/0!	#NUM!
F8W930	IGF2BP2										#DIV/0!	#NUM!
O15119	TBX3										#DIV/0!	#NUM!
O15482	TEX28										#DIV/0!	#NUM!
Q00325	SLC25A3										#DIV/0!	#NUM!
A0A2R8YDH4	SLC25A3	362382				119408					1.60161	#NUM!
Q96F45	ZNF503				353621	196726					#DIV/0!	#NUM!
O60573	EIF4E2										#DIV/0!	#NUM!
P54136	RARS1	486998	275194			100667			153206		1.92057	0.433254
O14828	SCAMP3										#DIV/0!	#NUM!
Q96JM2	ZNF462	308632			87327.3						1.82138	#NUM!
P18124	RPL7										#DIV/0!	#NUM!
Q8WVC0	LEO1	476516	222500								#DIV/0!	#NUM!
Q9P2Y4	ZNF219	364975									#DIV/0!	#NUM!
P22314	UBA1										#DIV/0!	#NUM!
A0A590UJD9	DLG1	329825	111781			221830	140183	104401		195801	0.286717	0.116314
Q96Q89	KIF20B	16559340	24086860	5.50184e+06	24196262	28858500	23116380	23136414	27226574	18058534	-0.722975	0.816061
Q92576	PHF3	250767	207338		215998		274967				-0.0999409	0.156401
Q9H4A3	WNK1										#DIV/0!	#NUM!
Q86VS3	IQCH										#DIV/0!	#NUM!
O95983	MBD3										#DIV/0!	#NUM!
A0A0A0MTH3	ILK										#DIV/0!	#NUM!
Q9BXS5	AP1M1	443879		273351							#DIV/0!	#NUM!
Q9BRK5	SDF4	120190	127307	424153		482639		253097	195021	183602	-1.1082	0.487342
Q49A88	CCDC14	404836	164947								#DIV/0!	#NUM!
Q2TAM9	TUSC1	132415	66876.6								#DIV/0!	#NUM!
P62875	TUSC1	302574			242126	246594	245033				0.306957	2.69186
J3QRS3	MYL12A										#DIV/0!	#NUM!
Q01813	PFKP	876774	383957	814743	161572	103487		84433.8	108129	76167.6	2.38409	1.16096
Q9UET6	FTSJ1										#DIV/0!	#NUM!
O95628	CNOT4	354305	71491.6			225502	91081.3				0.427578	0.118871
P62891	RPL39	250263						155844		165464	#DIV/0!	#NUM!
Q8IWZ3	ANKHD1										#DIV/0!	#NUM!
O95684	CEP43										#DIV/0!	#NUM!
O95347	SMC2	199720	209152						119022		#DIV/0!	#NUM!
Q7Z417	NUFIP2	261380			226765	104680					0.657382	0.274244
P47755	CAPZA2										#DIV/0!	#NUM!
Q6PL18	ATAD2										#DIV/0!	#NUM!
P11277	SPTB										#DIV/0!	#NUM!
Q14739	LBR										#DIV/0!	#NUM!
Q8IZF2	ADGRF5										#DIV/0!	#NUM!
Q15532	SS18	297777		399026	109078						1.67539	0.650569
P62304	SNRPE										#DIV/0!	#NUM!
P61981	YWHAG										#DIV/0!	#NUM!
Q9Y5Q8	GTF3C5										#DIV/0!	#NUM!
Q9NRG0	CHRAC1	452714	212025		233070	92599			159239		1.02938	0.45865
Q9Y6C9	MTCH2	249352	236085								#DIV/0!	#NUM!
A6NFI3	ZNF316										#DIV/0!	#NUM!
Q15417	CNN3	523062	246280		292485	290872	220773		151321	273339	0.521157	0.446562
Q9Y6D9	MAD1L1	368171									#DIV/0!	#NUM!
Q8TDR0	TRAF3IP1				193484	174755		153074	191503	150245	#DIV/0!	#NUM!
O15226	NKRF										#DIV/0!	#NUM!
Q9UEG4	ZNF629										#DIV/0!	#NUM!
Q96DA6	DNAJC19										#DIV/0!	#NUM!
P07996	THBS1				263296	140715					#DIV/0!	#NUM!
R4GMQ1	KDM1A	205733	203678								#DIV/0!	#NUM!
E7ETY2	TCOF1										#DIV/0!	#NUM!
Q13425	SNTB2										#DIV/0!	#NUM!
A0A2R8Y7X9	SNTB2	500428									#DIV/0!	#NUM!
Q04941	PLP2										#DIV/0!	#NUM!
Q92896	GLG1										#DIV/0!	#NUM!
Q9NPD3	EXOSC4										#DIV/0!	#NUM!
Q9BX66	SORBS1	273416	114740		156737	147471	133093	83769	134266	122751	0.412976	0.320334
Q9ULH0	KIDINS220		460839		13850611	13041004					-4.86675	1.46417
Q9BQ39	DDX50										#DIV/0!	#NUM!
Q9BZF9	DDX50	1.11012e+08	7.88398e+07	92434623	132382765	1.74618e+08	1.28604e+08	1.06693e+08	1.4295e+08	1.27165e+08	-0.625862	1.3647
Q14008	CKAP5										#DIV/0!	#NUM!
Q16537	CKAP5	16208413	9204958		21936196	23672482	12262324	18565500	13921303	16026786	-0.60229	0.522247
Q8WTU2	SSC4D										#DIV/0!	#NUM!
Q15942	ZYX		512994		633420	706793					-0.385447	0.611418
P35249	RFC4										#DIV/0!	#NUM!
J3KSJ5	CYBC1										#DIV/0!	#NUM!
Q96RN5	CYBC1			638543							#DIV/0!	#NUM!
Q9NTI5	PDS5B	278107									#DIV/0!	#NUM!
P08240	SRPRA										#DIV/0!	#NUM!
Q9H9S5	FKRP	1.1157e+06	404783		982449	326035	909605	627573	799318	428259	0.0401749	0.0180388
Q8N1W1	ARHGEF28	47742.3	35515.3	68574.7							#DIV/0!	#NUM!
P0C7P0	CISD3	140335		78339.6	259363	64211.9	202168				-0.68061	0.335793
Q9ULJ6	ZMIZ1	527422	396340								#DIV/0!	#NUM!
H0Y4R1	IMPDH2										#DIV/0!	#NUM!
Q8TED1	GPX8										#DIV/0!	#NUM!
P41252	IARS1										#DIV/0!	#NUM!
P49406	MRPL19										#DIV/0!	#NUM!
Q96QR8	PURB										#DIV/0!	#NUM!
D6RCF4	CISD2	195375	97565		138085			127930	126672		0.0850479	0.0281742
Q53EZ4	CEP55	5.59864e+06	4.18471e+06	6.85482e+06	10386417	14286156	10355582	8.25527e+06	10630830	10609738	-1.07402	1.8081
Q06033	ITIH3										#DIV/0!	#NUM!
A0A0A0MT64	FDXR				202194	267737		92471.2	123296	146342	#DIV/0!	#NUM!
Q96HQ2	CDKN2AIPNL	177355									#DIV/0!	#NUM!
A0A0A0MT33	SCAF8	233744	127486	575421		189689	241627	69397.6	78840.6	203913	0.533802	0.207226
O94906	PRPF6										#DIV/0!	#NUM!
E7ESW6	WDR87	298358	159365	370165	648785	970002	424173	503563	619949	453917	-1.30315	1.12013
P02511	CRYAB										#DIV/0!	#NUM!
Q10567	AP1B1										#DIV/0!	#NUM!
A3KMH1	VWA8										#DIV/0!	#NUM!
Q16531	DDB1										#DIV/0!	#NUM!
Q9UHF7	TRPS1										#DIV/0!	#NUM!
P62081	RPS7				187331				282225		#DIV/0!	#NUM!
Q15465	SHH	1.19828e+06	1289821	1.42285e+06	2.02459e+06	2.04326e+06	2.02653e+06	152776	1.03966e+06	1.29653e+06	-0.639959	3.42946
P14854	COX6B1										#DIV/0!	#NUM!
A0A1B0GW41	ING5				407039						#DIV/0!	#NUM!
A0A087X080	RYR3	325726									#DIV/0!	#NUM!
Q9H019	MTFR1L	170413					119174				0.515967	#NUM!
Q99832	CCT7				341784	322041		148571		162425	#DIV/0!	#NUM!
Q8IWI9	MGA										#DIV/0!	#NUM!
Q9BXP5	SRRT										#DIV/0!	#NUM!
P11441	UBL4A										#DIV/0!	#NUM!
P51571	SSR4										#DIV/0!	#NUM!
Q8TDX9	PKD1L1										#DIV/0!	#NUM!
H7BXH9	METTL21A	50074.9	65897.2		3724.24	3608.47	2723.7	22810.4	12041.3	15789.5	4.11255	2.57203
Q9Y4W2	LAS1L										#DIV/0!	#NUM!
Q86XI2	NCAPG2										#DIV/0!	#NUM!
A0A0G2JNT7	KANSL1	210080	86843.9								#DIV/0!	#NUM!
Q8IZH2	XRN1	178644	122185	555824							#DIV/0!	#NUM!
O43660	PLRG1										#DIV/0!	#NUM!
Q96BT3	CENPT	345417	216747		84300.6	85461.1					1.72748	1.03244
Q96G28	CFAP36	1.35467e+06	152254		786886	521954	282272	230523	297698	319934	0.506533	0.169137
Q86TV6	TTC7B	678627	415788	806345	736313	749369	800923	555929	985936	691576	-0.266631	0.478742
Q9BW27	NUP85		306502	1.42318e+06			85112.7				3.34498	0.245639
A0A0D9SFE4	DNM1	163211	347412								#DIV/0!	#NUM!
A0A087WW40	SH3GLB1										#DIV/0!	#NUM!
O95292	VAPB	256571	291837			158590	209341		165033		0.575814	1.00008
Q9ULU4	ZMYND8										#DIV/0!	#NUM!
P46939	UTRN	174656	122572		328947	202644	251276				-0.812237	0.934592
Q99470	SDF2										#DIV/0!	#NUM!
B4DH95	GIMAP6										#DIV/0!	#NUM!
A0A1C7CYX9	DPYSL2										#DIV/0!	#NUM!
Q8NBX0	SCCPDH										#DIV/0!	#NUM!
Q6ZRI8	ARHGAP36	3.57492e+07	497800	175589	2.07032e+07	1.05371e+07	1.04043e+07	3.54472e+06	2.37855e+06	3.88253e+06	-0.193293	0.0485668
C9JJ19	MRPS34										#DIV/0!	#NUM!
Q02388	COL7A1	1.06079e+06	1.16853e+06			2.74565e+06				3.36442e+06	-1.30054	1.43914
Q5TGY3	AHDC1										#DIV/0!	#NUM!
Q86YJ7	ANKRD13B	224563	339617		383870	591833	451422	473853	448405	347256	-0.753923	0.919294
Q8TER5	ARHGEF40	296014	146476	1.18518e+06							#DIV/0!	#NUM!
K7ERP1	ROGDI		232910						827760		#DIV/0!	#NUM!
P55735	SEC13	133156	64198.1	18706.1				6743.49	7446.77	5847.4	#DIV/0!	#NUM!
Q9NPH3	IL1RAP	196808									#DIV/0!	#NUM!
Q13123	IK										#DIV/0!	#NUM!
A0A7P0T915	SIRT5										#DIV/0!	#NUM!
P30101	PDIA3										#DIV/0!	#NUM!
A0A7P0Z4P5	SLC3A2										#DIV/0!	#NUM!
O15018	PDZD2										#DIV/0!	#NUM!
O75962	TRIO										#DIV/0!	#NUM!
Q86V48	LUZP1										#DIV/0!	#NUM!
Q96JM4	LRRIQ1	108687	13916.2	202052				2650.5			#DIV/0!	#NUM!
Q1A5X6	IQCJ						87303.1	102305	101722	104347	#DIV/0!	#NUM!
A0A0A0MS79	NCKAP5	1.92543e+06	3.79861e+06	844798	3.8653e+06	4986989	5010846	4046612	3.58288e+06	2.53938e+06	-1.07754	1.21287
O60306	AQR										#DIV/0!	#NUM!
F5H2B5	PLD4										#DIV/0!	#NUM!
O95487	SEC24B		179197								#DIV/0!	#NUM!
Q96EV2	RBM33										#DIV/0!	#NUM!
Q7L0Y3	TRMT10C										#DIV/0!	#NUM!
A0A0B4J2E5	LOC102724159	139450	104847			145860	149230	119525	158597	114863	-0.272513	0.550534
Q9P0J1	PDP1										#DIV/0!	#NUM!
Q9Y678	COPG1										#DIV/0!	#NUM!
Q9BYW2	SETD2	175952	103810			132397	114987	199885	85578	80667.3	0.177448	0.151684
Q8NEZ4	KMT2C		605690								#DIV/0!	#NUM!
Q9UMX1	SUFU										#DIV/0!	#NUM!
A0A1W2PNV4	SUFU	276265	2.18152e+06	3.41313e+06	961958	1.3035e+06	4.7444e+06	3326028	4386680	3286780	-0.255799	0.0891969
O95932	TGM6	600386	227575		531818	445705		429112	219848	397062	-0.239567	0.134544
Q13797	ITGA9										#DIV/0!	#NUM!
Q13952	NFYC										#DIV/0!	#NUM!
Q9UBS4	DNAJB11	421294			636586	371603	211971	749495		250389	0.0507916	0.0184423
J3KNZ9	FBRS	335175	116286								#DIV/0!	#NUM!
Q86VD9	PIGZ										#DIV/0!	#NUM!
O15355	PPM1G										#DIV/0!	#NUM!
A6NLP5	TTC36										#DIV/0!	#NUM!
Q9Y6L7	TLL2				234985	170371	764790		376604	607657	#DIV/0!	#NUM!
Q9H6D7	HAUS4	403424	252723		377825	355648	394848	461961	437397	504295	-0.197124	0.32919
P48960	ADGRE5										#DIV/0!	#NUM!
Q96RR4	CAMKK2	469106	412470		489068	301144	432745	2.34868e+06	2.10644e+06	2268471	0.112745	0.16227
Q7Z6K1	THAP5	557580	452491		1.83199e+06	1.56886e+06	937461	1.13725e+06	895355	907215	-1.51771	1.14252
Q8TEQ6	GEMIN5	253025	225006	254564					57416.6	119897	#DIV/0!	#NUM!
Q96JM3	CHAMP1	438479	253062								#DIV/0!	#NUM!
Q9HAF1	MEAF6										#DIV/0!	#NUM!
Q6ZVF9	GPRIN3		594602	351587	1.758e+06			495786	400074	582775	-1.89373	0.985664
A0A0D9SFB5	ADH4		1.46816e+06	902511	485464	1.01469e+06	1.01739e+06	1.39681e+06	950109	1867512	0.498236	0.46025
G5EA03	LIMCH1										#DIV/0!	#NUM!
Q86YR6	POTED										#DIV/0!	#NUM!
Q5SRN5	POTED		195146				1.77669e+06			249588	-3.18656	#NUM!
Q9NRG9	AAAS	299153									#DIV/0!	#NUM!
Q6P2H3	CEP85										#DIV/0!	#NUM!
Q9C0F1	CEP44										#DIV/0!	#NUM!
Q1ED39	KNOP1				537026	540428					#DIV/0!	#NUM!
Q9UK59	DBR1	1.00423e+06	363529	471772	192936				79218.5	161300	1.66818	0.398141
A0A087X211	CIP2A		60381.4								#DIV/0!	#NUM!
A0A0A0MRI2	SNX6	533054	329822								#DIV/0!	#NUM!
Q70UQ0	IKBIP	46155	20299.7			8364.09		19148.1	29364.3	24276.4	1.99009	0.330936
A0A075B740	TMEM249			867886					2.45989e+06	3.85197e+06	#DIV/0!	#NUM!
Q9BYK8	HELZ2										#DIV/0!	#NUM!
Q92692	NECTIN2										#DIV/0!	#NUM!
Q64LD2	WDR25	961505	450018		1.34893e+06	1542496	981553	972989	1.32891e+06	1.50937e+06	-0.871229	0.87724
A0A590UK67	PLA2G6										#DIV/0!	#NUM!
Q8IV38	ANKMY2	230946	334164		799154	1.72177e+06	259705	446273	1.65072e+06	833342	-1.71385	0.484444
P82912	MRPS11										#DIV/0!	#NUM!
Q02386	ZNF45	137224	108590	70125.1	66414.8	135985	100077	93919.2	92384.1		0.0628235	0.0554009
P09486	SPARC				214113	280491					#DIV/0!	#NUM!
